# 1 Microcephaly-associated WDR62 mutations hamper Golgi apparatus-to- 2 spindle pole shuttling in human neural progenitors

3

4 Claudia Dell'Amico<sup>1</sup>, Marilyn M. Angulo Salavarría<sup>1</sup>, Yutaka Takeo<sup>2</sup>, Ichiko Saotome<sup>2</sup>, Maria Teresa  
5 Dell'Anno<sup>3</sup>, Maura Galimberti<sup>4,5</sup>, Enrica Pellegrino<sup>1,6</sup>, Elena Cattaneo<sup>4,5</sup>, Angeliki Louvi<sup>2,\*</sup>, Marco  
6 Onorati<sup>1,\*</sup>

7

8 <sup>1</sup>Department of Biology, Unit of Cell and Developmental Biology, University of Pisa, Pisa, Italy;  
9 claudia.dellamico@phd.unipi.it (C.D.); marilyn.angulo@phd.unipi.it (M.M.A.S.)

10 <sup>2</sup>Departments of Neurosurgery and Neuroscience, Yale School of Medicine, New Haven, USA;  
11 yutaka.takeo@yale.edu (Y.T.); isaotome@health.ucsd.edu (I.S.)

12 <sup>3</sup>Fondazione Pisana per la Scienza, San Giuliano Terme, Italy; mt.dellanno@fpscience.it (M.T.D.A)

13 <sup>4</sup>Dipartimento di Bioscienze, Università degli Studi di Milano, Milan, Italy; maura.galimberti@unimi.it (M.G.);  
14 elena.cattaneo@unimi.it (E.C.)

15 <sup>5</sup>INGM, Istituto Nazionale Genetica Molecolare, Milan, Italy

16 <sup>6</sup>Host-Pathogen Interactions in Tuberculosis Laboratory, The Francis Crick Institute, London, UK;  
17 enrica.pellegrino@crick.ac.uk (E.P.)

18

19 \*Correspondence: (M.O.) marco.onorati@unipi.it, Tel. +39-050221489; (A.L.) angeliki.louvi@yale.edu, Tel.  
20 +1-2037372457

21

22

## 23 **Abstract**

24

25 WDR62 is a spindle pole-associated scaffold protein with pleiotropic functions during corticogenesis.  
26 Recessive mutations in WDR62 are associated with structural brain abnormalities and account for  
27 the second most common cause of autosomal recessive primary microcephaly (MCPH), indicating  
28 WDR62 as a critical hub for human brain development. Here, we investigated a C-terminal truncating  
29 mutation (D955AfsX112) in WDR62 using induced pluripotent stem cells (iPSCs) obtained from a  
30 patient with MCPH2. We generated neuroepithelial stem (NES) cells and cerebro-cortical  
31 progenitors and neurons from patient-derived and isogenic retro-mutated iPSC lines. We found that  
32 WDR62 dysfunction resulted in impaired cell cycle progression and alterations of the neurogenic  
33 trajectories of iPSC neuroderivatives. Moreover, we report WDR62 localization at the Golgi  
34 apparatus during interphase, both in human neural progenitors in vitro and in human fetal brain  
35 tissue. WDR62 shuttling from the Golgi apparatus to spindle poles is dynamic and microtubule-  
36 dependent. Impairment of WDR62 function and localization results in severe neurodevelopmental  
37 abnormalities, thus delineating new mechanisms in MCPH etiology.

38

39 **Introduction:**

40

41 The development of the human brain is a sophisticated process that extends over several decades,  
42 during which a plethora of distinct cell types are generated and assembled into functionally distinct  
43 circuits and regions (Lui et al., 2011; Silbereis et al., 2016). The precise orchestration and  
44 coordination of neural stem/progenitor cell proliferation and differentiation are pivotal for the  
45 formation and function of the central nervous system (CNS). Deviations from normal  
46 neurodevelopmental processes, e.g., cell cycle progression, symmetric versus asymmetric cell  
47 divisions, lineage commitment, as well as neuronal migration and differentiation, ultimately affect the  
48 structure and function of the CNS and can lead to neurological or psychiatric disorders (M. Li et al.,  
49 2018).

50 Mutations in genes involved in the regulation of mitotic progression in neural progenitor cells (NPCs)  
51 have been identified in several types of MCPH (Phan & Holland, 2021; Thornton & Woods, 2009), a  
52 genetically heterogeneous disorder characterized by occipito-frontal circumference 3-4 standard  
53 deviations below the mean of ethnically-, age-, and sex-matched controls (Woods & Parker, 2013).  
54 Intriguingly, many of the genes associated with MCPH encode centrosomal or pericentriolar proteins,  
55 while others participate in mitotic spindle organization and mitotic progression (Jayaraman et al.,  
56 2018; Phan & Holland, 2021).

57 Recessive mutations in WDR62, located on chromosome 19, are responsible for the second most  
58 frequent form of MCPH (Bilgüvar et al., 2010; Nicholas et al., 2010; Yu et al., 2010). WDR62 encodes  
59 a WD-domain containing protein, member of an ancient large family of proteins involved in  
60 coordinating multiprotein assemblies, with the WD repeats serving as a scaffold for protein  
61 interactions (Shohayeb et al., 2018). WD-repeat proteins have pleiotropic functions, ranging from  
62 signal transduction and transcriptional regulation to cell cycle control and apoptosis (Jain & Pandey,  
63 2018; D. Li & Roberts, 2001; Smith et al., 1999; Stirnimann et al., 2010). WDR62 is a spindle pole-  
64 associated protein involved in mitotic progression and NPC maintenance (Sgourdou et al., 2017). In  
65 addition, it has a pivotal role in the assembly and disassembly of the primary cilium (Shohayeb et  
66 al., 2020; Zhang et al., 2019), an antenna-like structure able to sense and convey extracellular cues  
67 guiding NPC proliferation versus differentiation (Wilsch-Bräuninger & Huttner, 2021). The subcellular  
68 localization of WDR62 is cell-cycle dependent and regulated by its N and/or C-terminal domains and  
69 microtubule association (Bogoyevitch et al., 2012). Notably, in interphase, WDR62 is enriched in the  
70 centrosome via stepwise hierarchical interactions with other MCPH-associated proteins, including  
71 CDK5RAP2 at the top and CEP63 at the bottom of the cascade (Kodani et al., 2015; O'Neill et al.,  
72 2022). This complex is then stabilized by centriolar satellite proteins and is required for proper  
73 centriole duplication (Kodani et al., 2015).

74 We previously reported a homozygous truncating mutation (D955AfsX112) in WDR62 in patients  
75 with microcephaly and structural brain abnormalities (Sgourdou et al., 2017). In the present work,  
76 we directly investigated the effects of this mutation on NPC proliferation and neurogenic potential,  
77 taking advantage of patient-derived induced pluripotent stem cells (iPSCs) and isogenic lines  
78 generated via CRISPR/Cas9 gene editing (Dell' Amico et al., 2021). From WDR62 and Isogenic  
79 iPSCs we derived neuroepithelial stem (NES) cells, the founders of cerebro-cortical cellular  
80 complexity (Baggiani et al., 2020; Onorati et al., 2016), as well as terminally differentiated cerebro-  
81 cortical neurons, through a directed differentiation protocol (Chambers et al., 2009; Shi et al., 2012).

82 Our results suggest that the mutation under study impairs cell cycle progression, leading to lineage  
83 specification defects in iPSC-derived cerebrocortical neurons. We also found that WDR62  
84 dynamically associates with the Golgi apparatus, both in NES cells and human fetal telencephalic  
85 tissue. During the interphase-to-mitosis transition, WDR62 shuttles from the Golgi apparatus to the  
86 spindle poles in a microtubule-dependent manner. Nocodazole treatment of Isogenic control NES  
87 cells mimics the effects of the genetic mutation, preventing WDR62 shuttling from the Golgi  
88 apparatus to the spindle poles during cell cycle progression. These findings, together with  
89 perturbations we observed in the timing of differentiation of cerebro-cortical neurons from mutant  
90 iPSCs, suggest novel potential mechanisms underlying WDR62 involvement in human  
91 neurodevelopment and MCPH etiology.

92

## 93 **Results**

### 94 The D955AfsX112 mutation produces a truncated WDR62 protein and disrupts spindle pole 95 localization

96 We previously reported a consanguineous family with two affected siblings displaying global  
97 developmental delay (Sgourdou et al., 2017). The index case, a 13-year-old male, and his 6-year-  
98 old brother, presented to medical attention for global developmental delay, severe microcephaly,  
99 and dysmorphic facial traits. Neuroimaging revealed a plethora of developmental abnormalities  
100 including diffuse pachygyria, thickened cortex, hypoplastic corpus callosum, and metopic synostosis.  
101 Whole exome sequencing identified a homozygous 4bp deletion in exon 23 of WDR62, leading to a  
102 frameshift and a premature STOP codon (a.a. 1067), which resulted in a C-terminally truncated  
103 peptide (D955AfsX112) (Figure 1A). The mutation was confirmed to be homozygous in both affected  
104 subjects, and heterozygous in both parents by Sanger sequencing (Sgourdou et al., 2017). To  
105 investigate possible alterations of cortical development linked to the mutation, fibroblasts (obtained  
106 from skin biopsies from family members) were reprogrammed to iPSCs ("WDR62 iPSCs") using  
107 episomal vectors, assessed for pluripotency, and subsequently differentiated to relevant neural  
108 populations, i.e., NES cells and mature cerebro-cortical neurons (Figure 1B and Figure 1-figure

109 supplement 1) (Chambers et al., 2009). To obtain a gold-standard control for all subsequent  
110 analyses, we corrected the mutation through CRISPR/Cas9 gene editing technology in the WDR62  
111 iPSC line, generating isogenic controls (hereafter “Iso iPSCs”). We verified sequence restoration in  
112 5 clones by Sanger sequencing (Figure 1B); three randomly selected clones were verified for  
113 pluripotency (Figure 1-figure supplement 1) and further analyzed. We examined WDR62 expression  
114 in WDR62 iPSCs by confocal imaging and found that the mutation impairs spindle pole localization  
115 during mitosis, with mutant WDR62 appearing diffuse around the nucleus (Figure 1C). In contrast,  
116 in external control (CTRL) iPSCs, WDR62 was detected at the spindle poles, identified by PCNT and  
117 TUBA1A co-staining, (Figure 1C and Figure 1-figure supplement 2 A-C), as we reported previously  
118 (Sgourdou et al., 2017). The WDR62 signal was restored at the spindle poles in mitotic Iso iPSCs  
119 (Figure 1C). Quantification of WDR62 signal distribution through fluorescence intensity analysis  
120 revealed high and narrow fluorescence peaks in Iso iPSCs, similarly to CTRL iPSCs (Figure 1D); in  
121 contrast, no such peaks were detected in patient-derived iPSCs (Figure 1C, D).



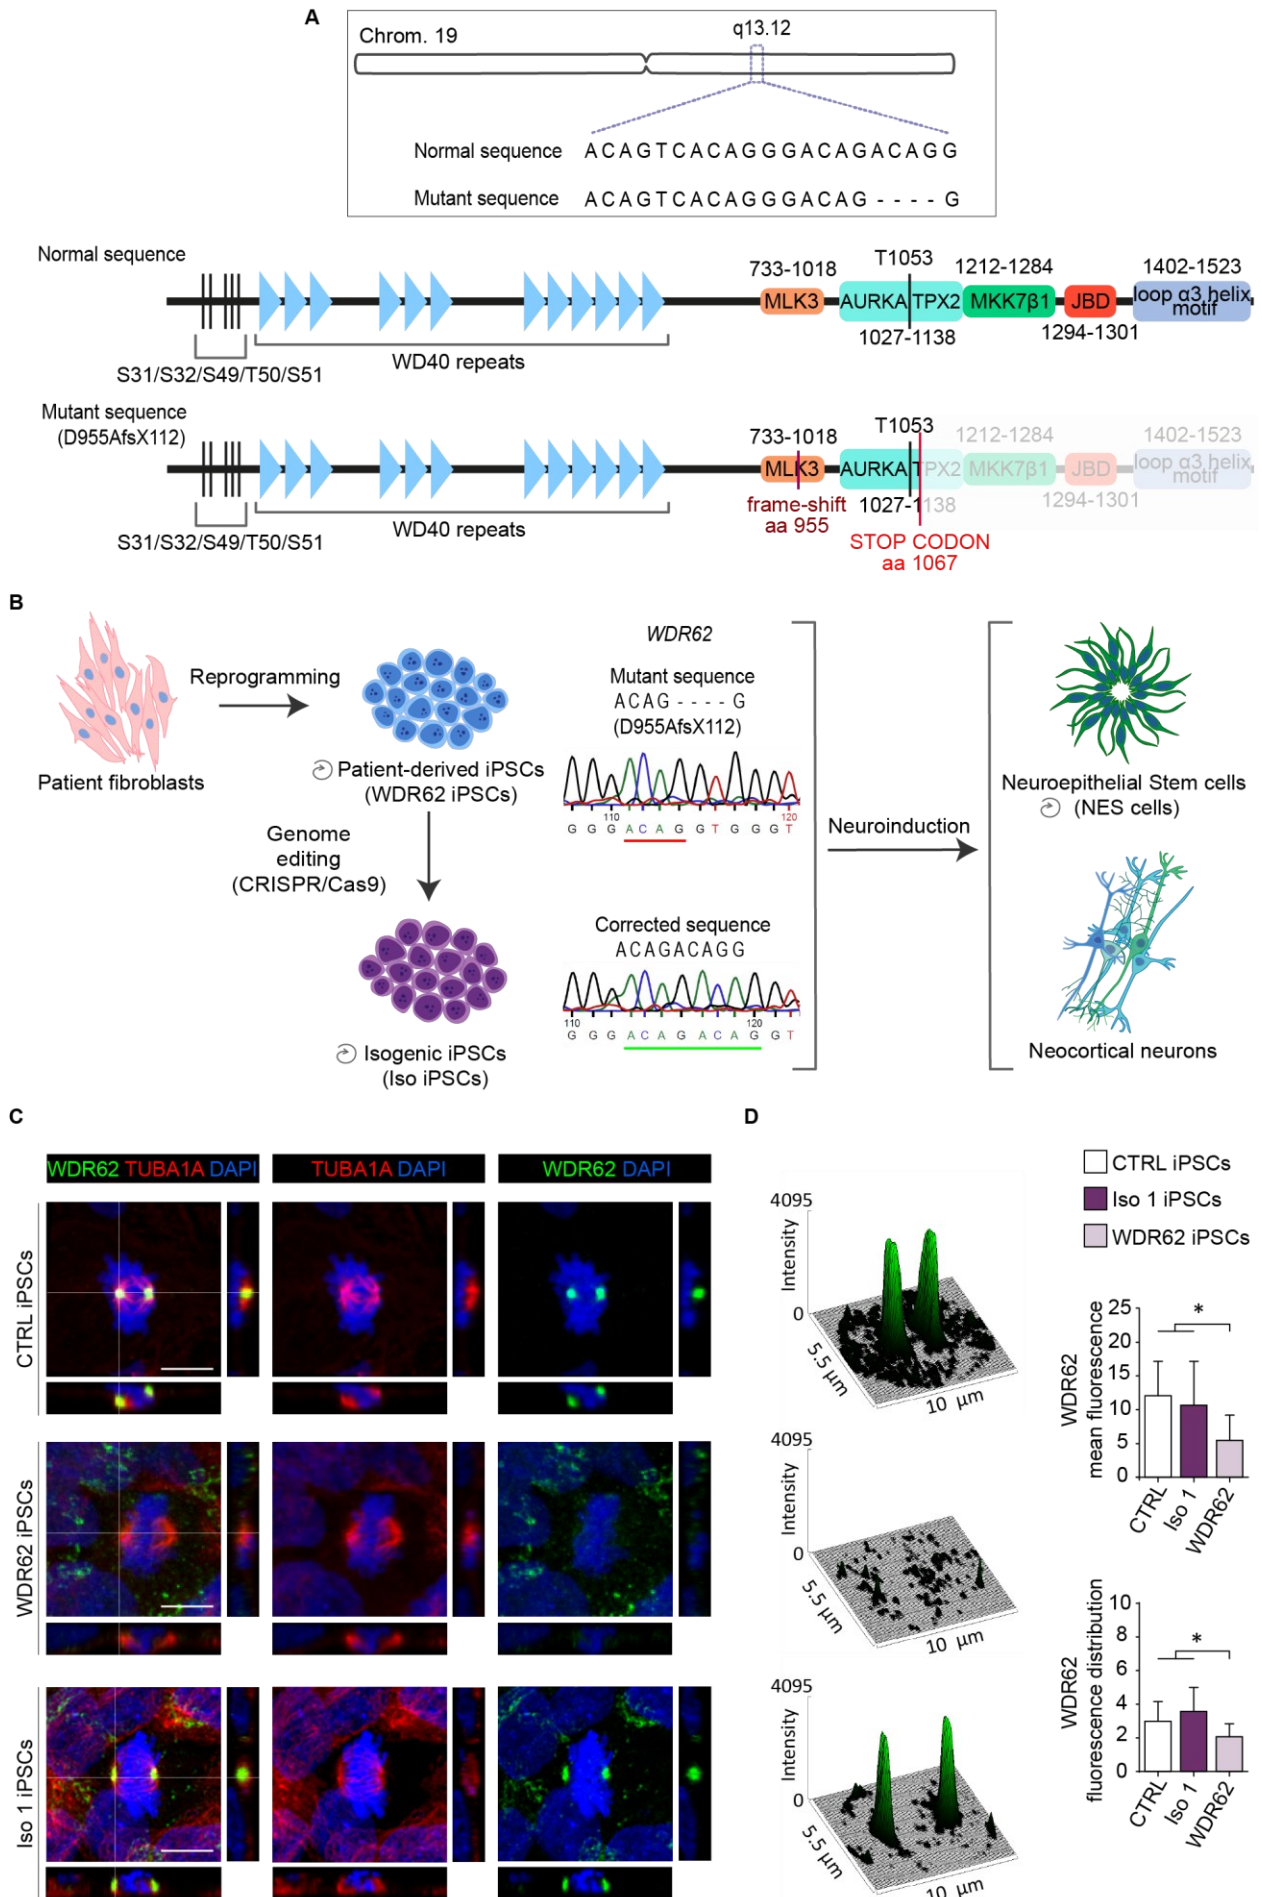

123 **Figure 1:** The D955AfsX112 mutation disrupts WDR62 spindle pole localization during mitosis. A) Schematic  
124 illustration of WDR62 gene structure on chromosome 19q13. The mutation is characterized by 4 bp (ACAG)  
125 deletion in exon 23 leading to a frameshift (D955AfsX112) and a C-terminally truncated protein. B) Scheme of  
126 experimental design. WDR62 iPSCs harboring the homozygous mutation and isogenic-corrected (Iso) iPSC  
127 lines were employed. Sanger sequencing of iPSCs shows the above-described mutation (top) and the  
128 CRISPR/Cas9 corrected sequence (bottom). A cerebro-cortical differentiation protocol was applied to WDR62  
129 and Iso 1 and/or Iso 2 iPSCs to obtain relevant neural populations. C) Representative confocal images of  
130 WDR62 and alpha-tubulin (TUBA1A) expression in CTRL (external control), WDR62 (mutant) and Iso 1 iPSCs  
131 during mitosis. D) Surface plots and fluorescence intensity analysis show WDR62 signal distribution  
132 (fluorescence distribution and mean fluorescence, arbitrary unit – a.u.) during metaphase. The CTRL and Iso  
133 1 iPSC lines show similar WDR62 signal distribution, which is decreased in the measured area in WDR62  
134 iPSCs (N = 47, p-value < 0.05, Kruskal-Wallis test, post hoc Dunn's test). Data are shown as mean ± SD.  
135 Scale bar = 10 µm.

136

### 137 The D955AfsX112 WDR62 mutation impacts cell cycle progression in NES cells

138 To investigate the cellular and molecular consequences of the mutation in the context of  
139 neurodevelopment, we differentiated WDR62- and Iso iPSCs toward neural fate by applying a  
140 neocortical NES cell derivation protocol (Chambers et al., 2009) (Figure 2A). Briefly, after initial  
141 induction of dorsal forebrain neuroepithelial identity, based on Dual SMAD inhibitors and the WNT  
142 inhibitor XAV, we captured long-term self-renewing populations of iPS-derived NES (iPS-NES) cells  
143 by adding growth factors.

144 By consensus, MCPH is thought to be a consequence of neural progenitor depletion/premature  
145 differentiation (Jayaraman et al., 2018; Phan & Holland, 2021). For instance, in MCPH3 (caused by  
146 mutations in CDK5RAP2) (Lancaster et al., 2013), MCPH5 (ASPM) (R. Li et al., 2017), and MCPH6  
147 (CENPJ) (Bond et al., 2005), neural progenitors at the Ventricular Zone (VZ)/Sub-Ventricular Zone  
148 (SVZ) lose their broad proliferative capacity impacting final brain architecture and size (Gabriel et  
149 al., 2020; Phan & Holland, 2021). For this reason, we sought to determine whether the WDR62  
150 mutation might impact NES cell features. We first assessed WDR62 mRNA and protein production  
151 in WDR62 iPS-NES cells. We found no differences in the expression level of WDR62 by RT-qPCR  
152 between Iso and WDR62 iPS-NES cells (Figure 2-figure supplement 1A). We also detected by  
153 Western blot the WDR62 mutant protein (Figure 2-figure supplement 1B and Figure 2-figure  
154 supplement 1-source data 1).

155 We performed phenotypic analysis on normal versus WDR62 mutant NES cells. By staining with  
156 MKI67 (also known as Ki-67) and PH3, markers of proliferating cells, we found significantly fewer  
157 MKI67<sup>+</sup> cells in WDR62 iPS-NES cultures (Figure 2B). Since MKI67 detects cells at all phases of the  
158 cell cycle except G<sub>0</sub>, this result suggests that WDR62 iPS-NES cells show a tendency for premature

159 cell cycle exit. On the other hand, we did not find significant differences in the global mitotic index  
160 (PH3<sup>+</sup>/total cells) or mitotic figure distribution (i.e., cells at each mitotic phase, evaluated through  
161 PH3 staining), between WDR62, Iso 1 and Iso 2 iPS-NES cells in unsynchronized cultures (Figure  
162 2B).

163 Aware that growth factor supplementation can propel NES cell proliferation, we further investigated  
164 cell cycle progression using additional methods. We induced cell cycle arrest through nocodazole -  
165 a microtubule depolymerizing agent (Figure 2C) - to synchronize iPS-NES cell cultures and evaluate  
166 their capability to reorganize cytoskeletal components, such as the mitotic spindle, and proceed  
167 through mitosis. As previously reported (Matsui et al., 2012; Yiangou et al., 2019), nocodazole  
168 treatment induces prometaphase arrest synchronizing the cultures after 16 h (T1). Following  
169 nocodazole removal and 1 h release (T2), cells re-enter the cell cycle. Our analysis revealed that,  
170 compared to Iso 1 and Iso 2 iPS-NES cells, the percentage of WDR62 iPS-NES cells in  
171 prometaphase was reduced at T1, but increased at T2 (Figure 2C). Iso iPS-NES cells responded to  
172 the treatment as expected, with more than 80% of cells arrested in prometaphase at T1 re-entering  
173 the cell cycle at T2. Therefore, our data confirm that WDR62 iPS-NES cells, after an insult affecting  
174 cell cycle progression, are delayed compared to Iso counterparts.

175 Given previously described functions of WDR62 in regulating mitotic spindle stability and mitotic  
176 spindle angle (Bogoyevitch et al., 2012; Guerreiro et al., 2021; Miyamoto et al., 2017), and primary  
177 cilium assembly/disassembly (Shohayeb et al., 2020; Zhang et al., 2019), we evaluated inter-  
178 centrosomal distance (ICD) and spindle pole angle, two indicators of mitotic spindle formation and  
179 integrity. ICD, measured as edge-to-edge pericentrin (PCTN) signal, which localizes in close  
180 proximity to the centrosome, was not altered in WDR62 iPS-NES cells (Figure 2D). On the contrary,  
181 the spindle angle was smaller in WDR62 iPS-NES cells compared to Iso 1 and Iso 2 iPS-NES cells  
182 ( $p < 0.05$ ) (Figure 2E), thus suggesting mitotic spindle abnormalities.

183 WDR62, together with CEP170 and KIF2A, has been proposed to promote primary cilia assembly  
184 (Zhang et al., 2019). This prompted us to test primary cilia length in WDR62 iPS-NES cells through  
185 staining with PCTN, which is localized at the basal body during interphase (Bettencourt-Dias et al.,  
186 2011) and ARL13B, a marker of primary cilia (Figure 2F). Primary cilia appeared significantly  
187 shortened in WDR62 iPS-NES cells, compared to Iso counterparts (Figure 2F). Taken together,  
188 these results suggest a general disruption of mitotic progression in WDR62 iPS-NES cells, most  
189 likely due to spindle defects and primary cilium impairment.

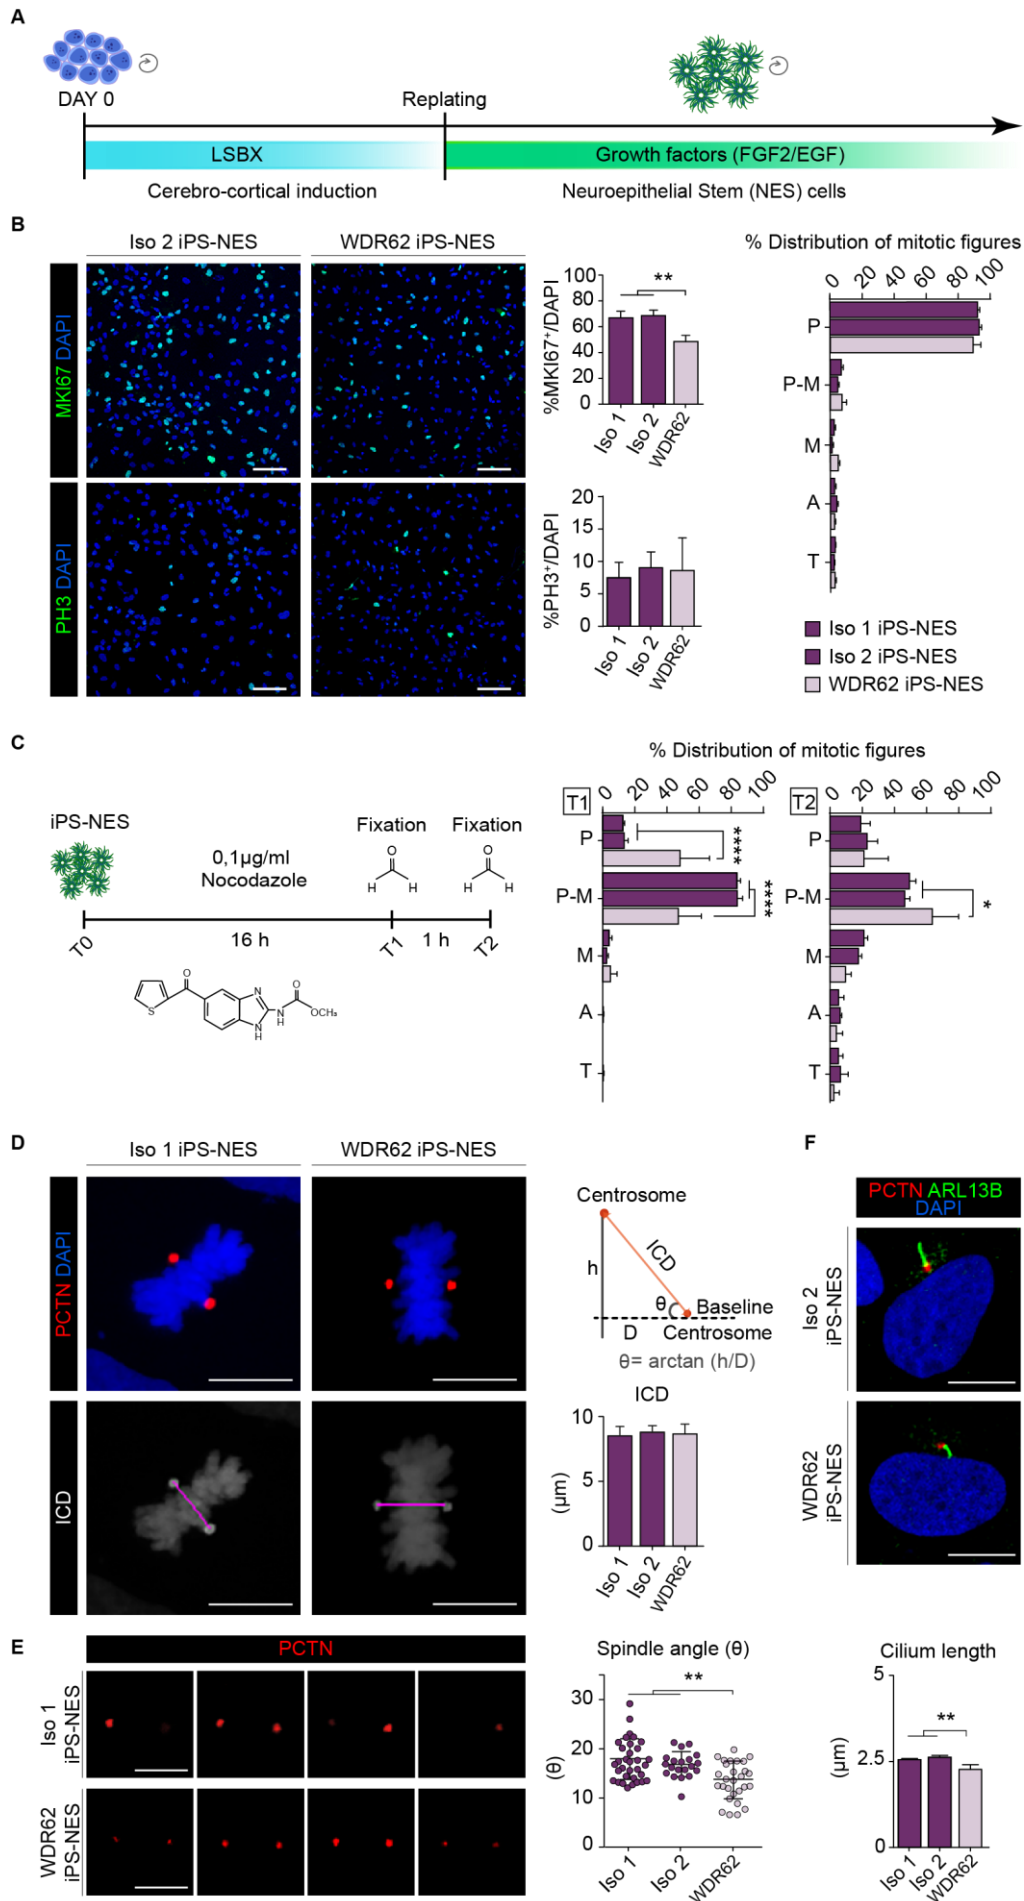

191 **Figure 2:** WDR62 iPS-NES cells exhibit defects in cell cycle regulation. A) Schematic illustration of NES cell  
192 derivation protocol. B) Representative confocal images of MKI67 and PH3 in Iso and WDR62 iPS-NES cell  
193 lines. Quantitative analysis for MKI67 and PH3 reveals a decrease in G<sub>1</sub>-M (MKI67<sup>+</sup>, N = 3315), but not in  
194 mitotically active cells (PH3<sup>+</sup>, N = 12684), p-value < 0.001 and p-value > 0.05, respectively. One-way ANOVA,  
195 post-hoc Tukey's test. Mitotic figure distribution in unsynchronized cell cultures (global mitotic index) does not  
196 show significant differences between WDR62 and Iso iPS-NES cell lines (N = 12684, p-value < 0.05, two-way  
197 ANOVA, post hoc Dunnett's test). P (prophase); P-M (prometaphase); M (metaphase); A (anaphase) and T  
198 (telophase). C) Scheme of synchronization experiment in iPS-NES cells. Immunofluorescence and quantitative  
199 analysis after 16 h of treatment (T1) show increased mitotic cell fraction in P-M. The percentage of  
200 synchronized P-M cells is higher in Iso iPS-NES than in WDR62 iPS-NES cultures. Fewer WDR62 iPS-NES  
201 cells proceed to M following nocodazole treatment and subsequent release in standard culture conditions (T2)  
202 compared to Iso iPS-NES cells (N = 8764, p-value < 0.0001, two-way ANOVA, post hoc Dunnett's test and N  
203 = 9751, p-value < 0.05, two-way ANOVA, post hoc Dunnett's test). D) Representative confocal images of  
204 PCTN and DAPI staining in Iso iPS-NES and WDR62 iPS-NES cells in M and example of inter-centrosome  
205 distance measurements (ICD) and spindle angle ( $\theta$ ). Quantitative analyses show no differences in ICD (N =  
206 81, p-value > 0.05, one-way ANOVA, post hoc Sidak's test). E) Confocal images of deconstructed Z-stacks of  
207 PCTN signal in iPS-NES cell lines in M. Spindle angle ( $\theta$ ) is smaller in WDR62 iPS-NES compared with Iso  
208 iPS-NES cells (N = 81, p-value < 0.01, one-way ANOVA, post hoc Dunnett's test). F) Immunofluorescence  
209 analysis of PCTN and ARL13B in iPS-NES cells during interphase. Quantitative analysis shows shorter primary  
210 cilia in WDR62 iPS-NES cells (N = 850, p-value < 0.01, one-way ANOVA, post hoc Dunnett's test). Data are  
211 shown as mean  $\pm$  SD. Scale bar = 100  $\mu$ m in B and 10  $\mu$ m in D, E, F.

212

### 213 The D955AfsX112 mutation disrupts WDR62 Golgi-to-spindle pole shuttling

214 In addition to its transient association with the spindle poles during mitosis in iPSCs, we detected  
215 WDR62 as a polarized perinuclear signal during interphase, which appeared to be localized around  
216 the centrosome (marked by PCTN) in G<sub>1</sub>-S in iPSCs (Figure 3-figure supplement 1). Because the  
217 Golgi apparatus is known to be in close physical proximity to the centrosome (Sütterlin & Colanzi,  
218 2010), we examined a potential association of WDR62 with the Golgi apparatus in Iso and WDR62  
219 iPS-NES cells by immunofluorescence.

220 In Iso iPS-NES cells during mitosis, the WDR62 signal was centered, as expected, on discrete  
221 regions corresponding to the spindle poles (TUBA1A-positive) (Figure 3A). On the other hand, the  
222 Golgi signal (GOLGA1/Golgin 97-positive) was diffuse and scattered around the chromatin,  
223 representing the clusters forming during mitosis that are eventually partitioned between daughter  
224 cells (Ayala et al., 2020). In contrast, in WDR62 iPS-NES during mitosis, the WDR62 signal was  
225 diffuse and overlapped with GOLGA1 in more than 60% of cells analyzed (Figure 3B and Figure 3-  
226 figure supplement 2A). Despite its divergent behavior in mitotic WDR62 and Iso iPS-NES cells,  
227 WDR62 localized to the Golgi apparatus during interphase in iPS-NES cells of both genotypes



228 (Figure 3C and Figure 3-figure supplement 2B). Furthermore, analysis of fluorescence signal  
229 intensity suggested that full-length and mutant WDR62 localize to the Golgi apparatus at comparable  
230 amounts, potentially excluding a non-physiological accumulation of the mutant protein (Figure 3C).

231 We took several approaches to exclude that the WDR62 localization to the Golgi we observed could  
232 be due to lack of antibody specificity. First, we immunostained CTRL iPS-NES following siRNA-  
233 mediated knockdown of WDR62. No signal was detected in WDR62-silenced cells (Figure 3-figure  
234 supplement 3A-D). Next, we co-transfected CTRL iPS-NES cells with wild type or mutant hWDR62-  
235 FLAG and GALT1-mWasabi (which localizes to the Golgi (Cole et al., 1996)) (Figure 3-figure  
236 supplement 4A), and analyzed transfected cells with confocal imaging. We observed co-localization  
237 of FLAG (corresponding to wild type or mutant WDR62) and mWasabi signals, similar to what we  
238 observed for the endogenous WDR62 and Golgi signals (Figure 3-figure supplement 4B).

239 To strengthen these observations, we investigated WDR62 localization in sections of human fetal  
240 telencephalon from a presumed healthy subject at 9 post-conceptual weeks (pcw), when WDR62  
241 is broadly expressed in neural progenitor populations (Bilgüvar et al., 2010; Nicholas et al., 2010).  
242 Strikingly, in the cortical plate, where committed neuroblasts are populating the incipient cortical  
243 layers, the WDR62 signal was polarized and perinuclear, overlapping with the Golgi marker GOLGA2  
244 (also known as GM130), thus retracing the pattern observed in iPS-NES cells (Figure 3E', 3E''). In  
245 the cortical VZ, where radial glial progenitors reside and most mitotic events occur, WDR62 was  
246 visible at TUBA1A-positive spindle poles in mitotic cells (Figure 3E', 3E'''); in contrast, the WDR62  
247 signal appeared elongated and scattered in interphase cells, reminiscent of the distribution of the  
248 Golgi apparatus along radial processes (Taverna et al., 2016) (Figure 3-figure supplement 5A-C).  
249 Finally, in human fetal incipient dorsal and ventral telencephalic areas at 11 pcw, WDR62 and  
250 GOLGA2 signals were polarized and perinuclear in the cortical plate and the mantle zone of the  
251 developing striatum, but scattered along NPC processes at the germinative zones (Castiglioni et al.,  
252 2019; Onorati et al., 2014) (Figure 3-figure supplement 5D-E).

253 Thus, these data suggest a dynamic association between WDR62 and the Golgi apparatus in human  
254 NPCs in vitro, and in the developing human telencephalon.

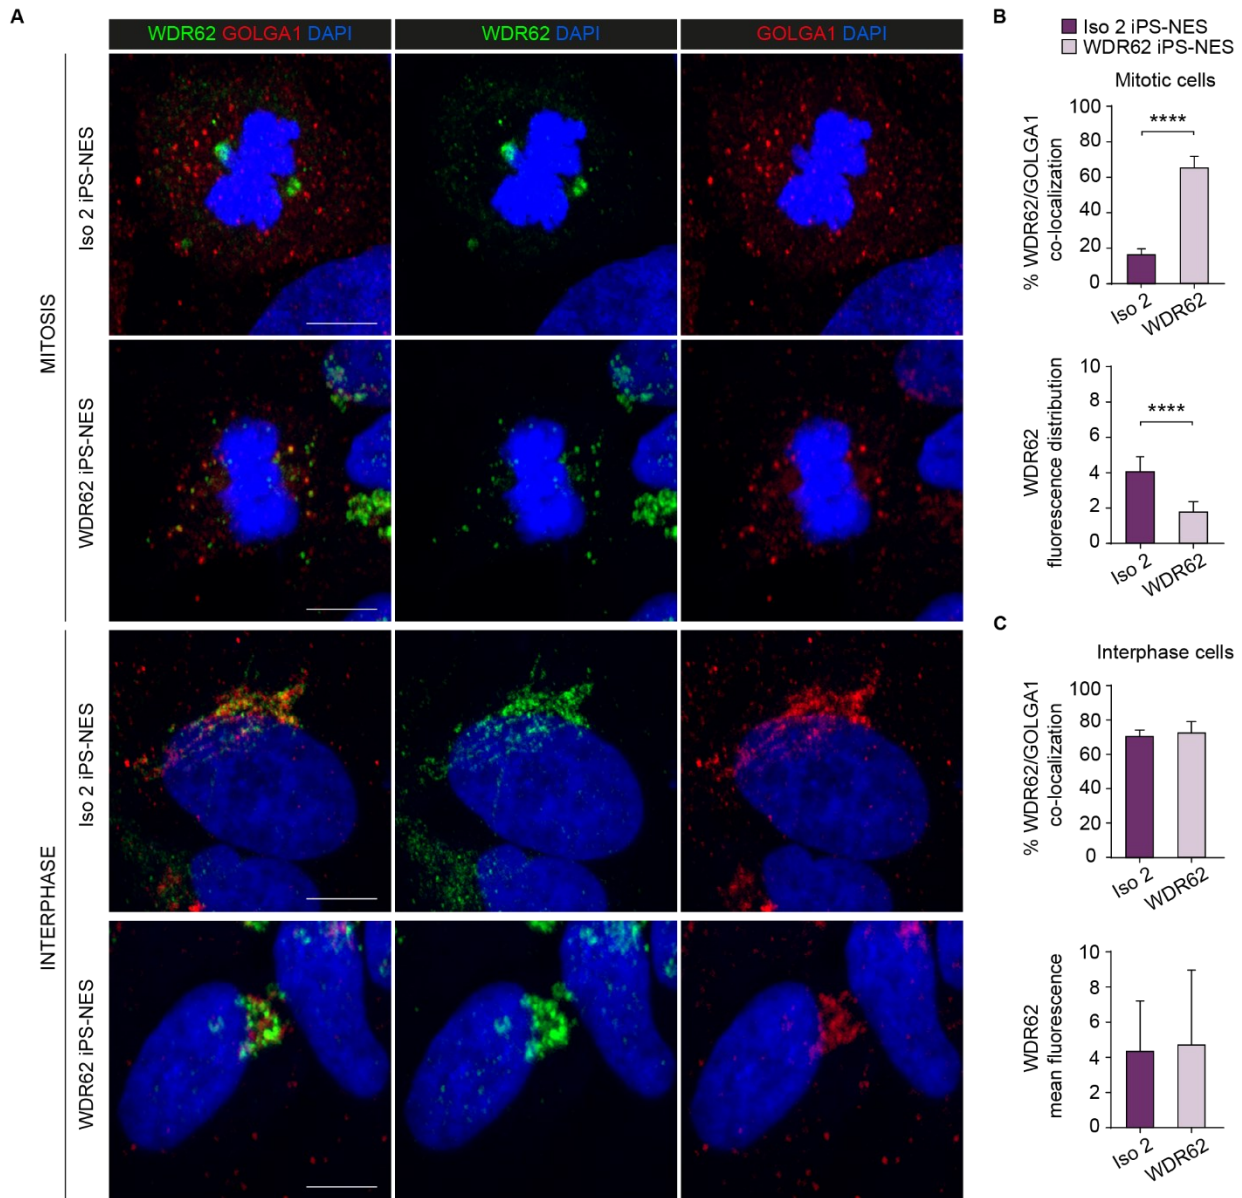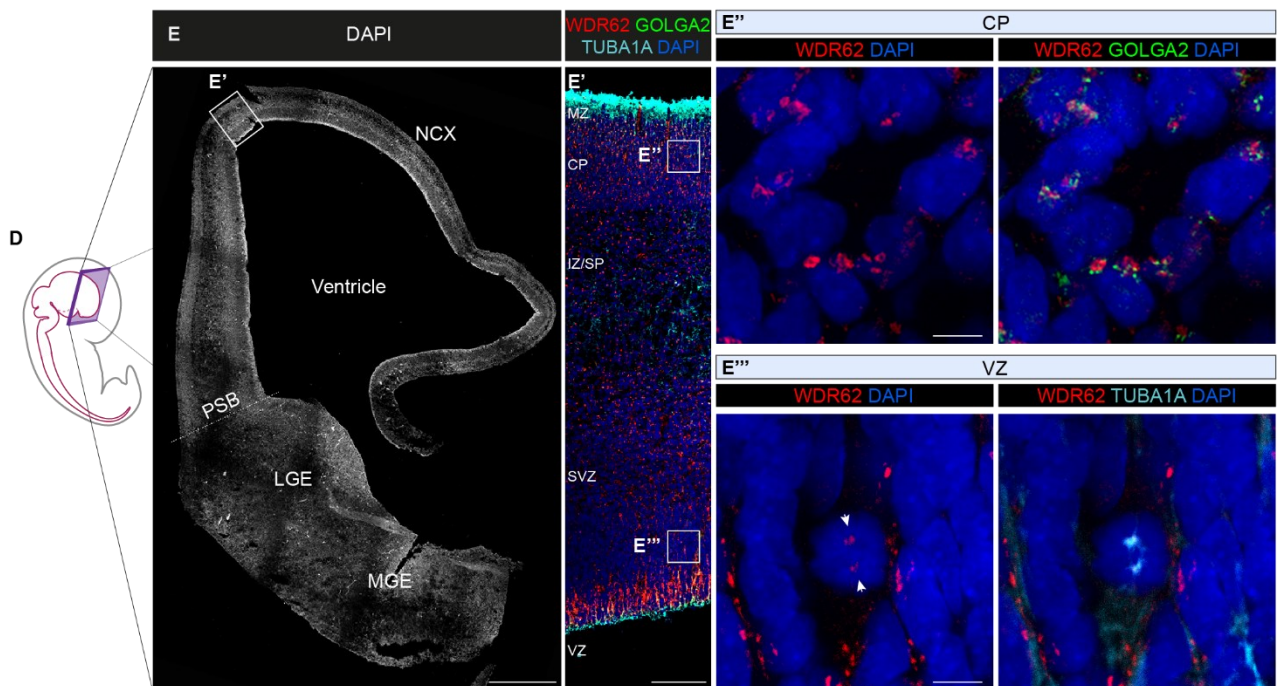



256 **Figure 3:** WDR62 displays cell cycle-dependent localization in Golgi/centrosome/spindle poles in iPS-NES  
257 cells and human fetal telencephalon. A) Immunofluorescence analysis of WDR62, GOLGA1, and TUBA1A in  
258 iPS-NES cells during mitosis (metaphase) and interphase. B-C) Analysis of WDR62 localization during cell  
259 cycle progression. In Iso 2 iPS-NES cells, WDR62 is localized to the spindle poles during mitosis, and co-  
260 localized with GOLGA1 in interphase. In WDR62 iPS-NES cells, the WDR62 signal remains diffuse and co-  
261 localizes with GOLGA1 during mitosis. The WDR62 subcellular localization is comparable in Iso 2 and WDR62  
262 iPS-NES cells during interphase. In B) total cells N = 33, p-value < 0.0001, Kolmogorov-Smirnov test, top  
263 histogram; total cells N = 21, p-value < 0.0001, unpaired Student's t-test, bottom histogram; fluorescence  
264 distribution, a.u.; in (c), total cells N = 60, p-value > 0.05, unpaired Student's t-test, top histogram; total cells N  
265 = 164, p-value > 0.05, unpaired Student's t-test, bottom histogram. D) Schematic illustration of a human fetal  
266 specimen showing the developing nervous system. E) DAPI staining of a coronal hemisection of human  
267 telencephalon at 9 post-conceptual weeks (pcw). E') Magnification of the boxed area in E) showing  
268 WDR62/GOLGA2/TUBA1A expression in the developing NCX. E'', E''') Magnified views of the boxed areas in  
269 E' showing WDR62/GOLGA2 expression in CP (E'') and WDR62/TUBA1A expression in VZ (E'''). Data are  
270 shown as mean  $\pm$  SD. Scale bar = 10  $\mu$ m in A, 500  $\mu$ m in E, 100  $\mu$ m in E' and 5  $\mu$ m in E'''. NCX (Neocortex);  
271 PSB (Pallium-Subpallium Boundary); LGE (Lateral Ganglionic Eminence); MGE (Medial Ganglionic  
272 Eminence); MZ (Marginal Zone); CP (Cortical Plate); IZ/SP (Intermediate Zone/Subplate); SVZ (Sub-  
273 Ventricular Zone); VZ (Ventricular Zone).

274

### 275 WDR62 shuttling to spindle poles depends on microtubules

276 Next, we sought to investigate the mechanism underlying WDR62 shuttling from the Golgi apparatus  
277 to the spindle poles at the interphase/mitosis transition. As previously reported (Wang et al., 2010;  
278 Welburn & Cheeseman, 2012), several MCPH-related proteins translocate from various cellular  
279 compartments to the spindle poles or centrosomes along microtubular rails. Among them,  
280 CDK5RAP2, CEP63, together with WDR62 and ASPM, are known to belong to the same molecular  
281 assembly localizing hierarchically at the centrosome during interphase (Kodani et al., 2015).

282 First, we examined the consequences of microtubule depolymerization on WDR62 localization  
283 dynamics. Following nocodazole treatment and fixation, WDR62 appeared diffuse around the  
284 nucleus in mitotic Iso iPS-NES cells and was absent from the spindle poles or  
285 centrosome/pericentrosomal area, stained with CETN2 (Degl'Innocenti et al., 2022) or PCTN (Figure  
286 4A); the same pattern was also observed in WDR62 iPS-NES cells (Figure 3B). We analyzed  
287 WDR62 signal intensity and distribution around chromatin and mean fluorescence values (Figure  
288 4B) before and after nocodazole treatment, confirming that the observed pattern was comparable to  
289 mutant WDR62 distribution in untreated WDR62 iPS-NES cells (Figure 3B). Moreover, the co-  
290 localization percentage of WDR62 to the Golgi apparatus was similar in treated Iso and WDR62 iPS-  
291 NES cells (Figures 3B and 4B). Together, these observations strongly suggest that microtubules are

292 fundamental for Golgi-to-spindle pole translocation of WDR62 during mitosis, and that the C-terminal  
293 part of the protein may have an important role in its interaction with microtubules.

294 Then, we asked whether the centrosomal localization of CDK5RAP2 was preserved in WDR62 NES  
295 cells. We found that, both during mitosis and interphase, CDK5RAP2 was correctly localized, as we  
296 reported previously for skin fibroblasts (Sgourdou et al., 2017) (Figure 4-figure supplement 1A).  
297 Then, we investigated CDK5RAP2 localization in Iso iPS-NES cells after nocodazole treatment. We  
298 found that, already during G<sub>1</sub> and before centriole duplication, CDK5RAP2 was localized to the  
299 centrosome both in untreated and nocodazole-treated cells (Figure 4-figure supplement 1B),  
300 whereas WDR62 remained localized to the Golgi (Figure 3B). After centriole duplication at early S-  
301 phase (Holland et al., 2010), CDK5RAP2 was detected at the centrosomes despite nocodazole  
302 treatment (O'Neill et al., 2022), even before centrioles started to migrate to participate in spindle pole  
303 formation (Figure 4-figure supplement 1B). During prometaphase, in untreated Iso iPS-NES cells,  
304 both CDK5RAP2 and WDR62 co-localized to the centrosome and properly positioned spindle poles,  
305 respectively (Figure 4-figure supplement 1B). In nocodazole-treated cells, however, the two proteins  
306 showed divergent behavior: CDK5RAP2 remained at the centrosome (Figure 4-figure supplement  
307 1C), whereas WDR62 appeared dispersed (Figure 4-figure supplement 1D). WDR62 and  
308 CDK5RAP2 have been reported to physically interact (Kodani et al., 2015). We overexpressed  
309 CDK5RAP2 and wild type or mutant WDR62 in HEK293T cells and then performed co-  
310 immunoprecipitation (co-IP). We found that the mutation did not prevent WDR62 interaction with  
311 CDK5RAP2 (Figure 4-figure supplement 1E and Figure 4-figure supplement 1-source data 1). These  
312 findings support the hypothesis that the mutation does not impinge physical interaction with  
313 CDK5RAP2, but prevents WDR62 shuttling to the spindle poles. Moreover, we tested by co-IP, in  
314 the same overexpression system, the effect of the mutation on WDR62 binding with other known  
315 interactors AURKA and TPX2 (Lim et al., 2015, 2016) (Figure 4-figure supplement 1F, G and Figure  
316 4-figure supplement 1-source data 2 and 3). Our results indicate that both interactions are preserved  
317 in the presence of mutant WDR62.

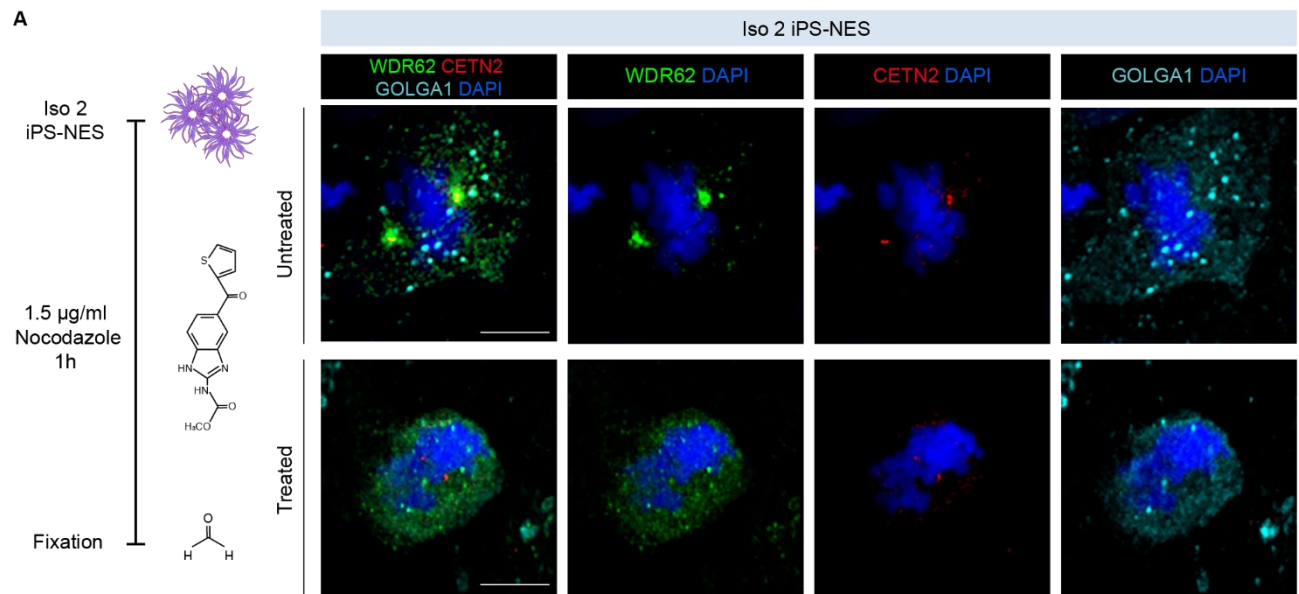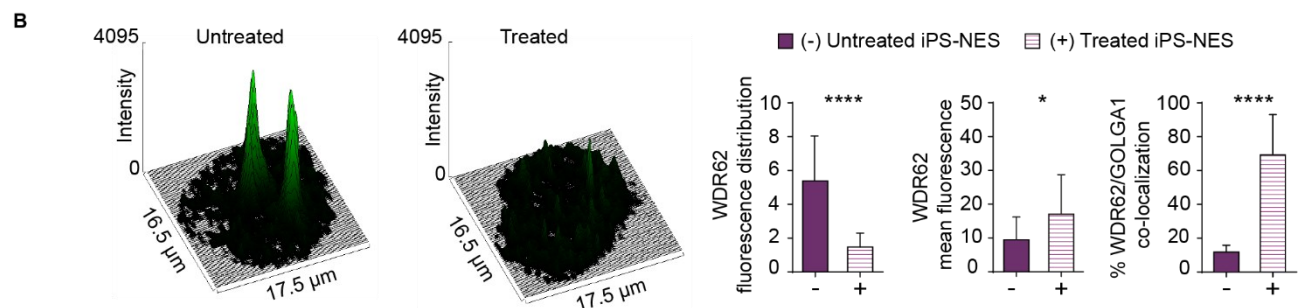

318

319 **Figure 4:** Microtubule-dependent shuttling of WDR62 to spindle poles. A) Immunofluorescence analysis of  
 320 WDR62, GOLGA1, and CETN2 in Iso 2 iPS-NES cells after microtubule depolymerization (1.5 µg/ml  
 321 nocodazole for 1 h). B) Analysis of WDR62 fluorescence reveals a similar signal distribution, mean  
 322 fluorescence, and co-localization with GOLGA1 in nocodazole-treated Iso and WDR62 iPS-NES cells (see  
 323 Figure 3A, B) during mitosis. Total cells N = 42, p-value < 0.0001, Kolmogorov-Smirnov test, left histogram;  
 324 total cells N = 42, p-value < 0.05, Kolmogorov-Smirnov test, center histogram; total cells N = 32, p-value <  
 325 0.0001, unpaired Student's t-test, right histogram. Data are shown as mean ± SD. Scale bar = 10 µm.

326

### 327 The D955AfsX112 mutation impairs neurogenic timing

328 Considering its impact on self-renewing NES cells, we next investigated potential effects of the  
 329 WDR62 mutation on iPSC differentiation into mature cortical neurons and glia. We employed a  
 330 directed cerebro-cortical differentiation protocol (Figure 5A): after the initial neuroinduction phase,  
 331 we obtained, at 16 days in vitro (DIV16), neuroectodermal cells, which were subsequently driven  
 332 toward terminal differentiation through addition of supplements and neurotrophins (i.e., BDNF)  
 333 (Chambers et al., 2009; Shi et al., 2012). Quantification of MKI67<sup>+</sup> and PH3<sup>+</sup> mitotic cells, as well as  
 334 EdU-incorporating S-phase cells, revealed an increase in mitotic index (PH3<sup>+</sup>) in progeny of WDR62  
 335 versus Iso iPSCs at DIV16 (Figure 5B), but no differences at DIV40 (Figure 5C). Neuronal

336 maturation, reflected by the percentage of MAP2<sup>+</sup> cells, was similar in WDR62 and Iso iPSC-DIV40  
337 (Figure 5C), suggesting that general neurogenic properties were not altered. Next, we investigated  
338 layer-specific fate of early-born neurons in DIV40 cultures and observed a significant enrichment in  
339 neurons expressing TBR1 and BCL11B (also known as CTIP2), markers of layer 5 and 6,  
340 respectively, in WDR62 compared to the Iso iPSC progeny (Figure 5C). Taken together, these  
341 results indicate that the mutation results in neuronal fate commitment imbalance, rather than a  
342 generalized maturation impairment.

343 We then investigated neuronal lineage composition at DIV80. We analyzed the general maturation  
344 state by staining with the pan-neuronal marker RBFOX3 (also known as NeuN) and TUBB3, to  
345 estimate total neurite-occupied area, an indicator of neuronal differentiation (Figure 5D). Compared  
346 with Iso counterparts, WDR62 iPSC progeny contained fewer RBFOX3<sup>+</sup> neurons, even in the  
347 absence of noticeable differences in the neurite-occupied area (Figure 5D). We also examined  
348 overall layer identity at DIV80 by quantifying neurons expressing TBR1 and BCL11B. Although the  
349 percentage of BCL11B<sup>+</sup> cells was similar in WDR62 and Iso iPSC progeny (thus compensating the  
350 early imbalance), we observed a significant reduction in TBR1<sup>+</sup> cells in the former, reversing the  
351 premature differentiation observed at DIV40 (Figure 5D). We further noticed a decrease in SATB2-  
352 expressing layer 2/3 neurons in WDR62-iPSC progeny (Figure 5D). Lastly, we observed a reduction  
353 in GABAergic interneurons, but a normal proportion of GFAP-expressing astrocytes in WDR62-iPSC  
354 derivatives (Figure 5D). Together, these results strongly suggest neural lineage alterations  
355 associated with the WDR62 mutation and a subtle maturation delay during differentiation, potentially  
356 recapitulating the neocortical layering abnormalities previously observed in MCPH patients and  
357 mouse models (Sgourdou et al., 2017).



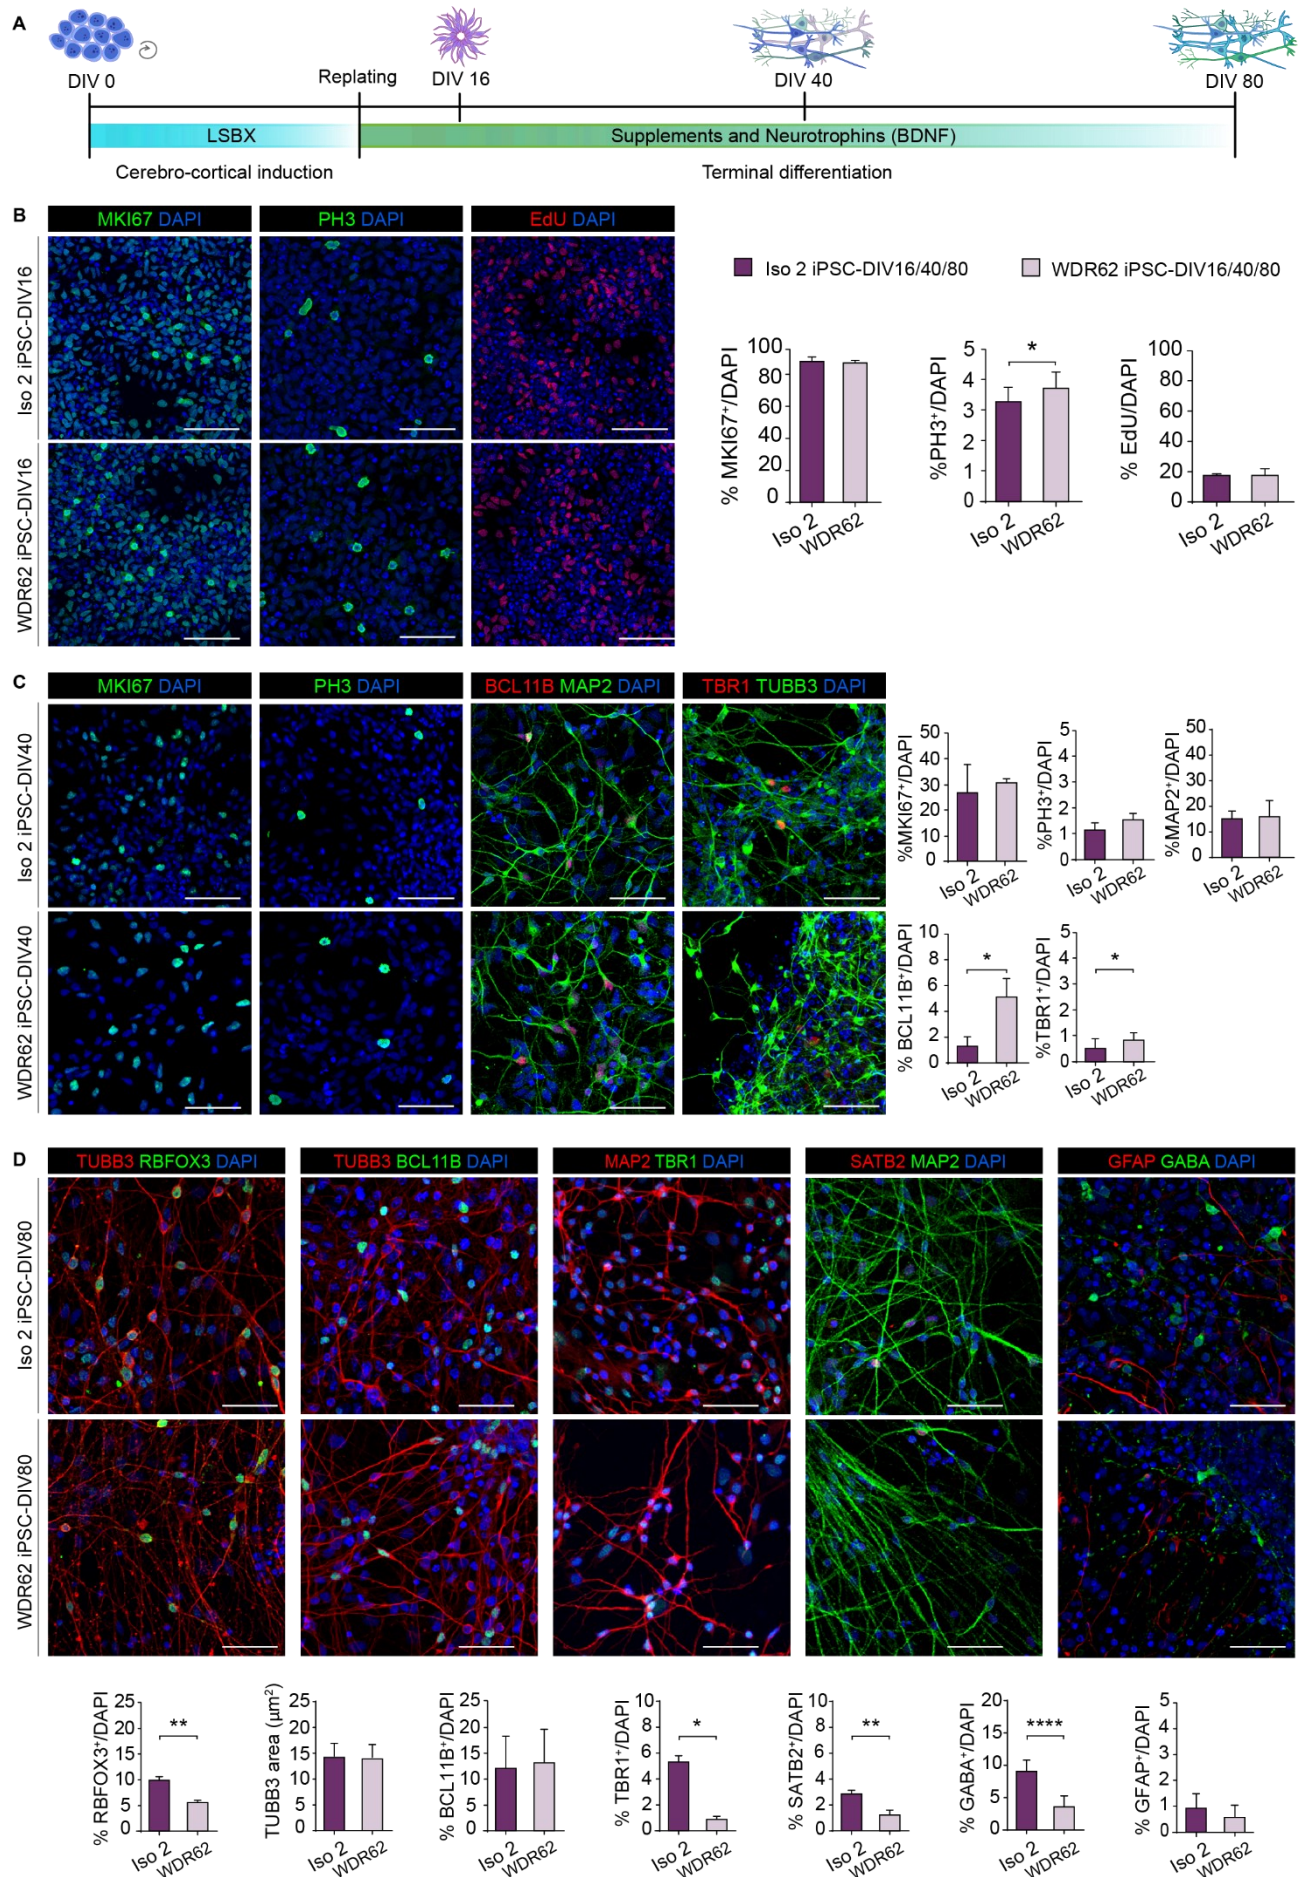

359 **Figure 5:** The D955AfsX112 mutation leads to lineage specification defects in iPSC-derived cerebro-cortical  
360 populations. A) Schematic illustration of the cerebro-cortical differentiation protocol. B) Immunofluorescence  
361 analysis for MKI67, PH3, and EdU in Iso and WDR62 iPSC neural progeny at DIV16. Quantitative analysis  
362 (right) shows no differences in the number of proliferating (MKI67<sup>+</sup>) or S-phase (EdU<sup>+</sup>) cells, but a significant  
363 increase in mitotic index (PH3<sup>+</sup>) in WDR62 iPSC neural progeny. Total cells N = 5222, p-value > 0.05, unpaired  
364 Student's t-test for MKI67; total cells N = 58313, p-value < 0.05, unpaired Student's t-test for PH3; total cells  
365 N = 3395, p-value > 0.05, unpaired Student's t-test for EdU>50%. C) Immunofluorescence analysis for MKI67,  
366 PH3, BCL11B, MAP2, and TBR1 in Iso 2 and WDR62 iPSCs at DIV40 (early-born neurons; left). Quantitative  
367 analysis (right) shows no significant differences in the number of proliferating cells (MKI67<sup>+</sup>) or mitotic index  
368 (PH3<sup>+</sup>) in Iso 2 and WDR62 iPSC-progeny. BCL11B<sup>+</sup> and TBR1<sup>+</sup> neurons are significantly enriched in WDR62  
369 compared to Iso 2 iPSC-DIV40 cultures. Quantification of MAP2<sup>+</sup> cells did not show differences. Total cells N  
370 = 18795, p-value > 0.05, unpaired Student's t-test, post hoc Welch's correction for MKI67; total cells N = 15423,  
371 p-value > 0.05, unpaired Student's t-test for PH3; total cells N = 40866, p-value < 0.05, unpaired Student's t-  
372 test for BCL11B; total cells N = 38412, p-value < 0.05, unpaired Student's t-test for TBR1; total cells N = 39595,  
373 p-value > 0.05, unpaired Student's t-test for MAP2. D) Representative confocal images for RBFOX3, TUBB3,  
374 BCL11B, TBR1, SATB2, GABA, and GFAP staining in Iso 2 and WDR62 iPSCs at DIV80 (top). Quantification  
375 (bottom) shows a decrease in RBFOX3<sup>+</sup>, TBR1<sup>+</sup> and SATB2<sup>+</sup> cells in WDR62 iPSC derived neurons, and a  
376 decrease in GABA<sup>+</sup> but not in GFAP<sup>+</sup> cells or neurite area (TUBB3<sup>+</sup>). Total cells N = 35207, p-value < 0.01,  
377 unpaired Student's t-test for RBFOX3; total fields measured, N = 6, p-value > 0.05, unpaired Student's t-test  
378 for TUBB3; total cells N = 29448, p-value > 0.05, unpaired Student's t-test for BCL11B; total cells N = 23396,  
379 p-value < 0.05, unpaired Student's t-test for TBR1; total cells N = 21843, p-value < 0.01, unpaired Student's t-  
380 test for SATB2; total cells N = 20375, p-value < 0.0001, unpaired Student's t-test for GABA; total cells N =  
381 20370, p-value > 0.05, unpaired Student's t-test for GFAP. Data are shown as mean ± SD. Scale bars: 10 μm.

382

## 383 Discussion

384 WDR62 is a spindle pole associated protein with key functions in NPC mitotic progression during  
385 cortical development. Recessive mutations in WDR62 account for the second most common cause  
386 of MCPH, a genetic neurodevelopmental disorder characterized by a spectrum of severe brain  
387 malformations and intellectual disability (Bilgüvar et al., 2010; Nicholas et al., 2010; Yu et al., 2010).

388 In this study, we investigated the impact of a C-terminal truncating mutation (D955AfsX112) in  
389 WDR62 (Sgourdou et al., 2017) on human cortical development employing patient iPSCs, which we  
390 used to derive NES cells and, through directed differentiation, mature cerebro-cortical neurons, and  
391 glia (Abdullah et al., 2017; Baggiani et al., 2020; Dell' Amico et al., 2021). To date, human iPSC-  
392 derived NES cells and neurons have been employed in mechanistic studies of several  
393 neurodevelopmental disorders, including the CEDNIK syndrome, characterized by cerebral  
394 dysgenesis (Morelli et al., 2021), Machado–Joseph disease (spinocerebellar ataxia 3) (Koch et al.,  
395 2011), and Zika virus-induced microcephaly (Lottini et al., 2022; Onorati et al., 2016) . NES cells

396 have also been explored as means of cell therapy approaches after spinal cord injury (Dell'Anno et  
397 al., 2018).

398 Here, through analyses of iPSC-derived NES cells and mature neurons harboring the D955AfsX112  
399 mutation and isogenic-corrected counterparts, we found that: i) mutant WDR62 fails to localize to  
400 the spindle poles during mitosis; ii) patient-derived iPS-NES cells exhibit shorter primary cilia and  
401 significantly smaller spindle angles, defects that likely contribute to the previously observed  
402 impairment in cell cycle progression; iii) the mutation leads to lineage specification defects in iPSC-  
403 derived cerebro-cortical neurons; iv) during the interphase-to-mitosis transition, WDR62 translocates  
404 from the Golgi apparatus to the spindle poles in a microtubule-dependent manner; and v)  
405 pharmacological disruption of microtubules mimics the effects of the genetic mutation and prevents  
406 WDR62 shuttling from the Golgi to the spindle poles. WDR62 contains a WD40-repeat region at its  
407 N-terminus and several regulatory domains at the C-terminal half and has cell cycle dependent  
408 functions. Even though AURKA-mediated phosphorylation of its N-terminus is required for WDR62  
409 accumulation to the spindle poles, spindle pole localization is disrupted both by N- (Lim et al., 2015)  
410 and C-terminal (Farang et al., 2013; Nicholas et al., 2010) mutations. The D955AfsX112 truncating  
411 mutation (Sgourdou et al., 2017) investigated in this study is expected to disrupt the AURKA binding  
412 domain (aa 621-1138) (Chen et al., 2014), as well as the JNK1 phosphorylation site (T1053)  
413 previously reported to diminish WDR62 association with the microtubules (Lim et al., 2015). Here we  
414 show that, in mitotic WDR62 iPSCs as well as in WDR62 iPS-NES cells, WDR62 fails to localize to  
415 the spindle poles, in line with other reports (Farang et al., 2013; Nicholas et al., 2010). The interaction  
416 with AURKA, however, appears preserved, even if weaker, at least in a heterologous system upon  
417 overexpression. Importantly, restoration of the correct WDR62 sequence through genome editing  
418 reverted the mutant phenotype, allowing relocation of WDR62 to the spindle poles during mitosis,  
419 and supporting the causal association between the identified mutation and the phenotype.

420 Since nocodazole-mediated microtubular disruption mimics in Iso iPS-NES cells the pattern  
421 observed for mutant WDR62, we are prompted to assume that the C-terminus likely regulates  
422 microtubules interaction, which is required for WDR62 translocation to the spindle poles. Indeed,  
423 although microtubule binding is thought to be mediated by the N-terminus (Lim et al., 2015), our work  
424 suggests that the C-terminus is also needed, even if the mechanism remains unknown. This is also  
425 in agreement with observations by Lim et al., 2015 (Lim et al., 2015) that the C-terminus MCPH-  
426 associated mutations fail to localize WDR62 to spindle microtubules.

427 Here, we also provide evidence for WDR62 localization at the Golgi apparatus during interphase in  
428 human WDR62 as well as Iso iPS-NES cells and in human fetal telencephalon, reminiscent of  
429 previous observations in HeLa cells (Nicholas et al., 2010; Yu et al., 2010). Notably, several  
430 syndromes caused by genetic defects affecting Golgi-related proteins present with microcephaly,  
431 corpus callosum agenesis or thinning, and neurological defects (Banne et al., 2013; Dimitrov et al.,



432 2009). Moreover, the disruption – especially during neurogenic processes – of Golgi-associated  
433 proteins which are also involved in cell cycle regulation or cellular polarity/microtubule organization  
434 lead to disorders underlain by lack of neurons/neuronal migration defects (e.g., MCPH3 (Wang et  
435 al., 2010) and MCPH17 (Camera et al., 2008; H. Li et al., 2016)).

436 Even though the mechanism(s) leading to loss of spindle pole localization are yet to be precisely  
437 determined, our findings in WDR62 iPS-NES cells indicate a general cell cycle regulation impairment  
438 and cell cycle re-entry failure in neural progenitors. This altered behavior becomes more evident  
439 after inducing cell cycle arrest. Taken together with similar observations in patient skin fibroblasts  
440 (Sgourdou et al., 2017), our findings provide support for the role of WDR62 in cell cycle regulation  
441 and, by extension, neocortico-genesis. Our findings of smaller spindle angle in WDR62 iPS-NES cells  
442 may in turn reflect defective control and timing of cell fate determination (Fish et al., 2006; Lesage  
443 et al., 2010; Lizarraga et al., 2010). In addition, we report that WDR62 iPS-NES cells harbor shorter  
444 primary cilia, which are known to play important roles in cortical development (Liu et al., 2021).  
445 Indeed, shorter cilia could explain the disrupted mitotic progression we observed in WDR62 iPS-  
446 NES cells (Kasahara & Inagaki, 2021). Zhang and colleagues (Zhang et al., 2019) previously  
447 reported interactions of the N-terminus of WDR62 with the CEP170-KIF2A pathway in promoting  
448 cilium disassembly in neural progenitors. The longer primary cilia these authors observed in WDR62  
449 KO cerebral organoids (Zhang et al., 2019) could be due to the complete deletion of WDR62, which  
450 has pleiotropic actions. We speculate that the shorter primary cilia we observe in WDR62 iPS-NES  
451 cells might reflect disruption in the assembly, rather than the disassembly of the primary cilium,  
452 considering that the mutation under study results in C-terminal truncation (Shohayeb et al., 2020).

453 It is not surprising that cell cycle impairment in neural progenitors constitutes the substrate for altered  
454 neurogenic processes, ultimately resulting in MCPH (Jayaraman et al., 2018). Indeed, during  
455 directed cerebro-cortical differentiation, we observed increased mitotic index in WDR62 iPSC neural  
456 cultures at DIV16. Moreover, we observed an enrichment in BCL11B<sup>+</sup> and TBR1<sup>+</sup> cells in WDR62  
457 iPSC-DIV40 neurons, indicating altered neurogenic trajectories. Surprisingly, this did not appear to  
458 be coupled with premature neuronal maturation (measured by MAP2 positivity), suggesting incorrect  
459 cell fate acquisition/neurogenic timing rather than generalized premature differentiation. Of note, late  
460 progenitors were reported to be primarily affected in a mouse model homozygous for a trapped  
461 Wdr62 allele leading to the expression of a fusion WDR62 (a.a. 1-870)-beta-galactosidase protein  
462 (Sgourdou et al., 2017).

463 At late stages (DIV80), the WDR62 iPSC-neuronal progeny consisted of fewer overall mature  
464 (RBFOX3<sup>+</sup>) neurons, as well as fewer deep (TBR1<sup>+</sup>) and upper (SATB2<sup>+</sup>) layer neurons; however,  
465 the earlier imbalance in the number of BCL11B<sup>+</sup> and TBR1<sup>+</sup> neurons appeared to have resolved.  
466 Further hints of neurogenesis impairment can be found in GABAergic neuron population, which is  
467 reduced in WDR62 iPSC-DIV80. However, neither the area of neurite occupancy, which includes

468 length and neurite number, nor gliogenesis, appear to be affected by the WDR62 mutation. In  
469 contrast, the composition of Iso iPSC neural progeny was as expected and in agreement with  
470 previous reports (Shi et al., 2012).

471 Recently, Vargas-Hurtado et al., 2019 (Vargas-Hurtado et al., 2019) found that at early neurogenic  
472 stages, mitotic spindles display more astral microtubules and fewer spindle microtubules, whereas  
473 the opposite was observed at late neurogenic stages. Additionally, it has also been speculated that  
474 during neocortical development the centrosomal microtubule-organizing center (MTOC) undergoes  
475 different activation states during the transition from radial glial cells to migrating neuroblasts  
476 (Camargo Ortega et al., 2019; Camargo Ortega & Götz, 2022). Since WDR62 localizes to the Golgi  
477 apparatus, which is interconnected with centrosomal MTOC itself (Bornens, 2021), and physically  
478 interacts with CDK5RAP2/CEP170/CEP63 (Kodani et al., 2015), localized at the centrosomes of  
479 neural stem cells (O'Neill et al., 2022) (Huang et al., 2021) it is indeed reasonable to speculate that  
480 during the transition from early to late neurogenic stages, WDR62 is involved in the switch in spindle  
481 morphology and in the regulation of neural stem cell differentiation, through interactions with  
482 centrosomal MTOC proteins.

483 Thus, loss of function of WDR62 may cause altered neurogenic trajectories at the different stages,  
484 eventually altering the final neuronal output observed in the MCPH associated with WDR62  
485 mutations.

486 Together, these findings indicate that the D955AfsX112 mutation in WDR62 results in incorrect  
487 neuronal cell fate commitment secondary to neural progenitor defects, in line with other reports  
488 (Sgourdou et al., 2017; Zhang et al., 2019). Our study also provides evidence that WDR62 is  
489 localized to the Golgi apparatus during interphase in human iPS-NES cells in vitro as well as in the  
490 developing human forebrain, reminiscent of previous reports in HeLa cells (Nicholas et al., 2010; Yu  
491 et al., 2010). A physical interaction of WDR62 with the Golgi protein GOLGA6L2 has also been  
492 reported in Bioplex, a database of human protein-protein interactions generated by affinity  
493 purification mass spectroscopy (Huttlin et al., 2015, 2017, 2021).

494 Our observations suggest a dynamic pattern of WDR62 shuttling from the Golgi to the spindle poles  
495 which is microtubule-dependent, and impaired upon microtubule de-stabilization by nocodazole. Our  
496 findings also suggest that the mutation impairs normal shuttling from the Golgi apparatus, thus  
497 explaining the lack of WDR62 localization at the spindle poles during mitosis. Of note, the  
498 D955AfsX112 mutation does not appear to impair the WDR62 interactions with spindle pole binding  
499 partners, supporting the hypothesis that shuttling from the Golgi apparatus is microtubule dependent.

500 In conclusion, the study of a C-terminal truncating mutation through iPSC-derived models allowed  
501 an in-depth and broader appreciation of the molecular mechanisms underlying WDR62-related  
502 microcephaly and, more generally, of MCPH etiology.

## 503 **Materials and Methods**

### 504 Ethical statement

505 All cell work was performed according to NIH guide-lines for the acquisition and distribution of human  
506 tissue for biomedical research purposes and with approval by the Human Investigation Committee  
507 and Institutional Ethics Committee of each institute from which the samples were obtained  
508 (University of Pisa Review No. 29/2020 and Yale No. 9406007680). Appropriate informed consent  
509 was obtained, and all available non-identifying information was recorded for each specimen. The  
510 tissue was handled in accordance with the ethical guidelines and regulations for the research use of  
511 human brain tissue set forth by the NIH and the WMA Declaration of Helsinki. The human fetal brain  
512 sections used in this study were previously obtained by Bocchi et al., 2021 (Bocchi et al., 2021) and  
513 derived from post-mortem specimens as approved by University of Cambridge and Addenbrooke's  
514 Hospital in Cambridge (protocol 96/85).

515

### 516 Description of the mutation

517 The mutation under study was identified in the index case NG1406-1 and described in Sgourdou et  
518 al., 2017 (Sgourdou et al., 2017). Briefly, analysis of whole exome sequencing data detected a novel  
519 homozygous frameshift mutation, D955AfsX112, caused by a 4 bp deletion in exon 23 of WDR62.  
520 This mutation leads to the generation of a premature stop codon at position 1067 producing a C-  
521 terminally truncated peptide (Sgourdou et al., 2017).

522

### 523 iPSC culture and maintenance

524 Reprogramming of patient-derived fibroblasts (NG1406-1) was performed via episomal  
525 reprogramming vectors - pCXLEhOCT3/4-shp53-F, pCXLE-hSK, pCXLE-hUL (Sgourdou et al.,  
526 2017). Human iPSCs were cultured as previously described (Sousa et al., 2017). Briefly, cells were  
527 seeded on Matrigel-coated culture plates (Cat: #356234, Corning, 1:60) and maintained in StemFlex  
528 Basal medium (Thermo Fisher Scientific; # A3349201) or Essential 8™ Medium (Thermo Fisher  
529 Scientific, # A2858501). Cells were typically passaged with EDTA (0.5 mM) at room temperature  
530 (RT). After 3-5 min of incubation, the EDTA solution was removed and cells were gently detached  
531 from the dish with a small volume of medium, generating clumps of 6-8 cells. In standard conditions  
532 (37°C, 5% CO<sub>2</sub>), iPSC colonies typically grow within 4-5 days.

533

### 534 CRISPR/Cas9 genome editing: isogenic line generation

535

536 CRISPR/Cas9 technology was used to generate isogenic lines (Skarnes et al., 2019):  $1.5 \times 10^6$   
537 WDR62 iPSCs (clone 1b2-1) were nucleofected with pre-mixed 8  $\mu$ g of synthetic chemically-modified  
538 sgRNA\_1 (Synthego), 200 pmol/ $\mu$ l of single strand donor oligonucleotide (ssODN; IDT) together with  
539 20  $\mu$ g of HiFi Cas9 Nuclease V3 (Cat: #1081060, IDT) using Amaxa™ 4D-Nucleofector™ (Cat:  
540 #AAF-1002B, Lonza) transfection system with Primary Cell Optimization 4D-Nucleofector X Kit (Cat:  
541 #V4XP-9096, Lonza) in P2 buffer – program DS-150.

542 After nucleofection, cells were counted and assessed for viability with trypan blue (cell death around  
543 18%), seeded onto Matrigel-coated culture plates supplemented with 10  $\mu$ M Y-27632 (Cat: #72308,  
544 StemCell Technologies) and incubated at 32°C (5% CO<sub>2</sub>) for 2 days. This passage was instrumental  
545 to increase the rate of homologous recombination (Guo et al., 2018). The day after nucleofection,  
546 cell medium was replaced to remove Y-27632. Two days later, cells were detached and plated at  
547 low density in 60 cm<sup>2</sup> Petri-dishes pre-coated with Matrigel and cultured for 15 days, until cell-  
548 colonies were ready to be picked. The three clonal iPSC lines Iso 1, Iso 2, and Iso 3 were selected  
549 and fully characterized. No interclonal variability was observed in the different assays. The specific  
550 Iso iPSC line used for each assay is indicated the figures.

551 To assess WDR62 sequence restoration, single clonal populations were first screened through  
552 melting curve analysis (Erali et al., 2008) performed on a CFX96-BioRad cyler. WDR62\_F1 and  
553 WDR62\_R1 primers were used in combination and samples were prepared using the SensiFast™  
554 HRM kit for RT-qPCR - melt curve reaction as follows. Amplification phase: Initial denaturation: 95°C  
555 5s; Denaturation: 95°C 10s; Annealing: 60°C 20s; Extension: 72°C 20s; Cycles number: 40. Melting  
556 phase: 95°C 30s. Melt curve 65°C to 95°C, increment 0.1°C – 5s.

557 The relevant portion of genomic DNA from selected clones was amplified by PCR using  
558 WDR62\_GF1 and WDR62\_GR1 primers, with the following conditions: Initial denaturation: 95°C 2  
559 min; Denaturation: 98°C 20s; Annealing: 55°C 30s; Extension: 72°C 1 min; Final extension: 72°C; 5  
560 min. Cycle number: 30. Finally, the genotype was confirmed by Sanger sequencing. Sequences for  
561 genome editing (5'-3'): sgRNA\_1: GAAGTGACAGTCACAGGGAC; ssODN:  
562 GCCAGTGAGCTCATCTACTCTCTGGAGGCAGAAGTGACAGTCACAGGGACAGACAGGTG  
563 GGTGTCCTTTCCACAAGGGAGCCTTAGTTGGAGGAACCCCGAGCTG Primer sequences (5'-3'):  
564 Melting analysis: F1: CTCTGGAGGCAGAAGTGACAG R1: CTTGGTGGAAAGGACACCCAC.  
565 PCR: GF1: ACTGGGTTTCCTATTCTTGAAGTTG GR1: AGGACTTCAGCTGGAGACTCAAC.  
566 Sequencing: SF1: TGTGCTGTCTTCCCATAGTC; SR1: CCCATCCAGGCCTCAACTGTC

567

## 568 Generation of cerebro-neocortical neurons

569 Mature cortical neurons were generated from iPSCs through an optimized cerebro-cortical  
570 differentiation protocol, based on a dual SMAD inhibition strategy (Chambers et al., 2009; Shi et al.,

571 2012). As previously described (Sousa et al., 2017), iPSCs were dissociated into a single-cell  
572 suspension with Accutase (Corning, #25-058-CI) pre-warmed at 37°C, and plated onto Matrigel-  
573 coated 6 well-plates at high density ( $0.7 - 2 \times 10^5$  cells/cm<sup>2</sup>) in StemFlex basal media supplemented  
574 with Y-27632 (10µM). When they reached a confluent state, maintenance medium was replaced with  
575 neural induction medium [1:1 DMEM/F-12 (Thermo Fisher Scientific, #31330095) and Neurobasal™  
576 medium (Thermo Fisher Scientific, #21103049) supplemented with N-2 (1:100, Gibco, #17502-048),  
577 B-27 (1:50, Thermo Fisher Scientific, #17504-044), 20 µg/ml insulin (Sigma-Aldrich, #I9278-5ML),  
578 L-glutamine (1:100, Thermo Fisher Scientific, #25030-081), MEM non-essential amino acids (1:100,  
579 Gibco, #11140-050) and 2-mercaptoethanol (1:1000, Thermo Fisher Scientific, #31350010). For  
580 cerebro-cortical induction (LSBX), 100 nM of LDN-193189 (STEMCELL Technologies, #72144), 10  
581 µM of SB-431542 (Merck, #616464-5MG) and 2 µM of XAV939 (STEMCELL Technologies, #72674)  
582 were added to induce cerebro-cortical differentiation. Induction medium was replaced daily until day  
583 11. For terminal differentiation, cells were dissociated at day 12 with Accutase and replated onto  
584 Poly-D-Lysine (Sigma, #P6407, 10 µg/ml)/Laminin (Invitrogen, #23017-015, 3 µg/ml) coated  
585 chamber slides at the density of  $8 \times 10^4$  cells in terminal differentiation medium containing  
586 Neurobasal™ supplemented with N-2 (1:100), B-27 (1:50), L-glutamine (1:100), BDNF (30 ng/ml,  
587 R&D Systems, #248-DB025), and Y-27632 (10 µM) to increase cell viability. Culture media were  
588 partially replaced every 3-4 days until day 80.

589

#### 590 NES cell generation

591 To obtain NES cells, at the end of the neuroinduction phase (day 12),  $2 \times 10^6$  cells were replated onto  
592 POLFN-coated 6-well plates (0,01% of Poly-L-ornithine, Sigma, #P4957; 5 µg/ml Laminin; 1 µg/ml  
593 Fibronectin, Corning, #354008) in NES medium containing DMEM/F-12 supplemented with B-27  
594 (1:1000), N-2 (1:100), 20 ng/ml of FGF-2 (Gibco, #13256 029), 20 ng/ml of EGF (Gibco, #PHG0311),  
595 glucose (1.6 g/L), 20 µg/ml insulin and 5 ng/ml of BDNF. NES cells were then cultured as previously  
596 reported (Dell'Anno et al., 2018); to preserve optimal growth properties, the medium was replaced  
597 every 2-3 days and cells passaged 1:2 or 1:3 weekly with 0.25% Trypsin/EDTA (Thermo Fisher  
598 Scientific, #25200-056) pre-warmed at 37°C.

599

#### 600 NES cell synchronization

601 For efficient synchronization, NES cells were seeded onto POLFN-coated coverslips in a 48-well  
602 plate at a density of  $10^5$  cells/cm<sup>2</sup>. To induce prometaphase arrest (T1), cells were rinsed once with  
603 D-PBS (Sigma-Aldrich, # D8537) and cultured in NES medium containing 100 ng/ml nocodazole  
604 (Millipore Sigma, #M1404) for 16 h. Then, cells were fixed with 4% formaldehyde (FA) for 20 min at  
605 25°C.

606 For cell cycle re-entry analysis (T2), after 16 h of treatment, nocodazole was removed and  
607 synchronized NES cells were rinsed once with D-PBS, released in NES medium for 1 h and then  
608 fixed in 4% FA for immunofluorescence analysis. For mitotic index and mitotic figure distribution  
609 analysis cells were classified following PH3 staining.

610

#### 611 Microtubule de-polymerization assay

612 To induce microtubule de-polymerization, NES cells were first plated onto POLFN-coated coverslips  
613 in a 48-well plate at the density of  $10^5$  cells/cm<sup>2</sup>. The day after, 5  $\mu$ M nocodazole was added to cell  
614 culture medium for 1 h; the cells were then rinsed once with D-PBS and fixed (4% FA for 20 min at  
615 25°C) for immunofluorescence analysis.

616

#### 617 Mitotic spindle angle and inter-centrosomal distance estimation

618 Confocal images of NES cells immunostained with the pericentrosomal marker PCTN were acquired  
619 with a pre-determined Z-stack step-size of 300 nm and elaborated with ImageJ software (Schneider  
620 et al., 2012) (developed by National Institute of Health; <https://imagej.nih.gov/ij>). Mitotic spindle angle  
621 ( $\theta$ ) was calculated as follows:  $\theta = \arctan(h/D)$ , with “h” as the distance between centrosomes on Y-  
622 axis and “D” as the distance between centrosomes on X-axis, manually traced (edge-to-edge  
623 distance of PCTN signal). Inter-centrosomal distance (ICD) was calculated as follows:  $ICD = D/\cos$   
624 ( $\theta$ ) (see Figure 2D for reference).

625

#### 626 Primary cilium length

627 Serial optical Z-stack with a step-size of 300 nm were used to create Z-projections (maximum  
628 intensity projection) of primary cilia for a minimum of 50 cells per genotype. Single cilium length was  
629 measured using “NeuronJ” plugin of Image J (Meijering et al., 2004). Briefly, after selecting the first  
630 pixel mid-point at the cilium peri-nuclear edge, short subsequent segments were traced manually  
631 following cilium shape until the last pixel mid-point. Cilia were measured regardless of cell cycle  
632 phase, excluding mitosis.

633

#### 634 Quantitative real-time PCR

635 RT-qPCR was performed to quantify WDR62 mRNA in Iso and WDR62 iPS-NES cells cultures. iPS-  
636 NES cells were plated in 6-well plates and lysates were collected in RNAProtect® Cell Reagent  
637 (QIAGEN, #76526) to stabilize the RNA. Subsequently, RNA purification was performed applying



638 RNAeasy® Protect Cell Mini Kit (QIAGEN, #74134) and RNase-Free DNase set (QIAGEN, #79254).  
639 cDNA was synthesized using GoScript™ Reverse Transcription System (Promega, #A5001)  
640 according to the manufacturer's instructions. PCR was performed using QuantStudio™ 3 Real-  
641 Time PCR System (Applied Biosystems™, A28137) with SensiMix™SYBR®No-ROX kit (Meridian  
642 BIOSCIENCE, #QT650-05). Thermal cycling conditions: denaturation at 95°C for 10 min and 40  
643 cycles of 95°C for 15s and 60°C for 1 min. Data are expressed as fold change in WDR62 gene  
644 expression relative to GAPDH housekeeping gene, according to the  $2^{-\Delta\Delta CT}$  method. Three technical  
645 replicates were performed for each experiment. qPCR primers (5'-3') qF\_WDR62:  
646 GGAGGAAGAGTGTGAGCCAG; qR\_WDR62: CTTGCCGTTGGTTAGCAGG.

647

#### 648 EdU labelling

649 The Click-iT EdU AlexaFluor 594 Imaging kit (Invitrogen, #C10339) was used to perform EdU  
650 labelling on iPSC cultures at DIV16, according to the manufacturer's instructions. 3.5 h after EdU  
651 incubation, cells were fixed, imaged with confocal microscopy, and processed using ImageJ. For  
652 quantitative analysis, cells with signal intensity above 50% were considered.

653

#### 654 Immunostaining assay

655 After cell fixation (4% FA for 20 min at 25°C or methanol for 7 min at -20°C for the CDK5RAP2  
656 antibody), 3 washes with D-PBSX (1% vol/vol TritonX-100 - Sigma #T9284-500ml - in D-PBS 1x)  
657 were performed. Then, samples were incubated at RT in permeabilization solution (5% vol/vol  
658 TritonX-100 in D-PBS Ca<sup>2+</sup>/Mg<sup>2+</sup>) for 10 min and then in blocking solution (5% FBS, 3% vol/vol  
659 TritonX-100 in PBS Ca<sup>2+</sup>/Mg<sup>2+</sup>) for at least 1 h (RT). Subsequently, samples were incubated in the  
660 antibody solution (3% FBS, 2% vol/vol TritonX-100 in D-PBS Ca<sup>2+</sup>/Mg<sup>2+</sup>) with primary antibodies  
661 overnight (ON) at 4°C. The next day, samples were washed 3 times with D-PBSX before incubation  
662 with the corresponding secondary antibodies (all diluted 1:500) and DAPI (Sigma, #32670-25mg) for  
663 1 h (RT). Samples were mounted with Aqua-Poly/Mount (VWR, #87001-902) on microscope slides  
664 for confocal microscopy.

665 For immunohistochemistry, human fetal brain sections were first thawed at RT, washed once with  
666 D-PBS for 10 min and permeabilized with 0.5% Triton X-100 in D-PBS for 10 min. Sections were  
667 then washed in D-PBS and treated with Sodium Citrate based-R-buffer A (EMS, #62706-10) in 2100-  
668 Retriever (EMS, #62706) at 120°C for 20 min. After antigen retrieval, the sections were washed with  
669 D-PBS and blocked with 5% horse serum (Thermo Fisher, #26050070), 1% BSA in D-PBS with 0.3%  
670 Triton X-100 for 1 h (RT). Primary antibodies were diluted in blocking solution and incubated at 4 °C  
671 ON. The following day the sections were washed three times in D-PBSX (1% vol/vol TritonX-100 in



672 D-PBS 1x). Secondary antibodies and DAPI were diluted in blocking solution for 1 h (RT). Then the  
673 sections were washed twice in D-PBSX and once in D-PBS and finally mounted with Aqua-  
674 Poly/Mount on microscope slides for confocal microscopy.

675

#### 676 Co-localization analysis

677 Following immunofluorescent staining, co-localization analysis for WDR62 and GOLGA1 (also  
678 known as Golgin97) signals was performed using the DiAna plugin (Gilles et al., 2017) (ImageJ) on  
679 300 nm Z-stack confocal images. This plugin allows to calculate co-localization percentage between  
680 two selected objects measuring the distance (on 3 dimensions) of every single pixel unit – defined  
681 by size through threshold setting – constituting the object itself. To calculate WDR62-Golgi co-  
682 localization, Golgi objects identified by GOLGA1 signal (“object A”) were selected as Regions of  
683 Interest (ROI) and the same ROI has been identified on the WDR62 channel (“object B”). Then, for  
684 each A and B object pair, co-localization of A volume on B was calculated. Images were acquired  
685 with a Nikon A1 Confocal Microscope and NIS-Elements AR 4.20.03 64-bit software. Confocal  
686 images were then processed with ImageJ and Adobe Photoshop 2020.

687

#### 688 Cell culture, transfection, immunoprecipitation, and Western blotting

689 To generate the expression vectors used for co-IP and over-expression experiments, full-length  
690 cDNA fragments encoding Myc-hCDK5RAP2, Myc-hAURKA, Myc-hTPX2, or hWDR62-FLAG, were  
691 amplified by PCR and inserted into a CAG-promoter plasmid backbone by In-Fusion HD (Takara). A  
692 plasmid encoding hWDR62-FLAG was generated by amplifying hWDR62-FLAG by PCR; the  
693 fragment was excised using XhoI and NotI and ligated into a CAG-promoter plasmid. A plasmid  
694 encoding hWDR62D955A-FLAG was generated by overlap extension PCR cloning using two  
695 products (a.a. 1-955 of hWDR62D955A and 955-1067 of hWDR62D955A-FLAG), excised using  
696 XhoI and NotI, and ligated into a CAG-promoter plasmid. The plasmid expressing GALT1-mWasabi  
697 was generated by inserting the fragment corresponding to amino-acids 1-61 of hB4GALT1-mWasabi  
698 into a CAG-promoter plasmid.

699 HEK293T cells, maintained in DMEM/10% FBS, were transiently transfected using Lipofectamine  
700 3000 (Invitrogen) according to the manufacturer's instructions. Cell lysates were prepared 24 h after  
701 transfection using lysis buffer [Tris-HCl 50mM (pH7.4), 1mM EDTA, 150 mM NaCl, 1% NP40, and  
702 protease inhibitors]. For immunoprecipitation, cell lysates were incubated with FLAG antibody for 1  
703 h at 4°C, followed by incubation with Dynabeads Protein G (Invitrogen # 10003D) ON at 4°C. The  
704 immune precipitates were washed three times with cold TBST and analyzed by Western blotting.

705 Over-expression experiments were performed through forward transfection. CTRL iPS-NES cells,  
706 maintained in NES medium without antibiotics, were transiently transfected using Lipofectamine  
707 2000 (Invitrogen) according to the manufacturer's instructions. Cells ( $0.7 \times 10^5$ ) were co-transfected  
708 with 0.5  $\mu\text{g}$  of hWDR62-FLAG (or hWDR62\*D955A-FLAG) and GALT1-mWasabi in 1:1 molar ratio.  
709 48 h after transfection cells were fixed with 4% FA at 25°C for 20 min and imaged with confocal  
710 microscopy.

711

712 Cell culture, transfection, and Western blotting

713  $1 \times 10^6$  iPS NES cells, maintained in NES medium without antibiotics, were transiently transfected  
714 using Lipofectamine 2000 as described above. Cells were lysed 48 h after transfection using lysis  
715 buffer [RIPA buffer (Sigma, #R0278), protease (Roche, #11836170001), and phosphatase (Roche,  
716 #04906837001) inhibitors]. After DC assay (Bio-Rad, # 5000111) for protein quantification, samples  
717 were analyzed by Western blotting (anti-WDR62 and anti-TUBA1A antibodies).

718

719 Quantitative and statistical analysis

720 Nuclei and nuclear markers were quantified manually with the "Cell counter" plugin (ImageJ) or  
721 automatically through the "Analyze particles" function (ImageJ) defining a  $15 \mu\text{m}^2$  particle-size  
722 threshold. Values identify mean and error bars represent standard deviation (S.D.) and a significance  
723 level of at least  $p < 0.05$  (\* $p < 0.05$ ; \*\* $p < 0.01$ ; \*\*\* $p < 0.001$ ; \*\*\*\* $p < 0.0001$ ). All experiments were  
724 performed at least in triplicate. The size of the population (n) is reported for each experiment in the  
725 figure legend. Counts and analyses were performed blinded to conditions or genotypes. Graphs  
726 were generated with GraphPad Prism 7.00 software.

727

| <b>Antibody</b>   | <b>Brand, Cat. number</b> | <b>Dilution (IF)</b>     |
|-------------------|---------------------------|--------------------------|
| ARL13B            | Invitrogen, PA5-61840     | 1:500                    |
| BCL11B            | Abcam, ab18465            | 1:500                    |
| CDK5RAP2          | Bethyl Lab, IHC-00063-T   | 1:500                    |
| CETN2             | Biolegend, W16110A        | 1:500                    |
| FOXP1             | Abcam, ab18259            | 1:500                    |
| GABA              | Sigma, A2052              | 1:1500                   |
| GFAP              | Sigma, g3893              | 1:500                    |
| GM 130 (GOLGA2)   | Abcam, ab275987           | 1:100                    |
| Alexa Fluor 488   |                           |                          |
| Golgin97 (GOLGA1) | Invitrogen, A-21270       | 1:200                    |
| MKI67             | Abcam, ab16667            | 1:300                    |
| MAP2              | Millipore, ab5622         | 1:1000                   |
| PCTN              | Abcam, ab28144            | 1:1000                   |
| PH3               | Millipore, 06-570         | 1:500                    |
| RBFOX3            | Millipore, ABN78          | 1:500                    |
| SATB2             | Genway, satba4b109        | 1:200                    |
| TBR1              | Abcam, ab183032           | 1:100                    |
| TUBA1A            | Cell signaling, 3873      | 1:2000 IF,<br>1:8000 WB  |
| TUBA1A            | Bio-Rad, mca77g           | 1: 500                   |
| TUBB3             | Sigma, T8578              | 1: 500                   |
| WDR62             | Bethyl Lab, A301-560A     | 1:500 IF,<br>1:2000 WB   |
| DYKDDDDK [FLAG]   | Sigma, F3165              | 1:8000 IF,<br>1:10000 WB |
| DYKDDDDK [FLAG]   | Invitrogen, MA1-142       | 1: 1000 IP               |
| Giantin (GOLGB1)  | Bio Legend, 909701        | 1:1000                   |
| LMNA              | Cell Signaling, 2025      | 1:200                    |

730

731 **Acknowledgements:** We thank Catello Guida, Camilla Focacci, and Guglielma De Matienzo  
732 (University of Pisa, Department of Biology) for technical support and imaging analysis and Francesco  
733 Olimpico (Fondazione Pisana per la Scienza) for assistance in cell culture.

734

735 **Competing interests:** The authors declare no competing interests.

736

## 737 References

738

739 Abdullah, U., Farooq, M., Mang, Y., Marriam Bakhtiar, S., Fatima, A., Hansen, L., Kjaer, K. W., Larsen, L. A.,  
740 Faryal, S., Tommerup, N., & Mahmood Baig, S. (2017). A novel mutation in CDK5RAP2 gene causes  
741 primary microcephaly with speech impairment and sparse eyebrows in a consanguineous Pakistani  
742 family. *European Journal of Medical Genetics*, 60(12), 627–630.  
743 <https://doi.org/10.1016/j.ejmg.2017.07.017>

744 Ayala, I., Mascanzoni, F., & Colanzi, A. (2020). The Golgi ribbon: Mechanisms of maintenance and  
745 disassembly during the cell cycle. *Biochemical Society Transactions*, 48(1), 245–256.  
746 <https://doi.org/10.1042/BST20190646>

747 Baggiani, M., Dell'Anno, M. T., Pistello, M., Conti, L., & Onorati, M. (2020). Human Neural Stem Cell Systems  
748 to Explore Pathogen-Related Neurodevelopmental and Neurodegenerative Disorders. *Cells*, 9(8), 1893.  
749 <https://doi.org/10.3390/cells9081893>

750 Banne, E., Atawneh, O., Henneke, M., Brockmann, K., Gärtner, J., Elpeleg, O., & Edvardson, S. (2013). West  
751 syndrome, microcephaly, grey matter heterotopia and hypoplasia of corpus callosum due to a novel  
752 ARFGEF2 mutation. *Journal of Medical Genetics*, 50(11), 772–775. <https://doi.org/10.1136/jmedgenet-2013-101752>

754 Bettencourt-Dias, M., Hildebrandt, F., Pellman, D., Woods, G., & Godinho, S. A. (2011). Centrosomes and cilia  
755 in human disease. *Trends in Genetics*, 27(8), 307–315. <https://doi.org/10.1016/j.tig.2011.05.004>

756 Bilgüvar, K., Öztürk, A. K., Louvi, A., Kwan, K. Y., Choi, M., Tatli, B., Yalnizoğlu, D., Tüysüz, B., Çağlayan, A.  
757 O., Gökben, S., Kaymakçalan, H., Barak, T., Bakircioğlu, M., Yasuno, K., Ho, W., Sanders, S., Zhu, Y.,  
758 Yilmaz, S., Dinçer, A., ... Günel, M. (2010). Whole-exome sequencing identifies recessive WDR62  
759 mutations in severe brain malformations. *Nature*, 467(7312), 207–210.  
760 <https://doi.org/10.1038/nature09327>

761 Bocchi, V. D., Conforti, P., Vezzoli, E., Besusso, D., Cappadona, C., Lischetti, T., Galimberti, M., Ranzani, V.,  
762 Bonnal, R. J. P., Simone, M. De, Rossetti, G., He, X., Kamimoto, K., Espuny-Camacho, I., Faedo, A.,  
763 Gervasoni, F., Vuono, R., Morris, S. A., Chen, J., ... Barker, R. A. (2021). The coding and long noncoding  
764 single-cell atlas of the developing human fetal striatum. *Science*, 372(6542).  
765 <https://doi.org/10.1126/science.abf5759>

766 Bogoyevitch, M. A., Yeap, Y. Y. C., Qu, Z., Ngoei, K. R., Yip, Y. Y., Zhao, T. T., Heng, J. I., & Ng, D. C. H.  
767 (2012). WD40-repeat protein 62 is a JNK-phosphorylated spindle pole protein required for spindle  
768 maintenance and timely mitotic progression. *Journal of Cell Science*, 125(21), 5096–5109.  
769 <https://doi.org/10.1242/jcs.107326>

- 770 Bond, J., Roberts, E., Springell, K., Lizarraga, S., Scott, S., Higgins, J., Hampshire, D. J., Morrison, E. E., Leal,  
771 G. F., Silva, E. O., Costa, S. M. R., Baralle, D., Raponi, M., Karbani, G., Rashid, Y., Jafri, H., Bennett,  
772 C., Corry, P., Walsh, C. A., & Woods, C. G. (2005). A centrosomal mechanism involving CDK5RAP2 and  
773 CENPJ controls brain size. *Nature Genetics*, 37(4), 353–355. <https://doi.org/10.1038/ng1539>
- 774 Bornens, M. (2021). Centrosome organization and functions. *Current Opinion in Structural Biology*, 66, 199–  
775 206. <https://doi.org/10.1016/j.sbi.2020.11.002>
- 776 Camargo Ortega, G., Falk, S., Johansson, P. A., Peyre, E., Broix, L., Sahu, S. K., Hirst, W., Schlichthaerle, T.,  
777 de Juan Romero, C., Draganova, K., Vinopal, S., Chinnappa, K., Gavranovic, A., Karakaya, T.,  
778 Steininger, T., Merl-Pham, J., Feederle, R., Shao, W., Shi, S.-H., ... Götz, M. (2019). The centrosome  
779 protein AKNA regulates neurogenesis via microtubule organization. *Nature*, 567(7746), 113–117.  
780 <https://doi.org/10.1038/s41586-019-0962-4>
- 781 Camargo Ortega, G., & Götz, M. (2022). Centrosome heterogeneity in stem cells regulates cell diversity.  
782 *Trends in Cell Biology*. <https://doi.org/10.1016/j.tcb.2022.03.004>
- 783 Camera, P., Schubert, V., Pellegrino, M., Berto, G., Vercelli, A., Muzzi, P., Hirsch, E., Altruda, F., Dotti, C. G.,  
784 & Di Cunto, F. (2008). The RhoA-associated protein Citron-N controls dendritic spine maintenance by  
785 interacting with spine-associated Golgi compartments. *EMBO Reports*, 9(4), 384–392.  
786 <https://doi.org/10.1038/embor.2008.21>
- 787 Castiglioni, V., Faedo, A., Onorati, M., Bocchi, V. D., Li, Z., Iennaco, R., Vuono, R., Bulfamante, G. P., Muzio,  
788 L., Martino, G., Sestan, N., Barker, R. A., & Cattaneo, E. (2019). Dynamic and cell-specific DACH1  
789 expression in human neocortical and striatal development. *Cerebral Cortex*, 29(5), 2115–2124.  
790 <https://doi.org/10.1093/cercor/bhy092>
- 791 Chambers, S. M., Fasano, C. A., Papapetrou, E. P., Tomishima, M., Sadelain, M., & Studer, L. (2009). Highly  
792 efficient neural conversion of human ES and iPS cells by dual inhibition of SMAD signaling. *Nature*  
793 *Biotechnology*, 27(3), 275–280. <https://doi.org/10.1038/nbt.1529>
- 794 Chen, J. F., Zhang, Y., Wilde, J., Hansen, K. C., Lai, F., & Niswander, L. (2014). Microcephaly disease gene  
795 Wdr62 regulates mitotic progression of embryonic neural stem cells and brain size. *Nature*  
796 *Communications*, 5(1), 3885. <https://doi.org/10.1038/ncomms4885>
- 797 Cole, N. B., Smith, C. L., Sciaky, N., Terasaki, M., Edidin, M., & Lippincott-Schwartz, J. (1996). Diffusional  
798 mobility of Golgi proteins in membranes of living cells. *Science*, 273(5276), 797–801.  
799 <https://doi.org/10.1126/science.273.5276.797>
- 800 Degl'innocenti, E., Poloni, T. E., Medici, V., Recupero, L., Dell'amico, C., Borello, U., Mazzanti, C. M., Onorati,  
801 M., & Dell'Anno, M. T. (2022). Centrin 2: a novel marker of mature and neoplastic human astrocytes.  
802 *Frontiers in Cellular Neuroscience*, 0, 164. <https://doi.org/10.3389/FNCEL.2022.858347>
- 803 Dell' Amico, C., Tata, A., Pellegrino, E., Onorati, M., & Conti, L. (2021). Genome editing in stem cells for genetic  
804 neurodisorders. *Progress in Molecular Biology and Translational Science*, 182, 403–438.  
805 <https://doi.org/10.1016/bs.pmbts.2020.12.006>
- 806 Dell'Anno, M. T., Wang, X., Onorati, M., Li, M., Talpo, F., Sekine, Y., Ma, S., Liu, F., Cafferty, W. B. J., Sestan,  
807 N., & Strittmatter, S. M. (2018). Human neuroepithelial stem cell regional specificity enables spinal cord  
808 repair through a relay circuit. *Nature Communications*, 9(1), 3419. <https://doi.org/10.1038/s41467-018-05844-8>
- 810 Dimitrov, A., Paupe, V., Gueudry, C., Sibarita, J.-B., Raposo, G., Vielemeyer, O., Gilbert, T., Csaba, Z., Attie-  
811 Bitach, T., Cormier-Daire, V., Gressens, P., Rustin, P., Perez, F., & El Ghouzzi, V. (2009). The gene  
812 responsible for Dyggve-Melchior-Clausen syndrome encodes a novel peripheral membrane protein  
813 dynamically associated with the Golgi apparatus. *Human Molecular Genetics*, 18(3), 440–453.  
814 <https://doi.org/10.1093/hmg/ddn371>
- 815 Erali, M., Voelkerding, K. V., & Wittwer, C. T. (2008). High resolution melting applications for clinical laboratory  
816 medicine. *Experimental and Molecular Pathology*, 85(1), 50–58.  
817 <https://doi.org/10.1016/j.yexmp.2008.03.012>

- 818 Farag, H. G., Froehler, S., Oexle, K., Ravindran, E., Schindler, D., Staab, T., Huebner, A., Kraemer, N., Chen,  
819 W., & Kaindl, A. M. (2013). Abnormal centrosome and spindle morphology in a patient with autosomal  
820 recessive primary microcephaly type 2 due to compound heterozygous WDR62 gene mutation. *Orphanet*  
821 *Journal of Rare Diseases*, 8(1), 178. <https://doi.org/10.1186/1750-1172-8-178>
- 822 Fish, J. L., Kosodo, Y., Enard, W., Pääbo, S., & Huttner, W. B. (2006). Aspm specifically maintains symmetric  
823 proliferative divisions of neuroepithelial cells. *Proceedings of the National Academy of Sciences of the*  
824 *United States of America*, 103(27), 10438–10443. <https://doi.org/10.1073/pnas.0604066103>
- 825 Gabriel, E., Ramani, A., Altinisik, N., & Gopalakrishnan, J. (2020). Human Brain Organoids to Decode  
826 Mechanisms of Microcephaly. *Frontiers in Cellular Neuroscience*, 14.  
827 <https://doi.org/10.3389/fncel.2020.00115>
- 828 Gilles, J.-F., Dos Santos, M., Boudier, T., Bolte, S., & Heck, N. (2017). DiAna, an ImageJ tool for object-based  
829 3D co-localization and distance analysis. *Methods*, 115, 55–64.  
830 <https://doi.org/https://doi.org/10.1016/j.ymeth.2016.11.016>
- 831 Guerreiro, A., De Sousa, F., Liaudet, N., Ivanova, D., Eskat, A., & Meraldi, P. (2021). Wdr62 localizes katanin  
832 at spindle poles to ensure synchronous chromosome segregation. *Journal of Cell Biology*, 220(8).  
833 <https://doi.org/10.1083/jcb.202007171>
- 834 Guo, Q., Mintier, G., Ma-Edmonds, M., Storton, D., Wang, X., Xiao, X., Kienzle, B., Zhao, D., & Feder, J. N.  
835 (2018). “Cold shock” increases the frequency of homology directed repair gene editing in induced  
836 pluripotent stem cells. *Scientific Reports*, 8(1). <https://doi.org/10.1038/s41598-018-20358-5>
- 837 Holland, A. J., Lan, W., & Cleveland, D. W. (2010). Centriole duplication: A lesson in self-control. *Cell Cycle*,  
838 9(14), 2803–2808. <https://doi.org/10.4161/cc.9.14.12184>
- 839 Huang, J., Liang, Z., Guan, C., Hua, S., & Jiang, K. (2021). Wdr62 regulates spindle dynamics as an adaptor  
840 protein between tpx2/aurora a and katanin. *Journal of Cell Biology*, 220(8).  
841 <https://doi.org/10.1083/jcb.202007167>
- 842 Huttlin, E. L., Bruckner, R. J., Navarrete-Perea, J., Cannon, J. R., Baltier, K., Gebreab, F., Gygi, M. P.,  
843 Thornock, A., Zarraga, G., Tam, S., Szpyt, J., Gassaway, B. M., Panov, A., Parzen, H., Fu, S., Golbazi,  
844 A., Maenpaa, E., Stricker, K., Guha Thakurta, S., ... Gygi, S. P. (2021). Dual proteome-scale networks  
845 reveal cell-specific remodeling of the human interactome. *Cell*, 184(11), 3022-3040.e28.  
846 <https://doi.org/10.1016/j.cell.2021.04.011>
- 847 Huttlin, E. L., Bruckner, R. J., Paulo, J. A., Cannon, J. R., Ting, L., Baltier, K., Colby, G., Gebreab, F., Gygi, M.  
848 P., Parzen, H., Szpyt, J., Tam, S., Zarraga, G., Pontano-Vaites, L., Swarup, S., White, A. E., Schweppe,  
849 D. K., Rad, R., Erickson, B. K., ... Wade Harper, J. (2017). Architecture of the human interactome defines  
850 protein communities and disease networks. *Nature*, 545(7655), 505–509.  
851 <https://doi.org/10.1038/nature22366>
- 852 Huttlin, E. L., Ting, L., Bruckner, R. J., Gebreab, F., Gygi, M. P., Szpyt, J., Tam, S., Zarraga, G., Colby, G.,  
853 Baltier, K., Dong, R., Guarani, V., Vaites, L. P., Ordureau, A., Rad, R., Erickson, B. K., Wühr, M., Chick,  
854 J., Zhai, B., ... Gygi, S. P. (2015). The BioPlex Network: A Systematic Exploration of the Human  
855 Interactome. *Cell*, 162(2), 425–440. <https://doi.org/10.1016/j.cell.2015.06.043>
- 856 Jain, B. P., & Pandey, S. (2018). WD40 Repeat Proteins: Signalling Scaffold with Diverse Functions. *Protein*  
857 *Journal*, 37(5), 391–406. <https://doi.org/10.1007/s10930-018-9785-7>
- 858 Jayaraman, D., Bae, B.-I., & Walsh, C. A. (2018). The Genetics of Primary Microcephaly. *Annual Review of*  
859 *Genomics and Human Genetics*, 19(1), 177–200. <https://doi.org/10.1146/annurev-genom-083117-021441>
- 861 Kasahara, K., & Inagaki, M. (2021). Primary ciliary signaling: links with the cell cycle. *Trends in Cell Biology*,  
862 31(12), 954–964. <https://doi.org/10.1016/j.tcb.2021.07.009>
- 863 Koch, P., Breuer, P., Peitz, M., Jungverdorben, J., Kesavan, J., Poppe, D., Doerr, J., Ladewig, J., Mertens, J.,  
864 Tüting, T., Hoffmann, P., Klockgether, T., Evert, B. O., Wüllner, U., & Brüstle, O. (2011). Excitation-



- 865 induced ataxin-3 aggregation in neurons from patients with Machado-Joseph disease. *Nature*,  
866 *480*(7378), 543–546. <https://doi.org/10.1038/nature10671>
- 867 Kodani, A., Yu, T. W., Johnson, J. R., Jayaraman, D., Johnson, T. L., Al-Gazali, L., Sztriha, L., Partlow, J. N.,  
868 Kim, H., Krup, A. L., Dammermann, A., Krogan, N. J., Walsh, C. A., & Reiter, J. F. (2015a). Centriolar  
869 satellites assemble centrosomal microcephaly proteins to recruit CDK2 and promote centriole  
870 duplication. *ELife*, *4*. <https://doi.org/10.7554/eLife.07519>
- 871 Kodani, A., Yu, T. W., Johnson, J. R., Jayaraman, D., Johnson, T. L., Al-Gazali, L., Sztriha, L., Partlow, J. N.,  
872 Kim, H., Krup, A. L., Dammermann, A., Krogan, N. J., Walsh, C. A., & Reiter, J. F. (2015b). Centriolar  
873 satellites assemble centrosomal microcephaly proteins to recruit CDK2 and promote centriole  
874 duplication. *ELife*, *4*(AUGUST2015), 1–27. <https://doi.org/10.7554/eLife.07519>
- 875 Lancaster, M. A., Renner, M., Martin, C. A., Wenzel, D., Bicknell, L. S., Hurles, M. E., Homfray, T., Penninger,  
876 J. M., Jackson, A. P., & Knoblich, J. A. (2013). Cerebral organoids model human brain development and  
877 microcephaly. *Nature*, *501*(7467), 373–379. <https://doi.org/10.1038/nature12517>
- 878 Lesage, B., Gutierrez, I., Martí, E., & Gonzalez, C. (2010). Neural stem cells: the need for a proper orientation.  
879 *Current Opinion in Genetics & Development*, *20*(4), 438–442. <https://doi.org/10.1016/j.gde.2010.04.013>
- 880 Li, D., & Roberts, R. (2001). WD-repeat proteins: Structure characteristics, biological function, and their  
881 involvement in human diseases. *Cellular and Molecular Life Sciences*, *58*(14), 2085–2097.  
882 <https://doi.org/10.1007/PL00000838>
- 883 Li, H., Bielas, S. L., Zaki, M. S., Ismail, S., Farfara, D., Um, K., Rosti, R. O., Scott, E. C., Tu, S., Chi, N. C.,  
884 Gabriel, S., Erson-Omay, E. Z., Ercan-Sencicek, A. G., Yasuno, K., Çağlayan, A. O., Kaymakçalan, H.,  
885 Ekici, B., Bilguvar, K., Gunel, M., & Gleeson, J. G. (2016). Biallelic Mutations in Citron Kinase Link Mitotic  
886 Cytokinesis to Human Primary Microcephaly. *American Journal of Human Genetics*, *99*(2), 501–510.  
887 <https://doi.org/10.1016/j.ajhg.2016.07.004>
- 888 Li, M., Santpere, G., Kawasawa, Y. I., Evgrafov, O. V., Gulden, F. O., Pochareddy, S., Sunkin, S. M., Li, Z.,  
889 Shin, Y., Zhu, Y., Sousa, A. M. M., Werling, D. M., Kitchen, R. R., Kang, H. J., Pletikos, M., Choi, J.,  
890 Muchnik, S., Xu, X., Wang, D., ... Sestan, N. (2018). Integrative functional genomic analysis of human  
891 brain development and neuropsychiatric risks. *Science*, *362*(6420).  
892 <https://doi.org/10.1126/science.aat7615>
- 893 Li, R., Sun, L., Fang, A., Li, P., Wu, Q., & Wang, X. (2017). Recapitulating cortical development with organoid  
894 culture in vitro and modeling abnormal spindle-like (ASPM related primary) microcephaly disease. *Protein  
895 and Cell*, *8*(11), 823–833. <https://doi.org/10.1007/s13238-017-0479-2>
- 896 Lim, N. R., Yeap, Y. Y. C., Ang, C. S., Williamson, N. A., Bogoyevitch, M. A., Quinn, L. M., & Ng, D. C. H.  
897 (2016). Aurora A phosphorylation of WD40-repeat protein 62 in mitotic spindle regulation. *Cell Cycle*,  
898 *15*(3), 413–424. <https://doi.org/10.1080/15384101.2015.1127472>
- 899 Lim, N. R., Yeap, Y. Y. C., Zhao, T. T., Yip, Y. Y., Wong, S. C., Xu, D., Ang, C. S., Williamson, N. A., Xu, Z.,  
900 Bogoyevitch, M. A., & Ng, D. C. H. (2015). Opposing roles for JNK and Aurora A in regulating the  
901 association of WDR62 with spindle microtubules. *Journal of Cell Science*, *128*(3), 527–540.  
902 <https://doi.org/10.1242/jcs.157537>
- 903 Liu, S., Trupiano, M. X., Simon, J., Guo, J., & Anton, E. S. (2021). The essential role of primary cilia in cerebral  
904 cortical development and disorders. In G. J. Bashaw (Ed.), *Current Topics in Developmental Biology* (Vol.  
905 *142*, pp. 99–146). Academic Press. <https://doi.org/10.1016/bs.ctdb.2020.11.003>
- 906 Lizarraga, S. B., Margossian, S. P., Harris, M. H., Campagna, D. R., Han, A. P., Blevins, S., Mudbhary, R.,  
907 Barker, J. E., Walsh, C. A., & Fleming, M. D. (2010). Cdk5rap2 regulates centrosome function and  
908 chromosome segregation in neuronal progenitors. *Development*, *137*(11), 1907–1917.  
909 <https://doi.org/10.1242/dev.040410>
- 910 Lottini, G., Baggiani, M., Chesi, G., D’Orsi, B., Quaranta, P., Lai, M., Pancrazi, L., Onorati, M., Pistello, M.,  
911 Freer, G., & Costa, M. (2022). Zika virus induces FOXG1 nuclear displacement and downregulation in  
912 human neural progenitors. *Stem Cell Reports*. <https://doi.org/10.1016/j.stemcr.2022.05.008>



- 913 Lui, J. H., Hansen, D. V., & Kriegstein, A. R. (2011). Development and Evolution of the Human Neocortex.  
914 *Cell*, 146(1), 18–36. <https://doi.org/10.1016/j.cell.2011.06.030>
- 915 Matsui, Y., Nakayama, Y., Okamoto, M., Fukumoto, Y., & Yamaguchi, N. (2012). Enrichment of cell populations  
916 in metaphase, anaphase, and telophase by synchronization using nocodazole and blebbistatin: A novel  
917 method suitable for examining dynamic changes in proteins during mitotic progression. *European Journal*  
918 *of Cell Biology*, 91(5), 413–419. <https://doi.org/10.1016/j.ejcb.2011.12.008>
- 919 Meijering, E., Jacob, M., Sarria, J. C. F., Steiner, P., Hirling, H., & Unser, M. (2004). Design and Validation of  
920 a Tool for Neurite Tracing and Analysis in Fluorescence Microscopy Images. *Cytometry Part A*, 58(2),  
921 167–176. <https://doi.org/10.1002/cyto.a.20022>
- 922 Miyamoto, T., Akutsu, S. N., Fukumitsu, A., Morino, H., Masatsuna, Y., Hosoba, K., Kawakami, H., Yamamoto,  
923 T., Shimizu, K., Ohashi, H., & Matsuura, S. (2017). PLK1-mediated phosphorylation of WDR62/MCPH2  
924 ensures proper mitotic spindle orientation. *Human Molecular Genetics*, 26(22), 4429–4440.  
925 <https://doi.org/10.1093/hmg/ddx330>
- 926 Morelli, E., Speranza, E. A., Pellegrino, E., Beznoussenko, G. V., Carminati, F., Garré, M., Mironov, A. A.,  
927 Onorati, M., & Vaccari, T. (2021). Activity of the SNARE Protein SNAP29 at the Endoplasmic Reticulum  
928 and Golgi Apparatus. *Frontiers in Cell and Developmental Biology*, 9.  
929 <https://doi.org/10.3389/fcell.2021.637565>
- 930 Nicholas, A. K., Khurshid, M., Désir, J., Carvalho, O. P., Cox, J. J., Thornton, G., Kausar, R., Ansar, M., Ahmad,  
931 W., Verloes, A., Passemard, S., Misson, J. P., Lindsay, S., Gergely, F., Dobyns, W. B., Roberts, E.,  
932 Abramowicz, M., & Woods, C. G. (2010). WDR62 is associated with the spindle pole and is mutated in  
933 human microcephaly. *Nature Genetics*, 42(11), 1010–1014. <https://doi.org/10.1038/ng.682>
- 934 O'Neill, A. C., Uzbass, F., Antognolli, G., Merino, F., Draganova, K., Jäck, A., Zhang, S., Pedini, G., Schessner,  
935 J. P., Cramer, K., Schepers, A., Metzger, F., Esgleas, M., Smialowski, P., Guerrini, R., Falk, S., Feederle,  
936 R., Freytag, S., Wang, Z., ... Götz, M. (2022). Spatial centrosome proteome of human neural cells  
937 uncovers disease-relevant heterogeneity. *Science*, 376(6599). <https://doi.org/10.1126/science.abf9088>
- 938 Onorati, M., Castiglioni, V., Biasci, D., Cesana, E., Menon, R., Vuono, R., Talpo, F., Laguna Goya, R., Lyons,  
939 P. A., Bulfamante, G. P., Muzio, L., Martino, G., Toselli, M., Farina, C., A Barker, R., Biella, G., &  
940 Cattaneo, E. (2014). Molecular and functional definition of the developing human striatum. *Nature*  
941 *Neuroscience*, 17(12), 1804–1815. <https://doi.org/10.1038/nn.3860>
- 942 Onorati, M., Li, Z., Liu, F., Sousa, A. M. M., Nakagawa, N., Li, M., Dell'Anno, M. T., Gulden, F. O., Pochareddy,  
943 S., Tebbenkamp, A. T. N., Han, W., Pletikos, M., Gao, T., Zhu, Y., Bichsel, C., Varela, L., Szigeti-Buck,  
944 K., Lisgo, S., Zhang, Y., ... Sestan, N. (2016a). Zika Virus Disrupts Phospho-TBK1 Localization and  
945 Mitosis in Human Neuroepithelial Stem Cells and Radial Glia. *Cell Reports*, 16(10), 2576–2592.  
946 <https://doi.org/10.1016/j.celrep.2016.08.038>
- 947 Onorati, M., Li, Z., Liu, F., Sousa, A. M. M., Nakagawa, N., Li, M., Dell'Anno, M. T., Gulden, F. O., Pochareddy,  
948 S., Tebbenkamp, A. T. N., Han, W., Pletikos, M., Gao, T., Zhu, Y., Bichsel, C., Varela, L., Szigeti-Buck,  
949 K., Lisgo, S., Zhang, Y., ... Sestan, N. (2016b). Zika Virus Disrupts Phospho-TBK1 Localization and  
950 Mitosis in Human Neuroepithelial Stem Cells and Radial Glia. *Cell Reports*, 16(10), 2576–2592.  
951 <https://doi.org/10.1016/j.celrep.2016.08.038>
- 952 Phan, T. P., & Holland, A. J. (2021). Time is of the essence: The molecular mechanisms of primary  
953 microcephaly. *Genes and Development*, 35(23–24), 1551–1578.  
954 <https://doi.org/10.1101/GAD.348866.121>
- 955 Schneider, C. A., Rasband, W. S., & Eliceiri, K. W. (2012). NIH Image to ImageJ: 25 years of image analysis.  
956 *Nature Methods*, 9(7), 671–675. <https://doi.org/10.1038/nmeth.2089>
- 957 Sgourdou, P., Mishra-Gorur, K., Saotome, I., Henagariu, O., Tuysuz, B., Campos, C., Ishigame, K., Giannikou,  
958 K., Quon, J. L., Sestan, N., Caglayan, A. O., Gunel, M., & Louvi, A. (2017). Disruptions in asymmetric  
959 centrosome inheritance and WDR62-Aurora kinase B interactions in primary microcephaly. *Scientific*  
960 *Reports*, 7. <https://doi.org/10.1038/srep43708>

- 961 Shi, Y., Kirwan, P., & Livesey, F. J. (2012). Directed differentiation of human pluripotent stem cells to cerebral  
962 cortex neurons and neural networks. *Nature Protocols*, 7(10), 1836–1846.  
963 <https://doi.org/10.1038/nprot.2012.116>
- 964 Shohayeb, B., Ho, U., Yeap, Y. Y., Parton, R. G., Millard, S. S., Xu, Z., Piper, M., & Ng, D. C. H. (2020). The  
965 association of microcephaly protein WDR62 with CPAP/IFT88 is required for cilia formation and  
966 neocortical development. *Human Molecular Genetics*, 29(2), 248–263.  
967 <https://doi.org/10.1093/hmg/ddz281>
- 968 Shohayeb, B., Lim, N. R., Ho, U., Xu, Z., Dottori, M., Quinn, L., & Ng, D. C. H. (2018). The Role of WD40-  
969 Repeat Protein 62 (MCPH2) in Brain Growth: Diverse Molecular and Cellular Mechanisms Required for  
970 Cortical Development. *Molecular Neurobiology*, 55(7), 5409–5424. <https://doi.org/10.1007/s12035-017-0778-x>
- 972 Silbereis, J. C., Pochareddy, S., Zhu, Y., Li, M., & Sestan, N. (2016). The Cellular and Molecular Landscapes  
973 of the Developing Human Central Nervous System. *Neuron*, 89(2), 248–268.  
974 <https://doi.org/10.1016/j.neuron.2015.12.008>
- 975 Skarnes, W. C., Pellegrino, E., & McDonough, J. A. (2019). Improving homology-directed repair efficiency in  
976 human stem cells. *Methods*, 164–165, 18–28. <https://doi.org/10.1016/j.ymeth.2019.06.016>
- 977 Smith, T. F., Gaitatzes, C., Saxena, K., & Neer, E. J. (1999). The WD repeat: A common architecture for  
978 diverse functions. *Trends in Biochemical Sciences*, 24(5), 181–185. [https://doi.org/10.1016/S0968-0004\(99\)01384-5](https://doi.org/10.1016/S0968-0004(99)01384-5)
- 980 Sousa, A. M. M., Zhu, Y., Raghanti, M. A., Kitchen, R. R., Onorati, M., Tebbenkamp, A. T. N., Stutz, B., Meyer,  
981 K. A., Li, M., Kawasawa, Y. I., Liu, F., Perez, R. G., Mele, M., Carvalho, T., Skarica, M., Gulden, F. O.,  
982 Pletikos, M., Shibata, A., Stephenson, A. R., ... Sestan, N. (2017). Molecular and cellular reorganization  
983 of neural circuits in the human lineage. *Science*, 358(6366), 1027–1032.  
984 <https://doi.org/10.1126/science.aan3456>
- 985 Stirnimann, C. U., Petsalaki, E., Russell, R. B., & Müller, C. W. (2010). WD40 proteins propel cellular networks.  
986 *Trends in Biochemical Sciences*, 35(10), 565–574. <https://doi.org/10.1016/j.tibs.2010.04.003>
- 987 Sütterlin, C., & Colanzi, A. (2010). The Golgi and the centrosome: Building a functional partnership. *Journal of*  
988 *Cell Biology*, 188(5), 621–628. <https://doi.org/10.1083/jcb.200910001>
- 989 Taverna, E., Mora-Bermúdez, F., Strzyz, P. J., Florio, M., Icha, J., Haffner, C., Norden, C., Wilsch-Braüninger,  
990 M., & Huttner, W. B. (2016). Non-canonical features of the Golgi apparatus in bipolar epithelial neural  
991 stem cells. *Scientific Reports*, 6(1), 21206. <https://doi.org/10.1038/srep21206>
- 992 Thornton, G. K., & Woods, C. G. (2009). Primary microcephaly: do all roads lead to Rome? *Trends in Genetics*,  
993 25(11), 501–510. <https://doi.org/10.1016/j.tig.2009.09.011>
- 994 Vargas-Hurtado, D., Brault, J. B., Piolot, T., Leconte, L., Da Silva, N., Pannetier, C., Baffet, A., Marthiens, V.,  
995 & Basto, R. (2019). Differences in Mitotic Spindle Architecture in Mammalian Neural Stem Cells Influence  
996 Mitotic Accuracy during Brain Development. *Current Biology*, 29(18), 2993–3005.e9.  
997 <https://doi.org/10.1016/j.cub.2019.07.061>
- 998 Wang, Z., Wu, T., Shi, L., Zhang, L., Zheng, W., Qu, J. Y., Niu, R., & Qi, R. Z. (2010). Conserved motif of  
999 CDK5RAP2 mediates its localization to centrosomes and the Golgi complex. *Journal of Biological*  
1000 *Chemistry*, 285(29), 22658–22665. <https://doi.org/10.1074/jbc.M110.105965>
- 1001 Welburn, J. P. I., & Cheeseman, I. M. (2012). The microtubule-binding protein Cep170 promotes the targeting  
1002 of the kinesin-13 depolymerase Kif2b to the mitotic spindle. *Molecular Biology of the Cell*, 23(24), 4786–  
1003 4795. <https://doi.org/10.1091/mbc.E12-03-0214>
- 1004 Wilsch-Braüninger, M., & Huttner, W. B. (2021). Primary Cilia and Centrosomes in Neocortex Development.  
1005 *Frontiers in Neuroscience*, 15, 755867. <https://doi.org/10.3389/fnins.2021.755867>
- 1006 Woods, C. G., & Parker, A. (2013). Investigating microcephaly. *Archives of Disease in Childhood*, 98(9), 707–  
1007 713. <https://doi.org/10.1136/archdischild-2012-302882>

- 1008 Yiangou, L., Grandy, R. A., Morell, C. M., Tomaz, R. A., Osnato, A., Kadiwala, J., Muraro, D., Garcia-Bernardo,  
1009 J., Nakanoh, S., Bernard, W. G., Ortmann, D., McCarthy, D. J., Simoncic, I., Sinha, S., & Vallier, L. (2019).  
1010 Method to Synchronize Cell Cycle of Human Pluripotent Stem Cells without Affecting Their Fundamental  
1011 Characteristics. *Stem Cell Reports*, 12(1), 165–179. <https://doi.org/10.1016/j.stemcr.2018.11.020>
- 1012 Yu, T. W., Mochida, G. H., Tischfield, D. J., Sgaier, S. K., Flores-Sarnat, L., Sergi, C. M., Topçu, M., McDonald,  
1013 M. T., Barry, B. J., Felie, J. M., Sunu, C., Dobyns, W. B., Folkerth, R. D., Barkovich, A. J., & Walsh, C. A.  
1014 (2010). Mutations in WDR62, encoding a centrosome-associated protein, cause microcephaly with  
1015 simplified gyri and abnormal cortical architecture. *Nature Genetics*, 42(11), 1015–1020.  
1016 <https://doi.org/10.1038/ng.683>
- 1017 Zhang, W., Yang, S. L., Yang, M., Herrlinger, S., Shao, Q., Collar, J. L., Fierro, E., Shi, Y., Liu, A., Lu, H.,  
1018 Herring, B. E., Guo, M. L., Buch, S., Zhao, Z., Xu, J., Lu, Z., & Chen, J. F. (2019). Modeling microcephaly  
1019 with cerebral organoids reveals a WDR62–CEP170–KIF2A pathway promoting cilium disassembly in  
1020 neural progenitors. *Nature Communications*, 10(1). <https://doi.org/10.1038/s41467-019-10497-2>
- 1021

**Figure 1**

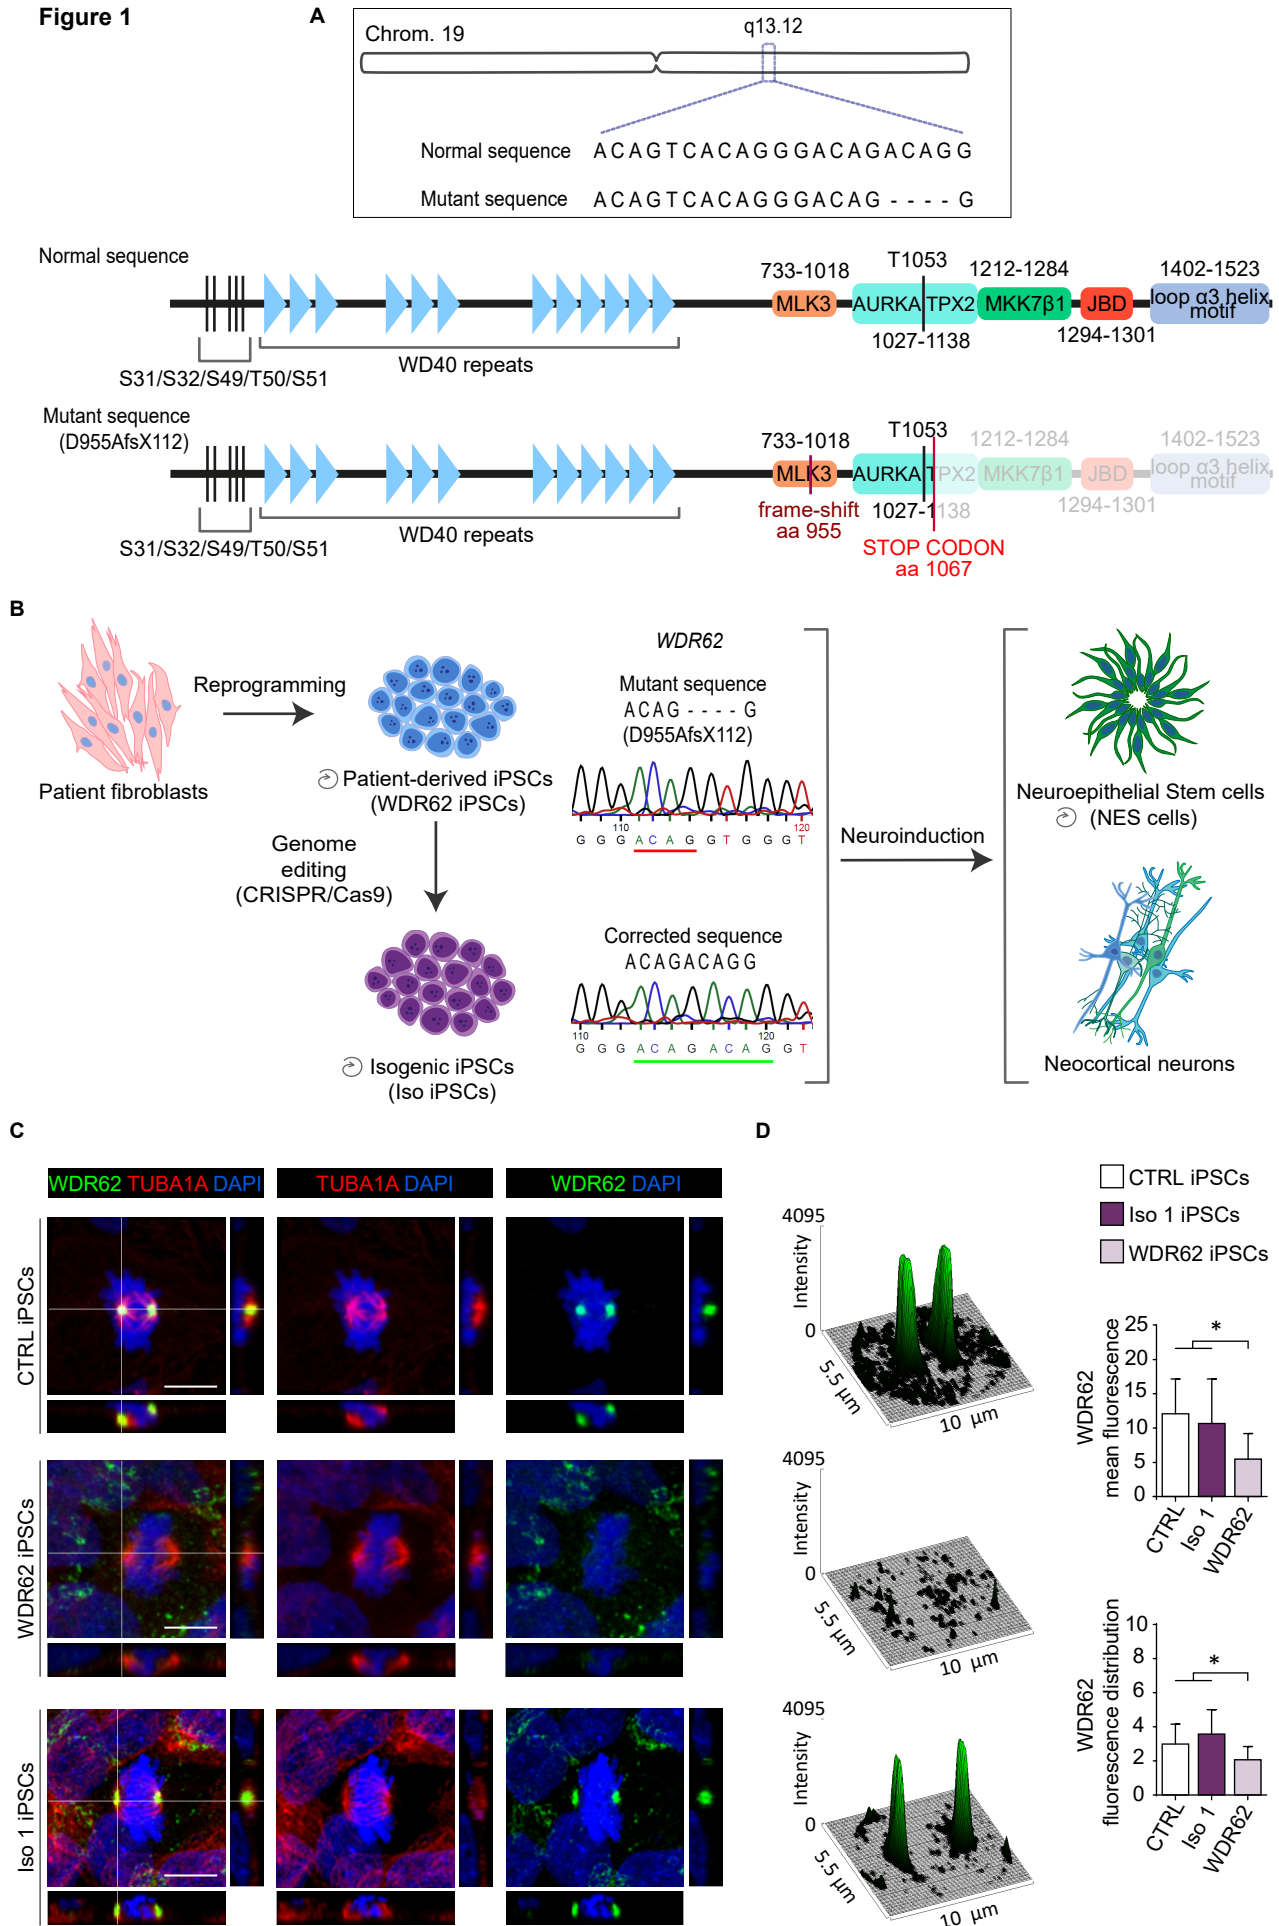

**Figure 2**

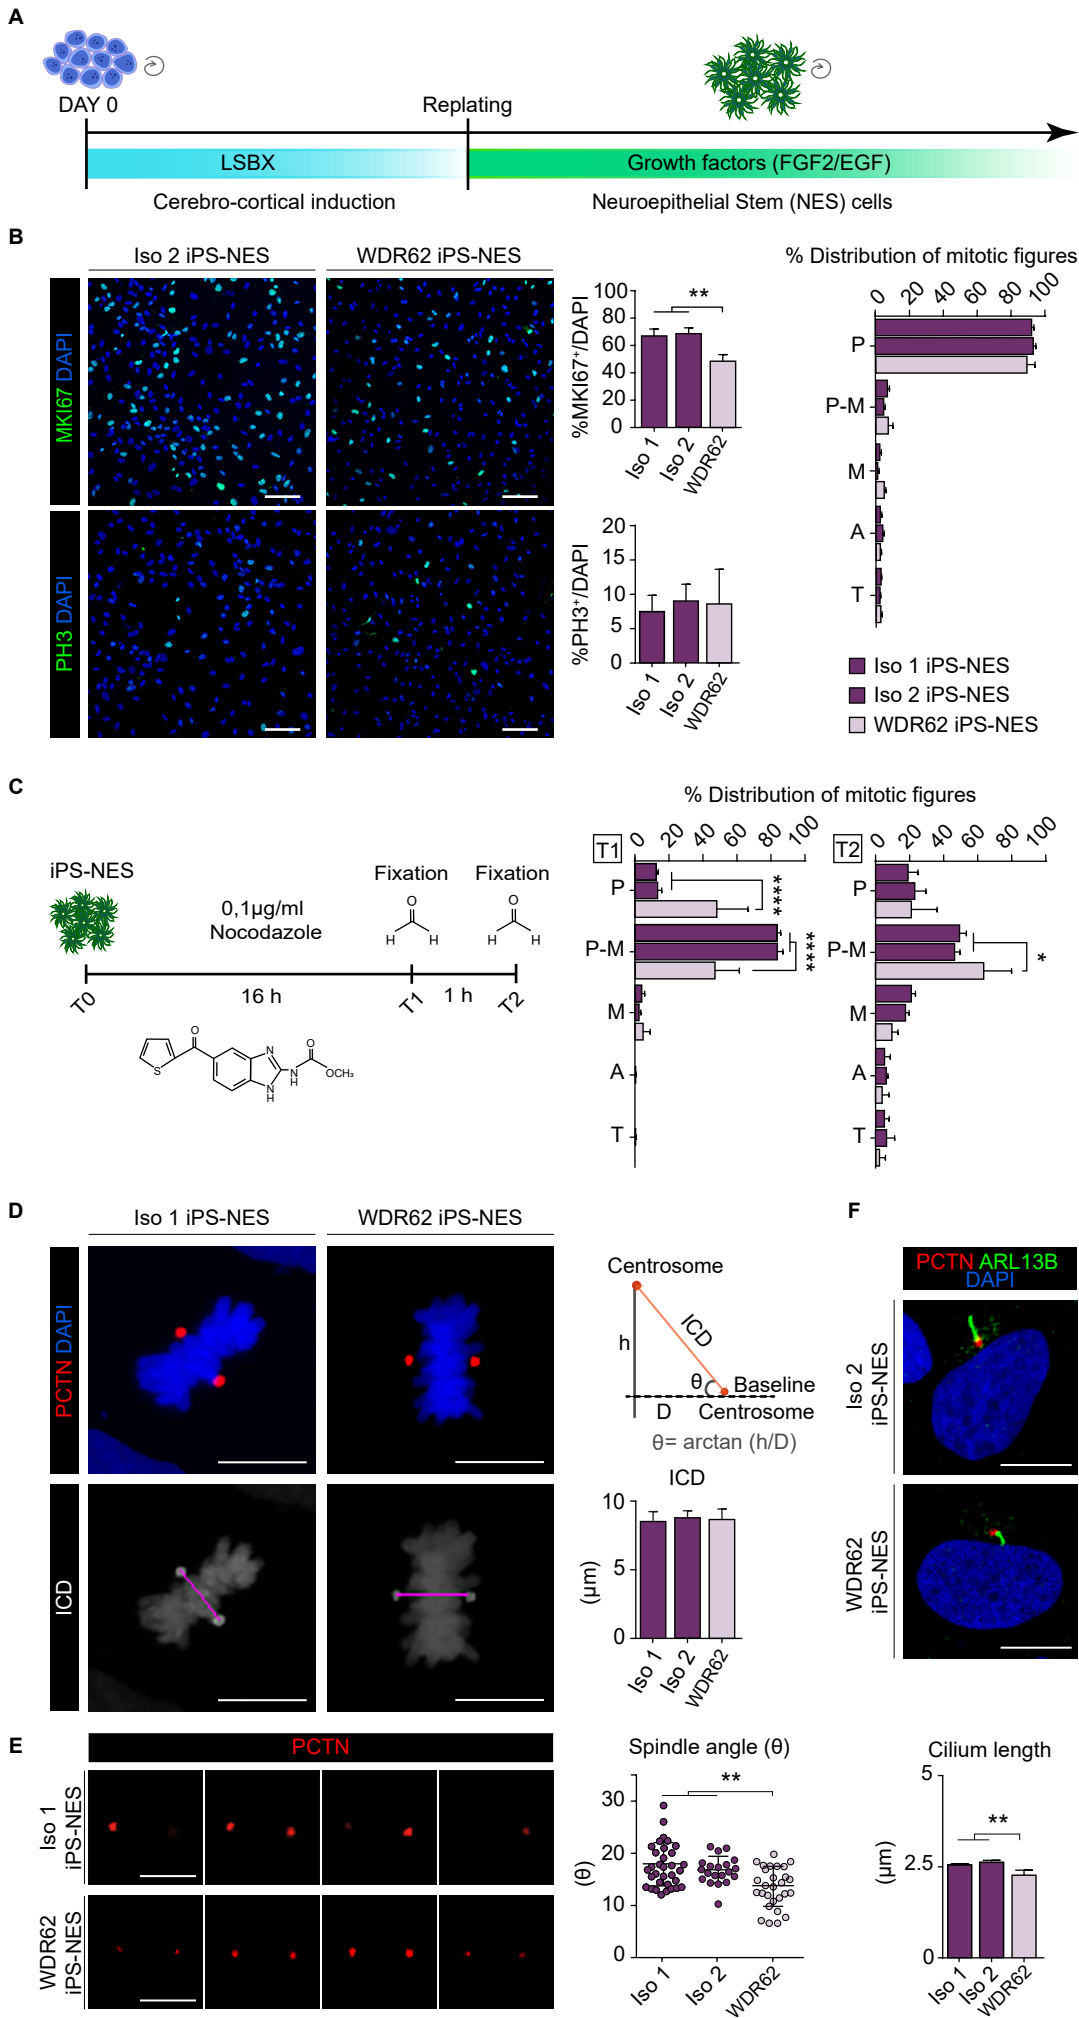



**Figure 3**

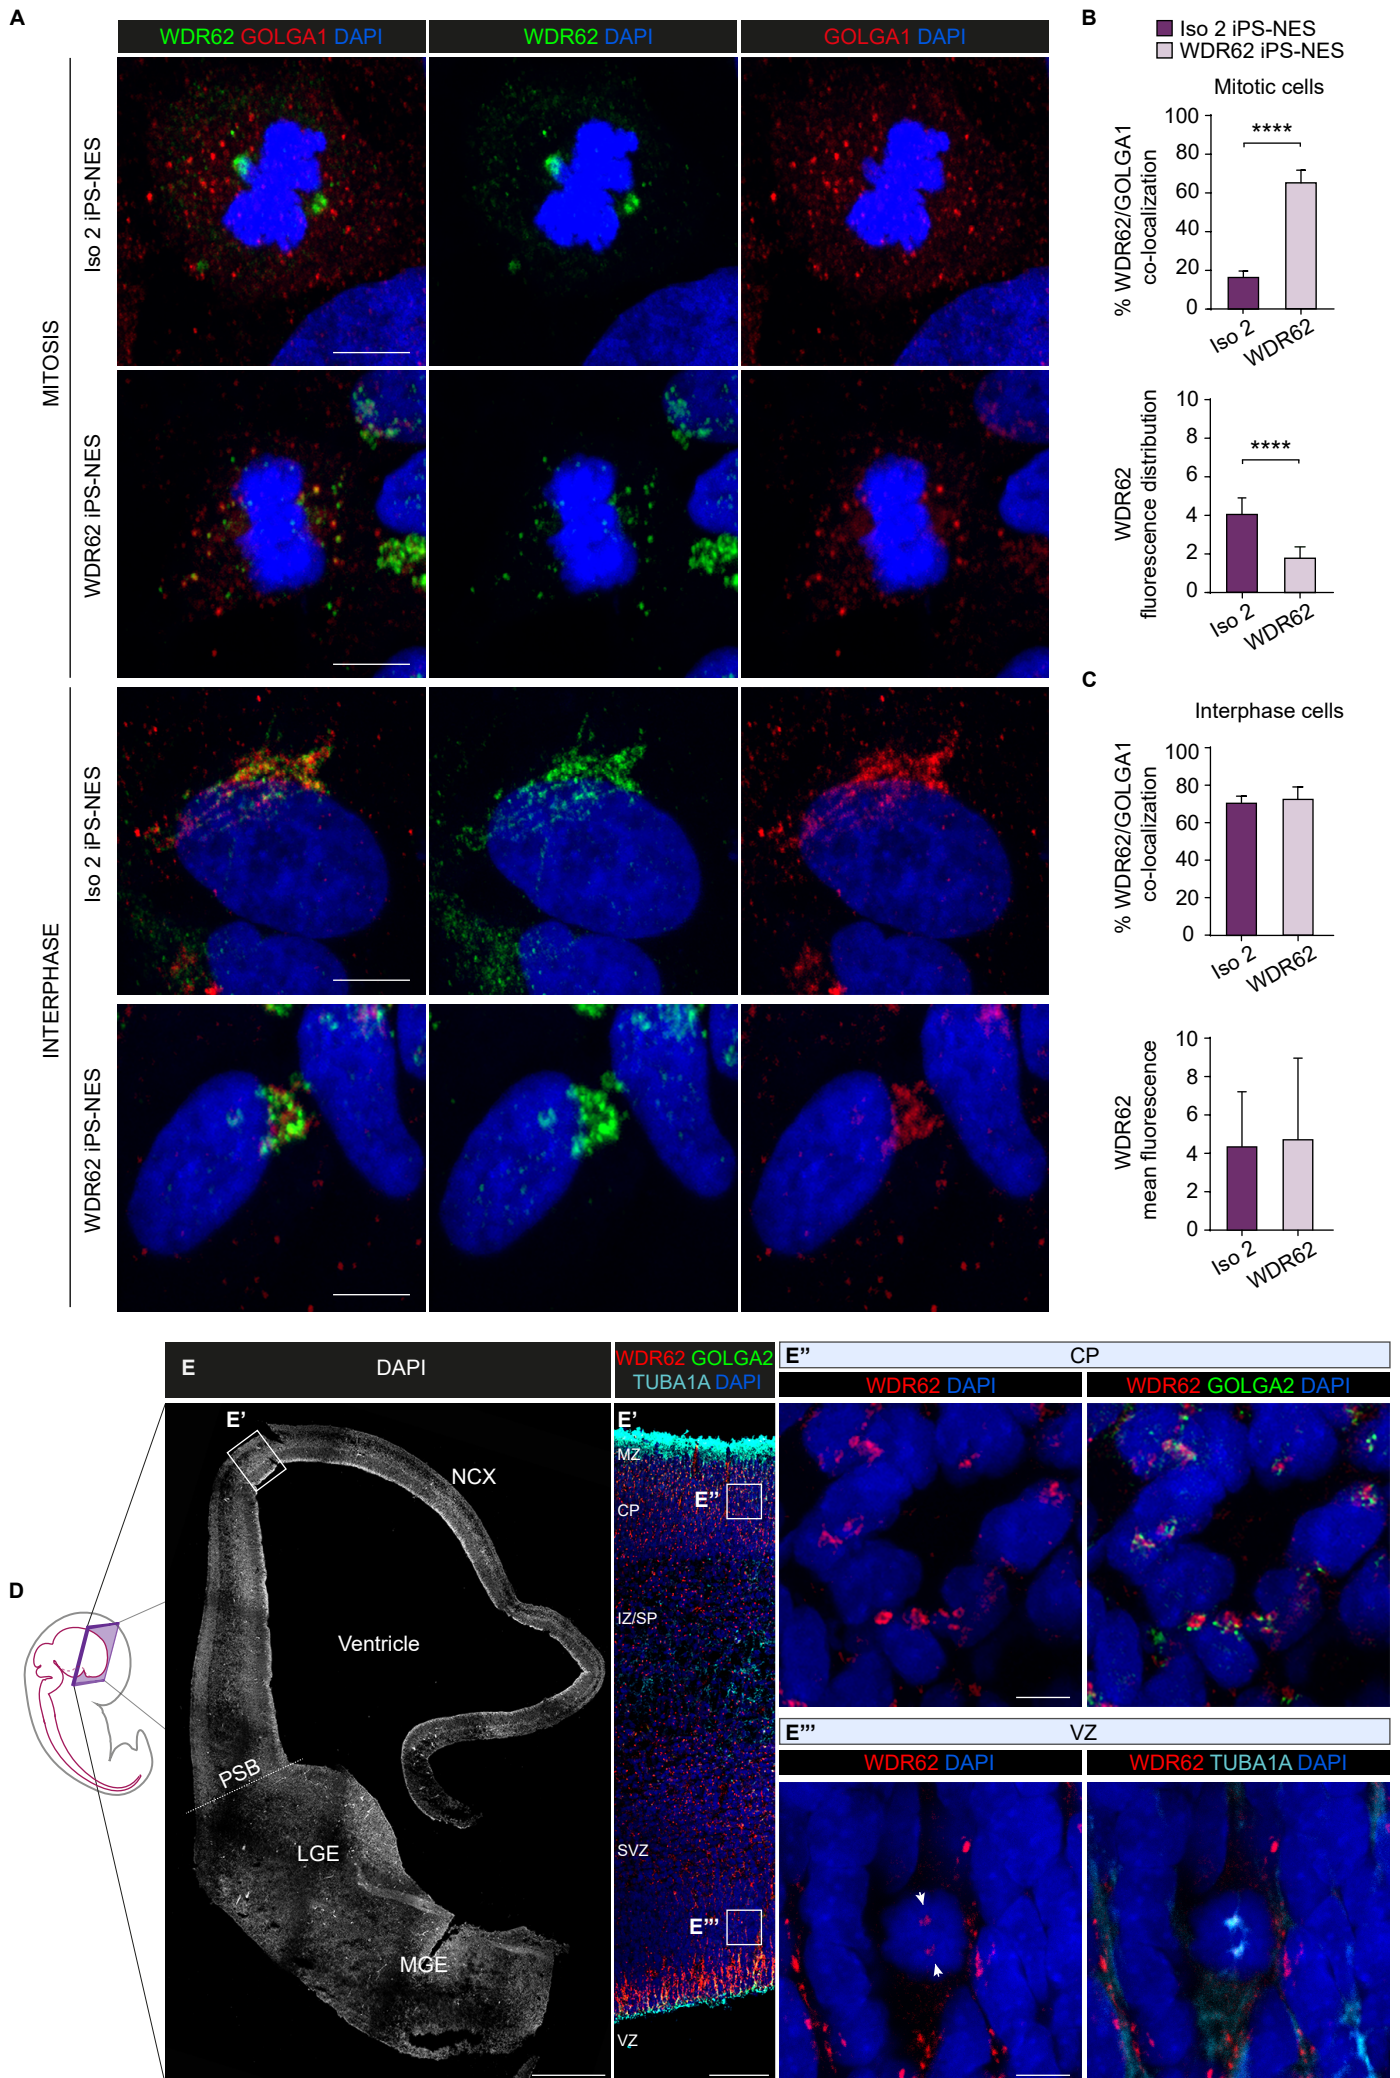

**Figure 4**

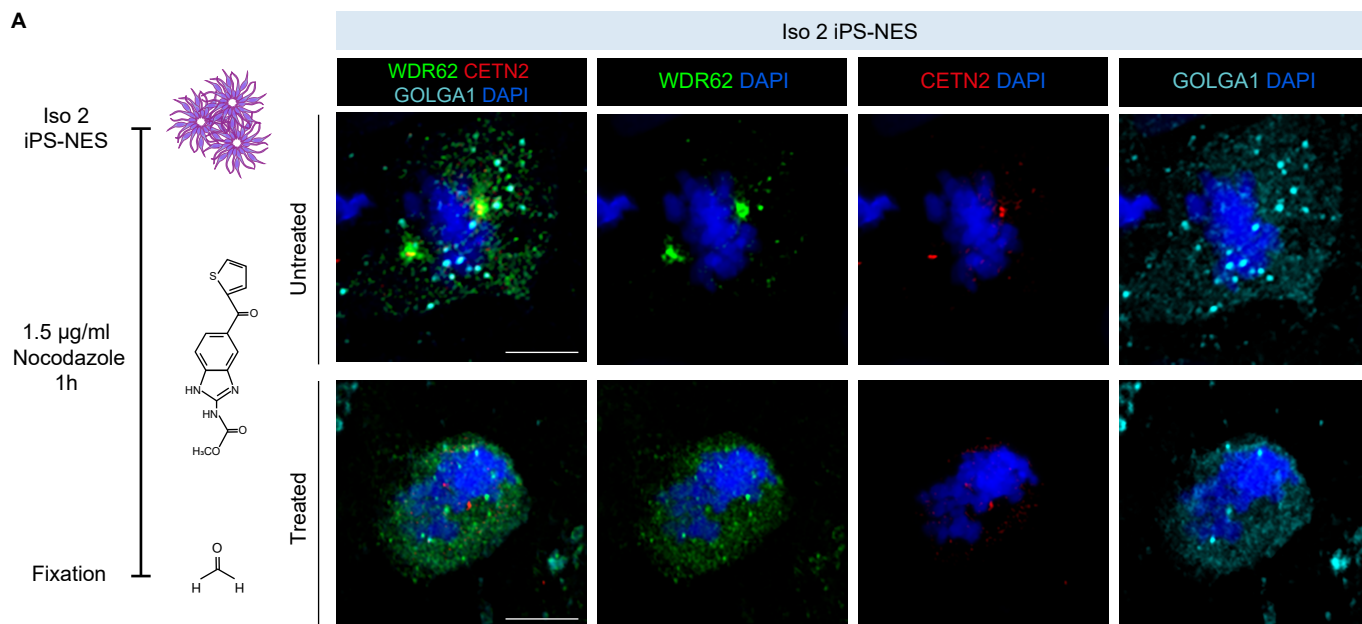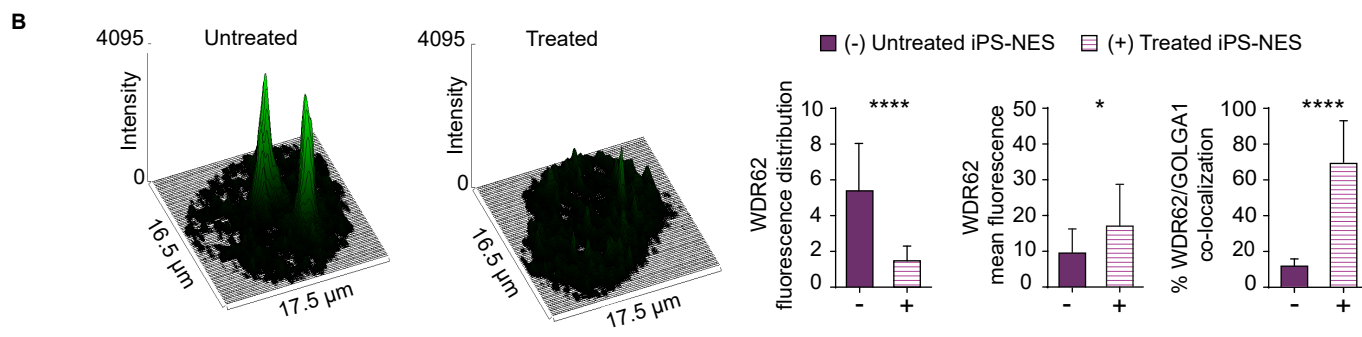



**Figure 5**

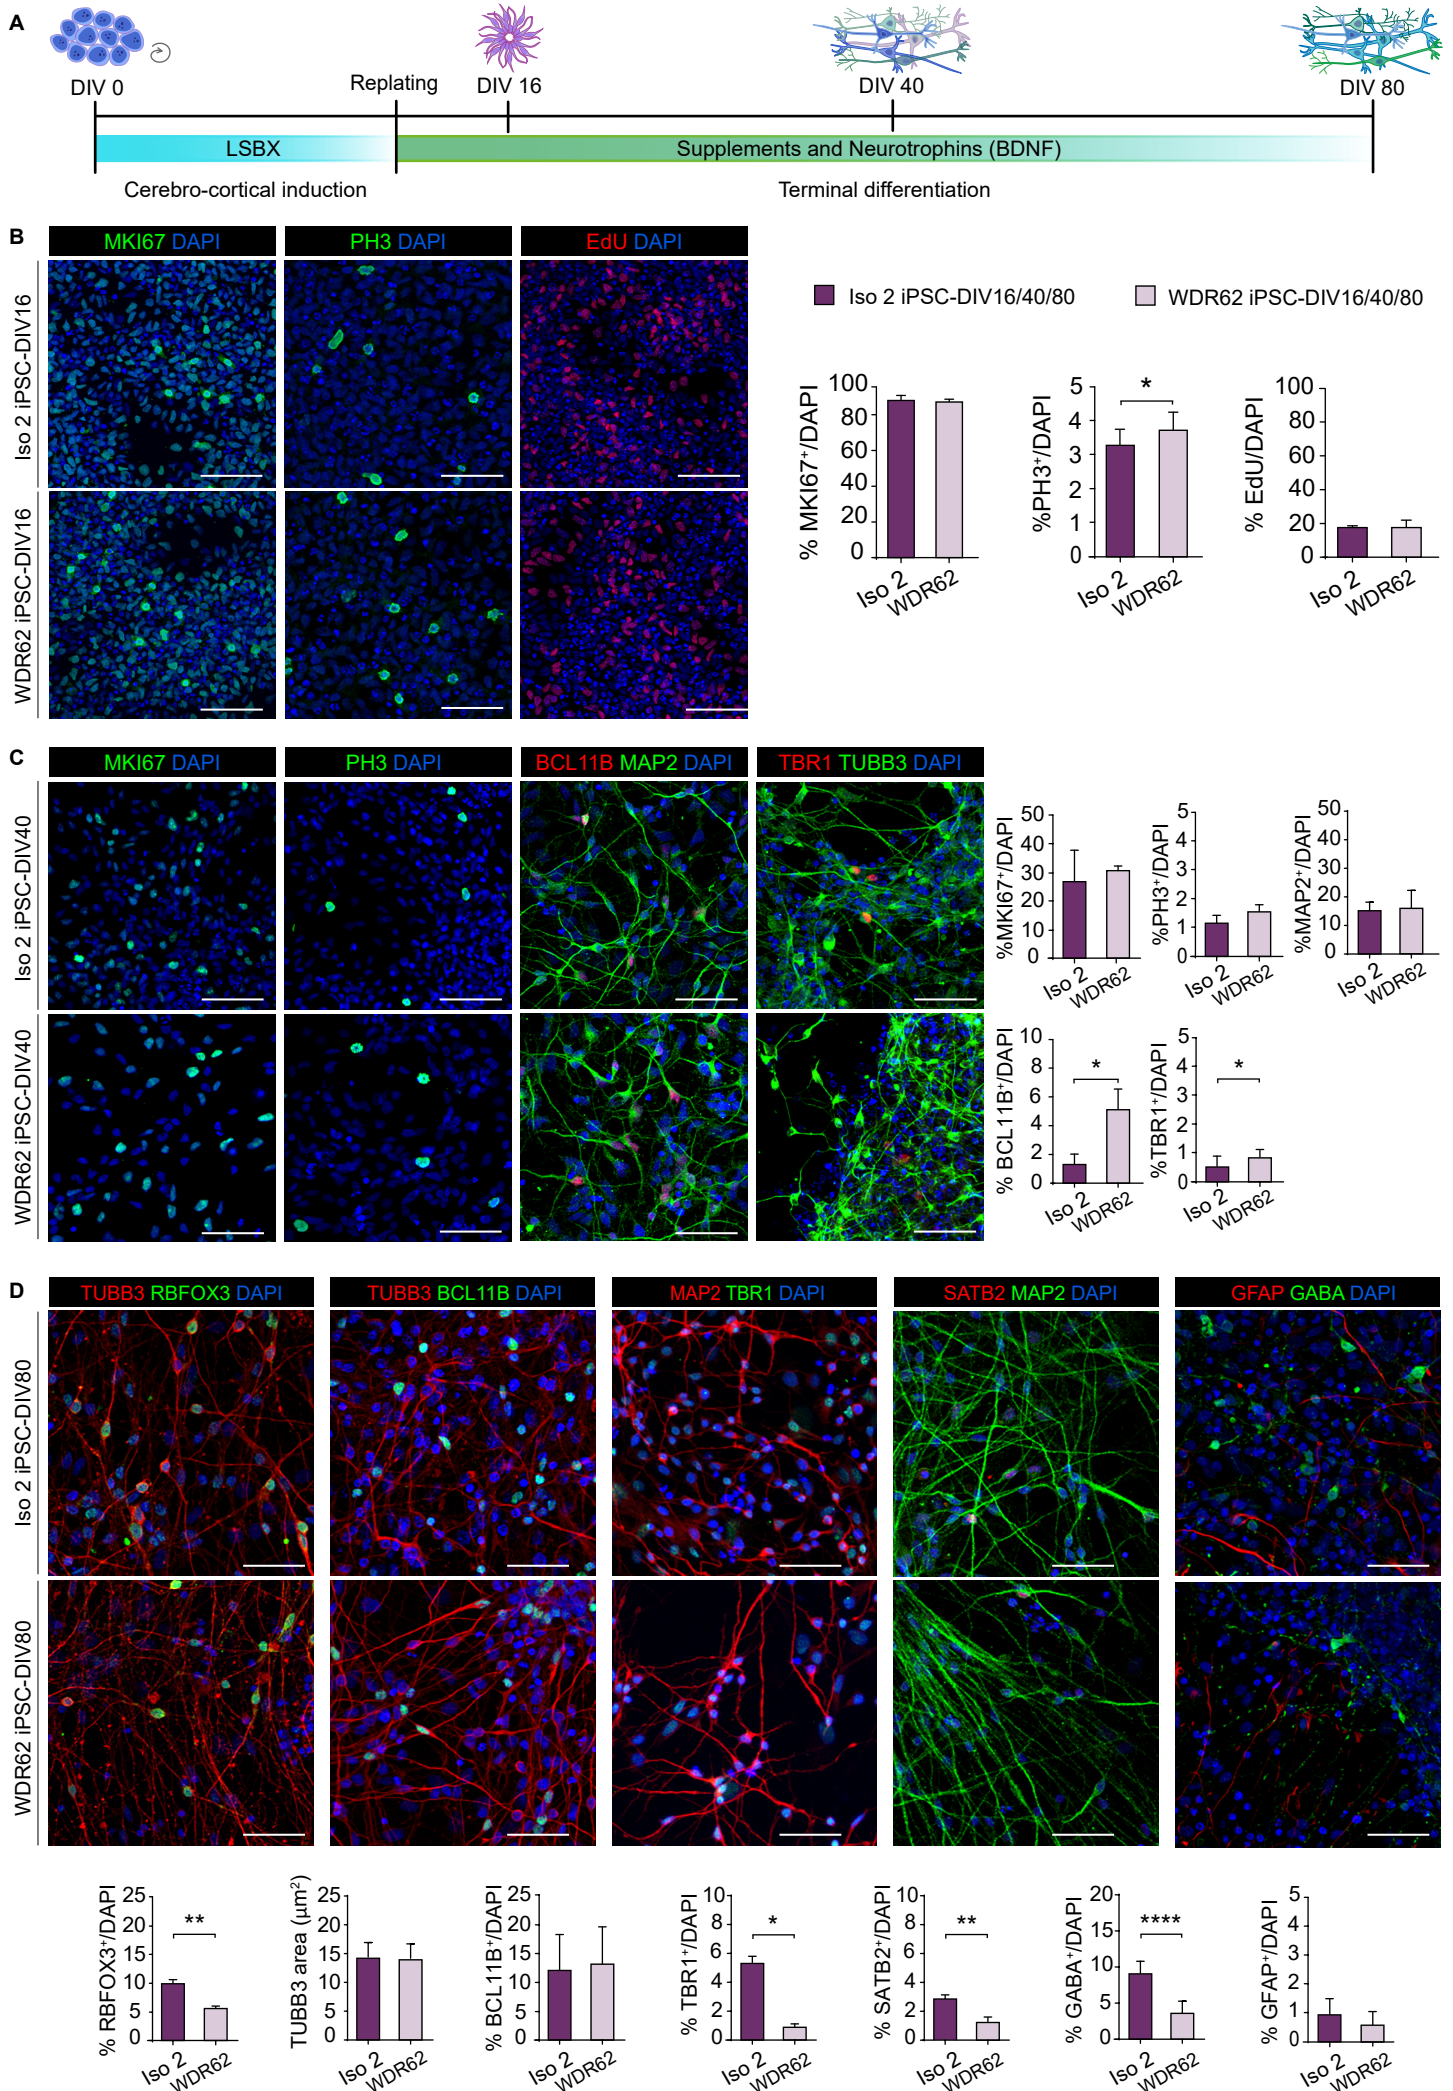



1 **Figure 1-figure supplement 1**

2

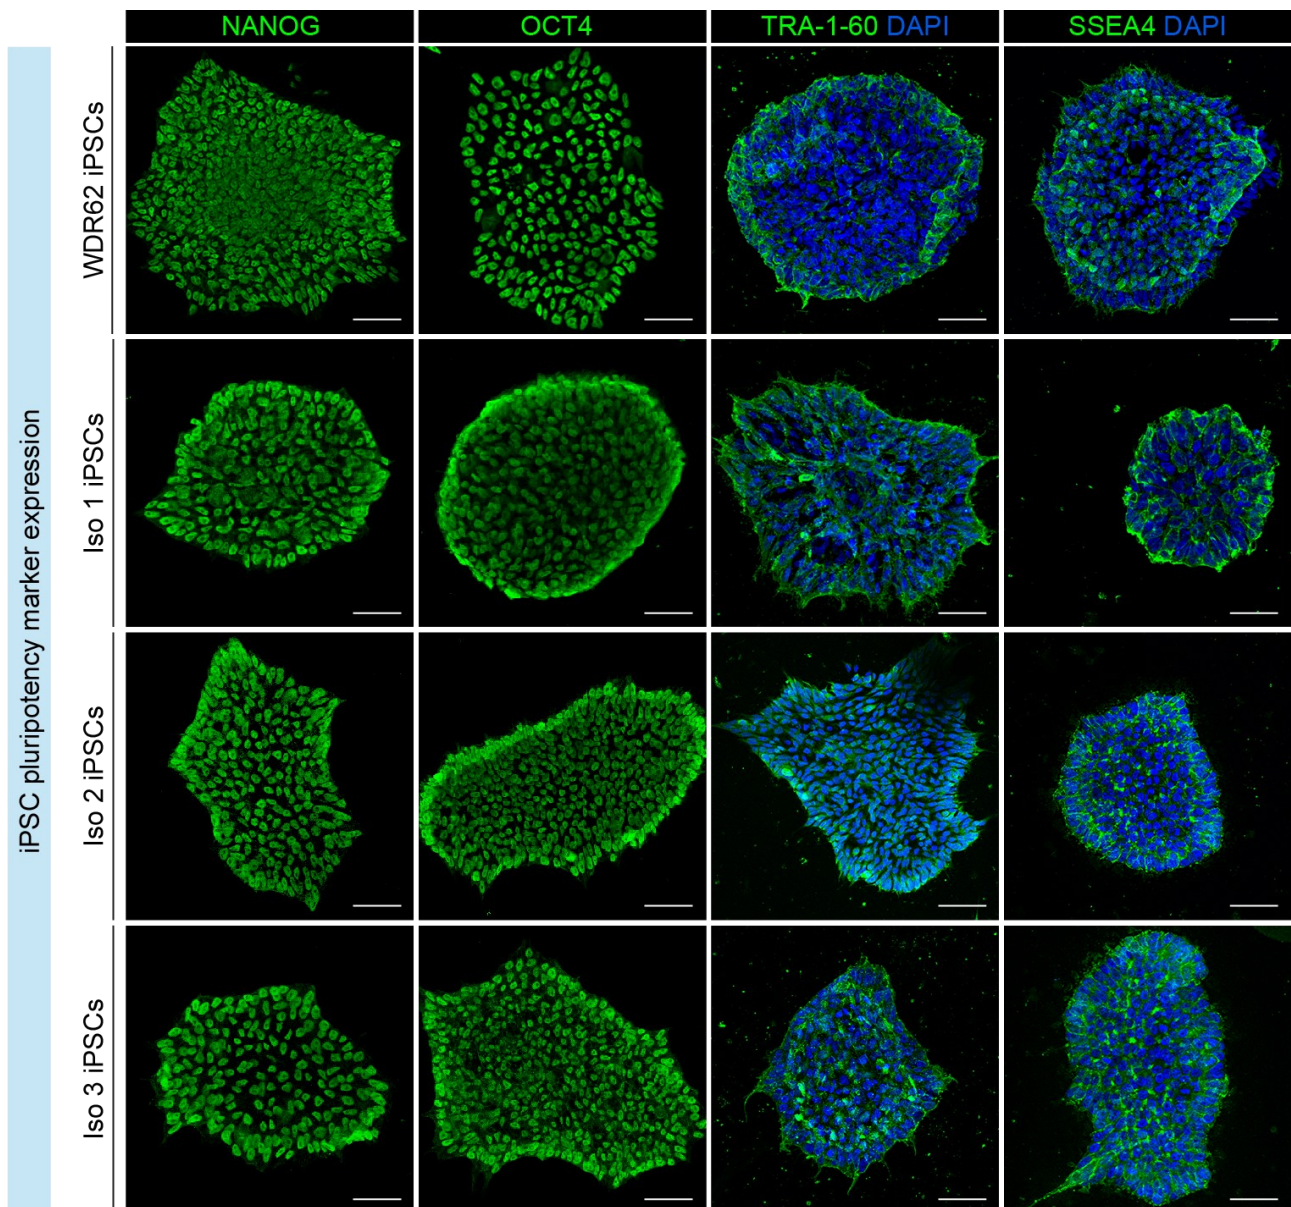

3

4

5 **Figure 1-figure supplement 1:** Analyses of pluripotency marker expression in mutant WDR62 and Iso iPSC  
6 lines. Immunofluorescence analysis for NANOG, POU5F1 (also known as OCT4), TRA-1-60, and SSEA4 in  
7 WDR62 and isogenic (Iso) iPSC lines. Scale bar = 50  $\mu$ m.

1 **Figure 1-figure supplement 2**

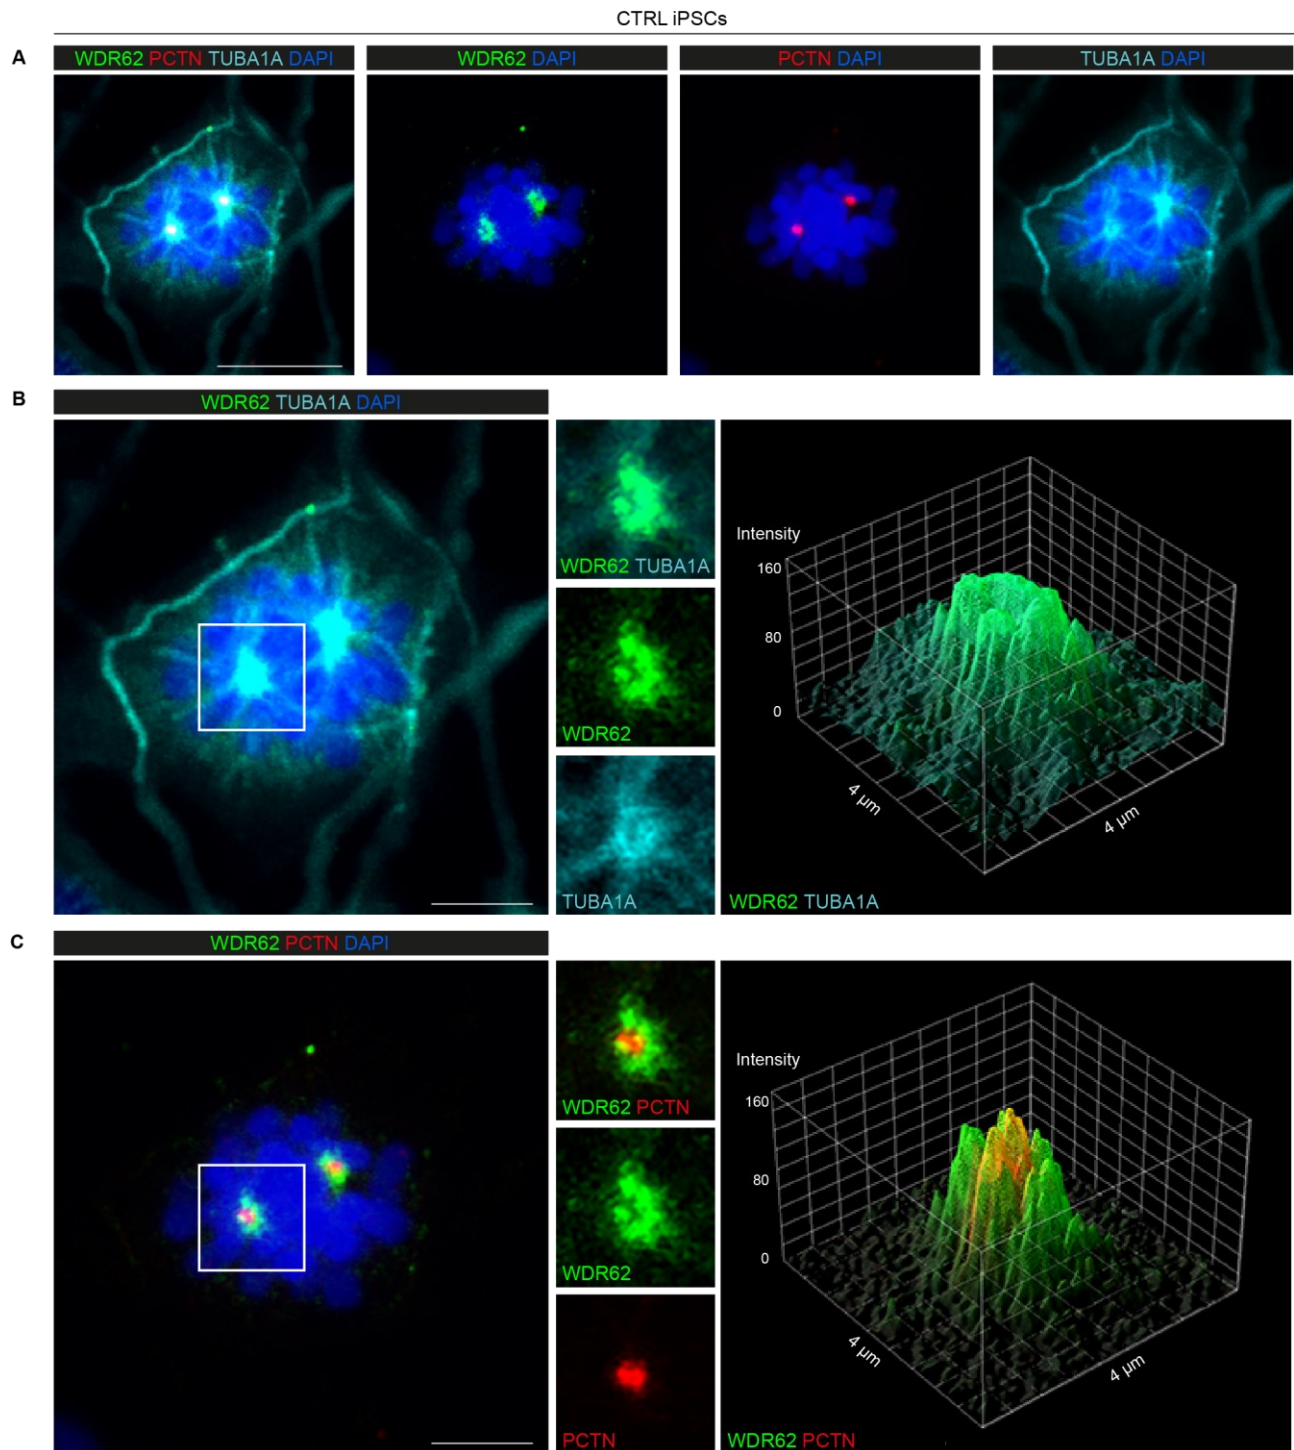

2

3

4 **Figure 1-figure supplement 2:** WDR62 is localized at the spindle poles, rather than centrosomes, during  
5 mitosis in CTRL iPSCs. A) Representative immunofluorescence assay for WDR62, PCTN, and TUBA1A  
6 showing WDR62 signal surrounding centrosomes (PCTN). B) Magnified view of the mitotic cell in A) showing  
7 the WDR62 and TUBA1A signals overlapping at the spindle poles (left). The 3D-Surface plot of fluorescence  
8 intensity shows a similar WDR62 and TUBA1A signal distribution at the spindle poles (right). C) Magnification  
9 of the mitotic cell in A) showing WDR62 surrounding the PCTN signal (left). The 3D-Surface plot of



- 10 fluorescence intensity shows non-overlapping WDR62 and PCTN signal distribution at the spindle poles (right).
- 11 Scale bar = 10  $\mu\text{m}$  in A and 5  $\mu\text{m}$  in B, C.

1 **Figure 2-figure supplement 1:**

2

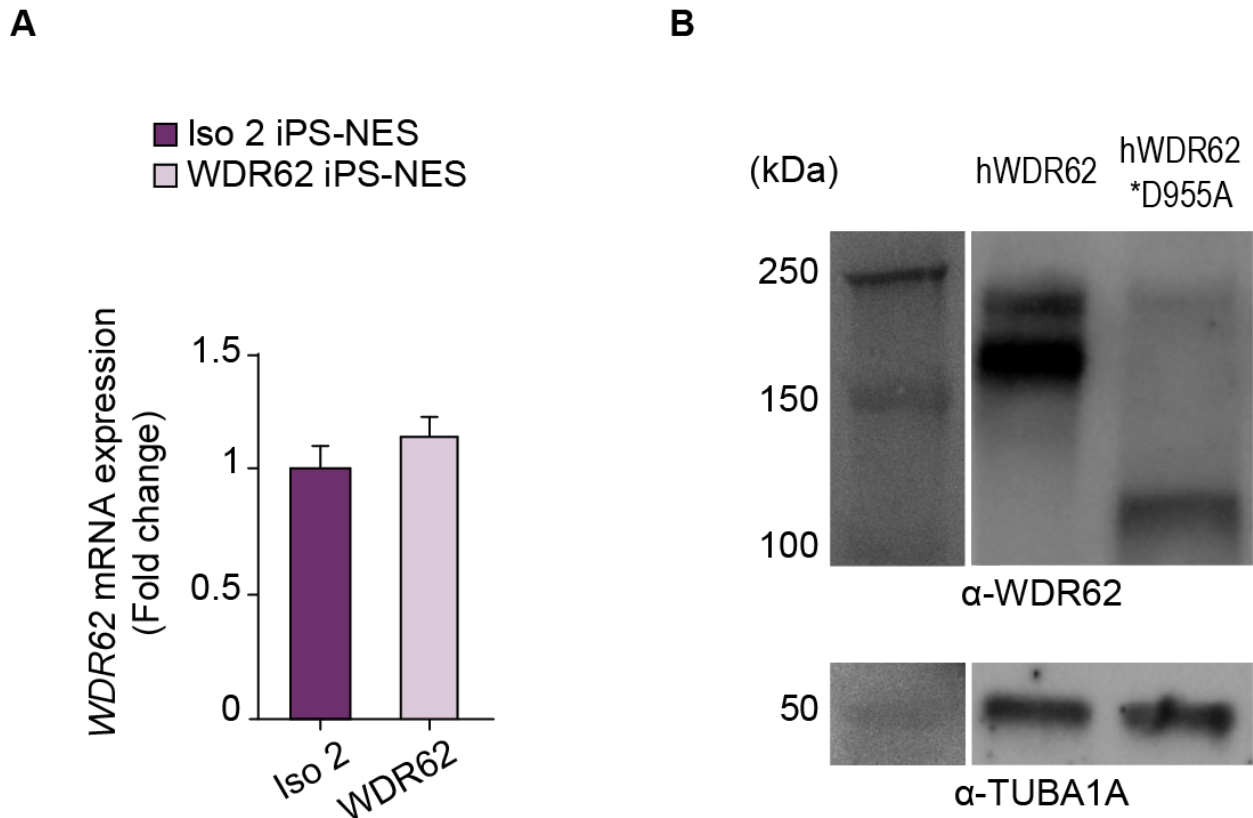

3

4 **Figure 2-figure supplement 1:** D955AfsX112 mutant WDR62 (D955A) is present in iPS-NES cells. A) RT-  
5 qPCR detects *WDR62* mRNA in Iso and WDR62 iPS-NES cells. Quantitative analysis shows no differences  
6 in *WDR62* mRNA expression. Data are shown as fold change in *WDR62* gene expression relative to *GAPDH*,  
7 a housekeeping gene, according to the  $2^{-\Delta\Delta CT}$  method. B) Western blot showing WDR62 (165 KDa) and mutant  
8 WDR62 (118 KDa) protein expression. CTRL iPS-NES cells were transfected with hWDR62 or D955AfsX112  
9 cDNA. Transfected cell lysates were immunoblotted with antibodies against WDR62 and TUBA1A, showing  
10 the presence of both WDR62 and mutant WDR62 proteins.

11 **Figure 2-figure supplement 1-source data 1:** Raw data and annotated uncropped western blots from Figure  
12 2-figure supplement 1.

1 **Figure 3-figure supplement 1**

2

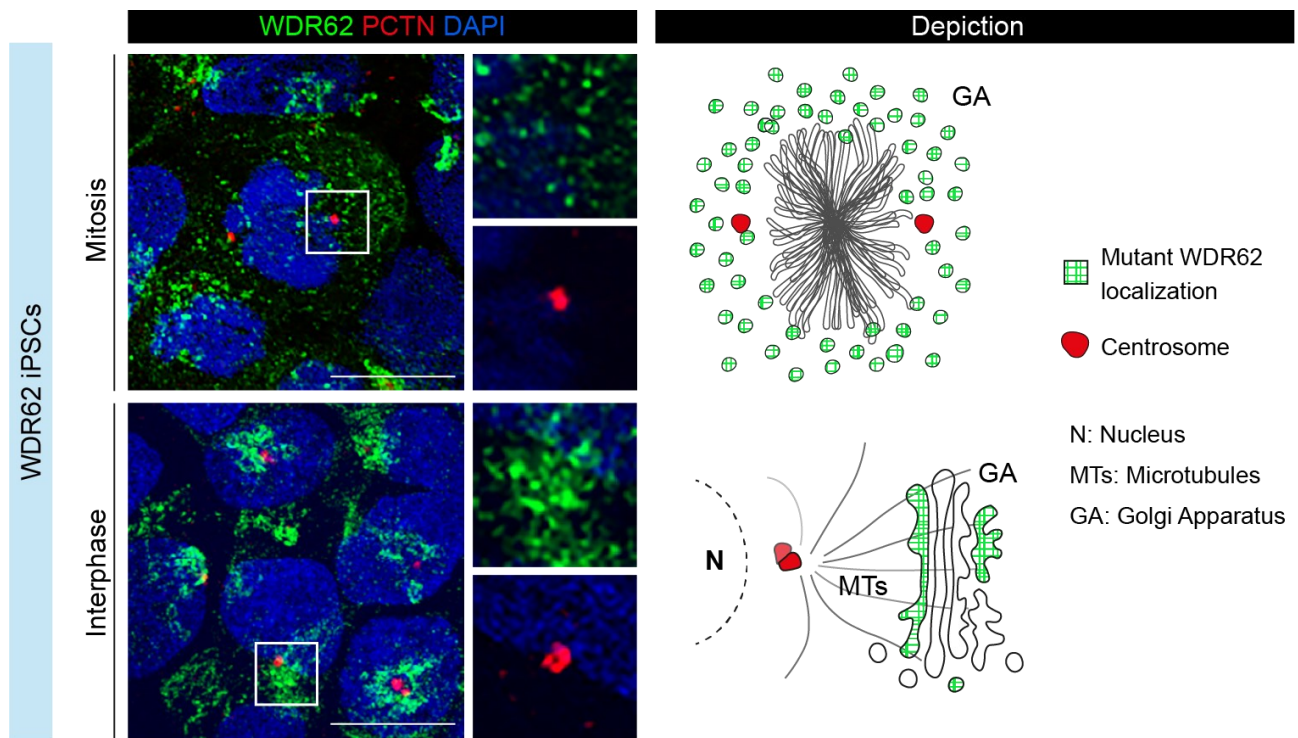

3

4

5 **Figure 3-figure supplement 1:** Endogenous WDR62 signal is polarized and perinuclear in WDR62 iPS cells.  
6 Representative immunofluorescence assay for WDR62 and PCTN during mitosis and interphase. Magnified  
7 view of areas delineated by white squares depicting subcellular localization of mutant WDR62 protein.  
8 Schematic representation of mutant WDR62 signal (green) distribution during mitosis (diffuse) and interphase  
9 (in Golgi apparatus). Scale bar = 20  $\mu$ m.

1 **Figure 3-figure supplement 2**

2

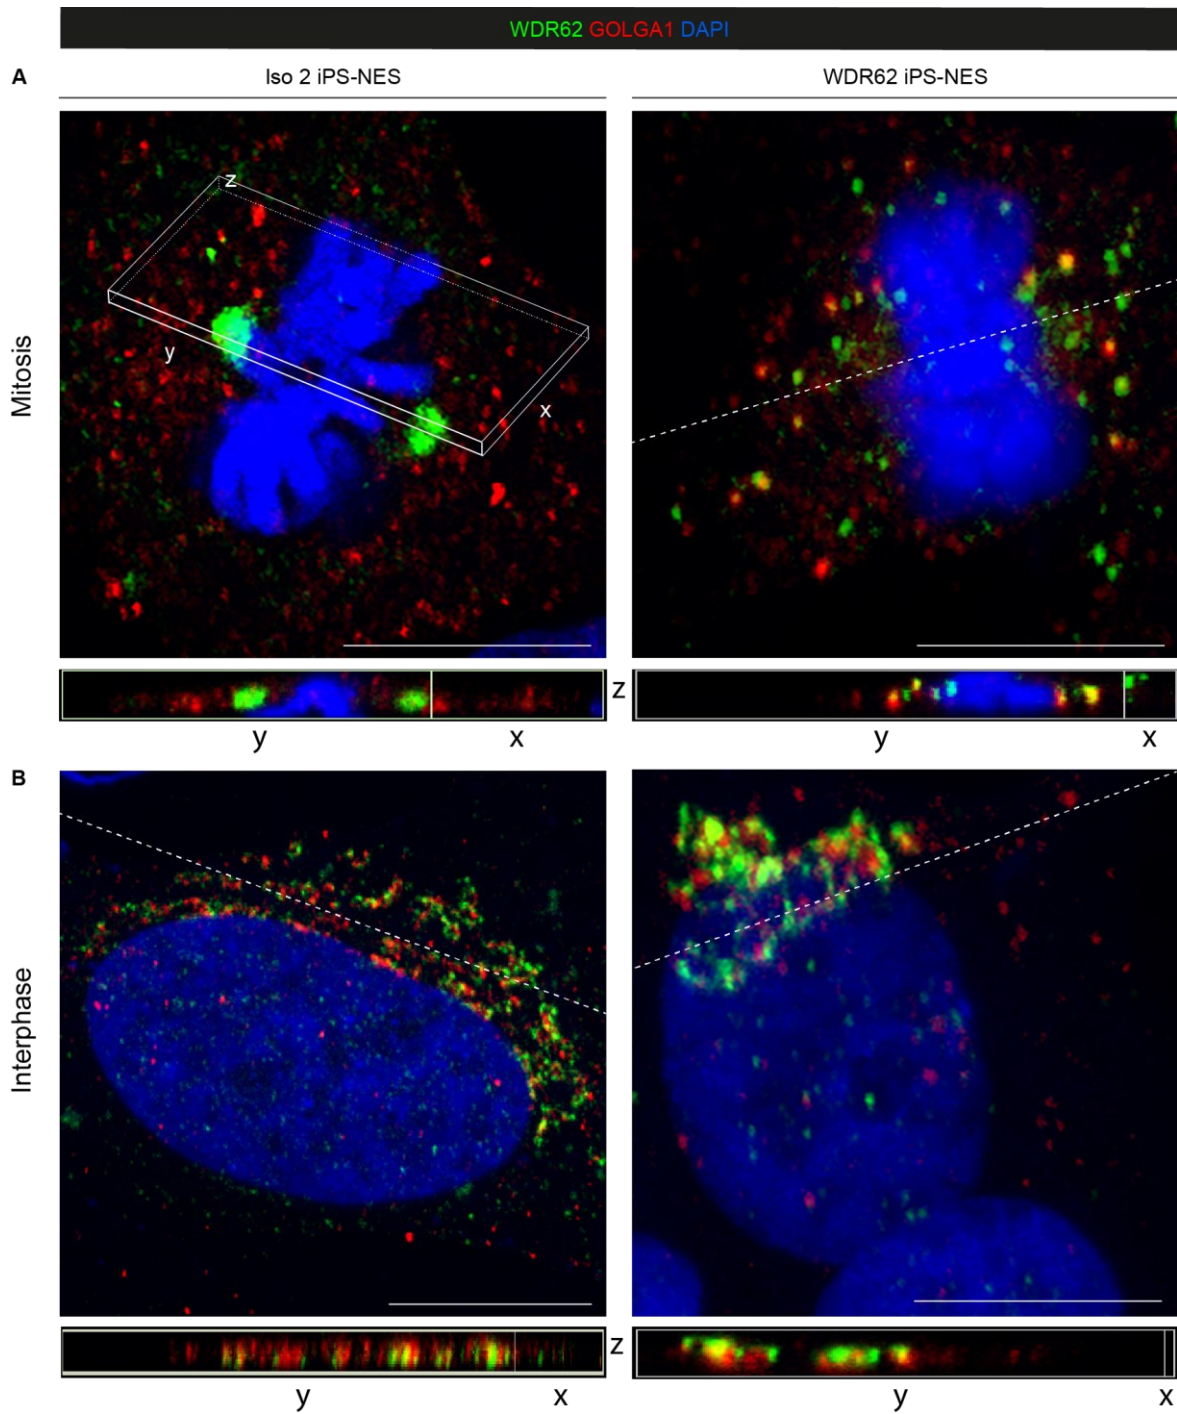

3

4

5 **Figure 3-figure supplement 2:** Divergent behaviour of WDR62 in Iso and WDR62 iPS-NES cells. A) High-  
6 resolution confocal images and 3D projections showing WDR62 retention to the Golgi apparatus in WDR62  
7 iPS-NES cells during mitosis, contrary to the spindle pole localization in Iso iPS-NES cells. B) During  
8 interphase, the WDR62 and Golgi signals overlap as highlighted in the 3D projections. Scale bar = 10  $\mu$ m in  
9 A, B.



1 **Figure 3-figure supplement 3**

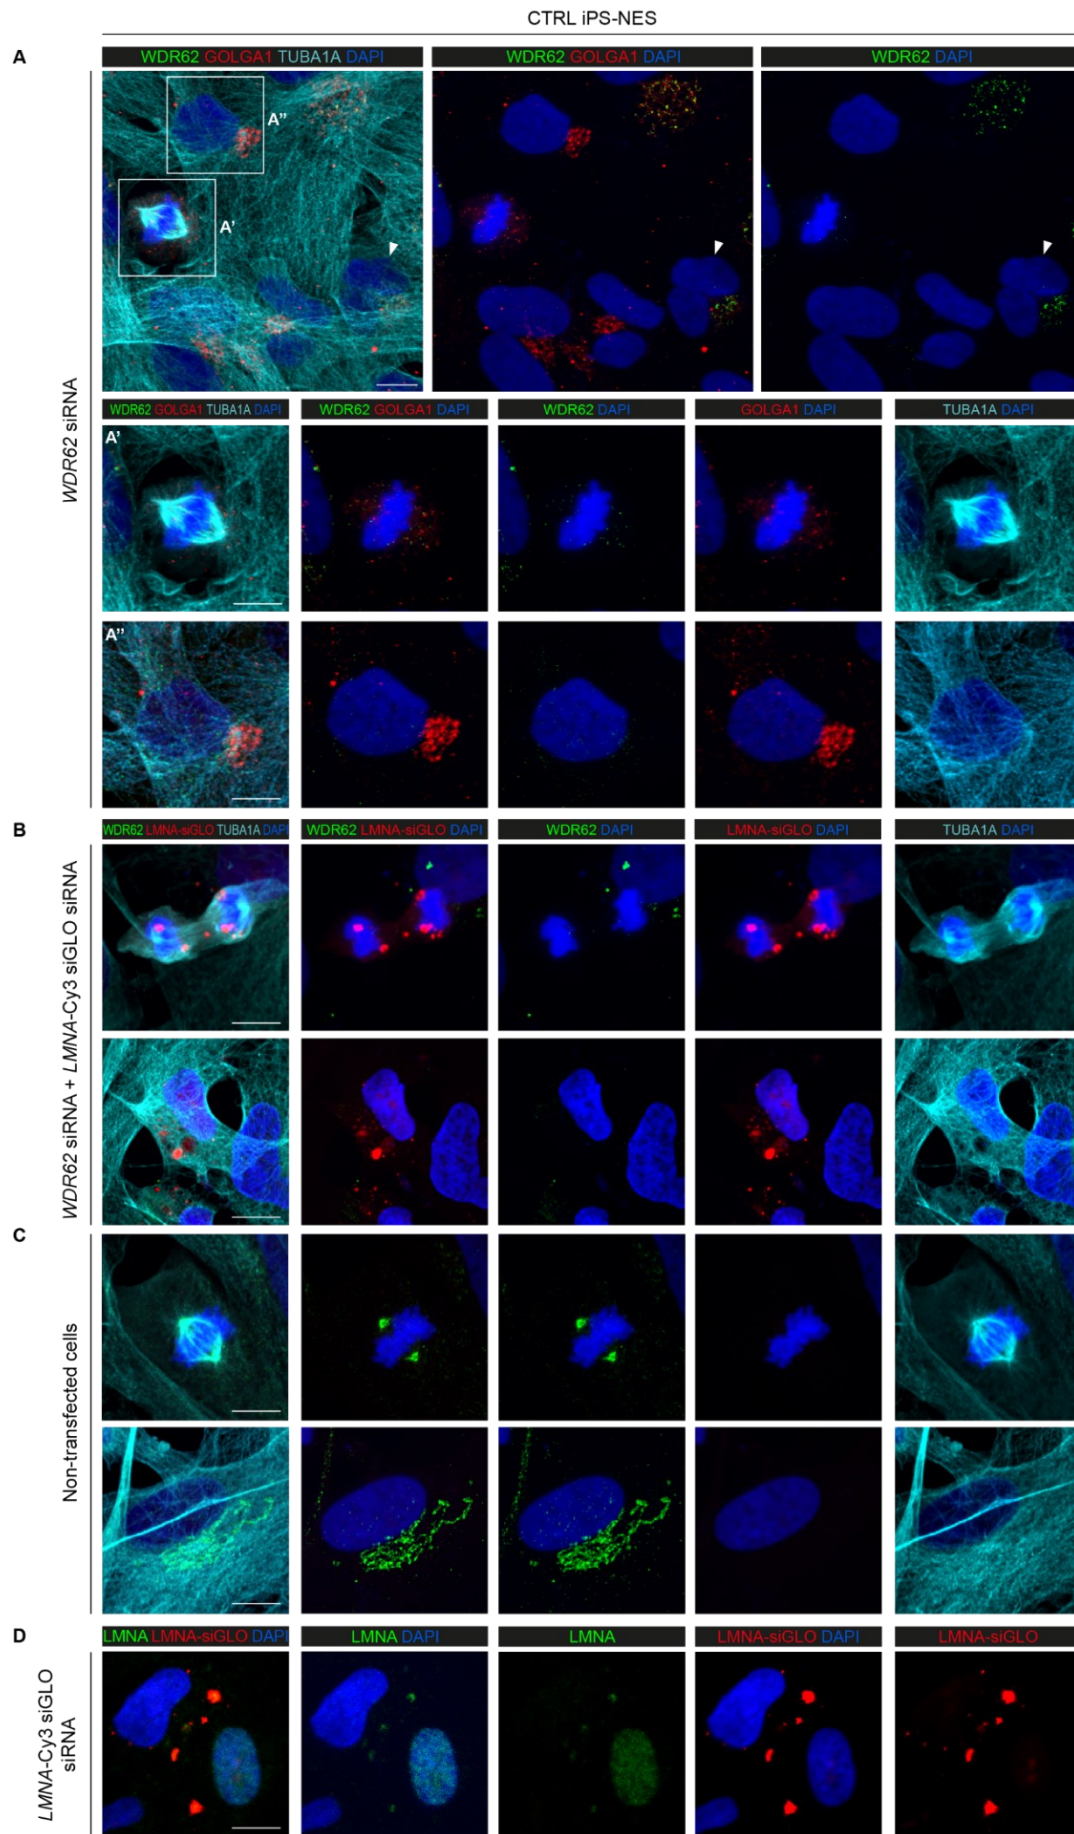



3 **Figure 3-figure supplement 3:** siRNA-mediated knockdown leads to loss of endogenous WDR62 signal. A)   
4 Immunofluorescence assay for WDR62, GOLGA1 (also known as Golgin97), and TUBA1A shows no WDR62   
5 signal in CTRL iPS-NES cells transfected with *WDR62*-siRNA. In non-transfected cells (arrowhead), WDR62   
6 signal at the Golgi apparatus is still present. Magnification of *WDR62*-siRNA treated cells in mitosis (A') and   
7 interphase (A''). B) Immunofluorescence assay for WDR62, *LMNA*-Cy3 siGLO siRNA, and TUBA1A in CTRL   
8 iPS-NES cells co-transfected with *WDR62*- and *LMNA*-Cy3 siRNAs. *LMNA*-Cy3 siGLO siRNA was used as   
9 positive transfection control. In co-transfected cells, WDR62 signal is absent. C) Representative confocal   
10 images of WDR62, *LMNA*-Cy3 siGLO siRNA, and TUBA1A in non-transfected CTRL iPS-NES cells, in which   
11 WDR62 signal is detected in both mitotic and interphase cells. D) Representative confocal images of *LMNA*   
12 and *LMNA*-Cy3 siGLO siRNA in CTRL iPS-NES cells transfected with *LMNA*-Cy3 siGLO siRNA. Contrary to   
13 non-transfected cells, transfected cells show no *LMNA* signal. Scale bar = 10  $\mu$ m in A, A', A'', B, C, D.

1 **Figure 3-figure supplement 4**

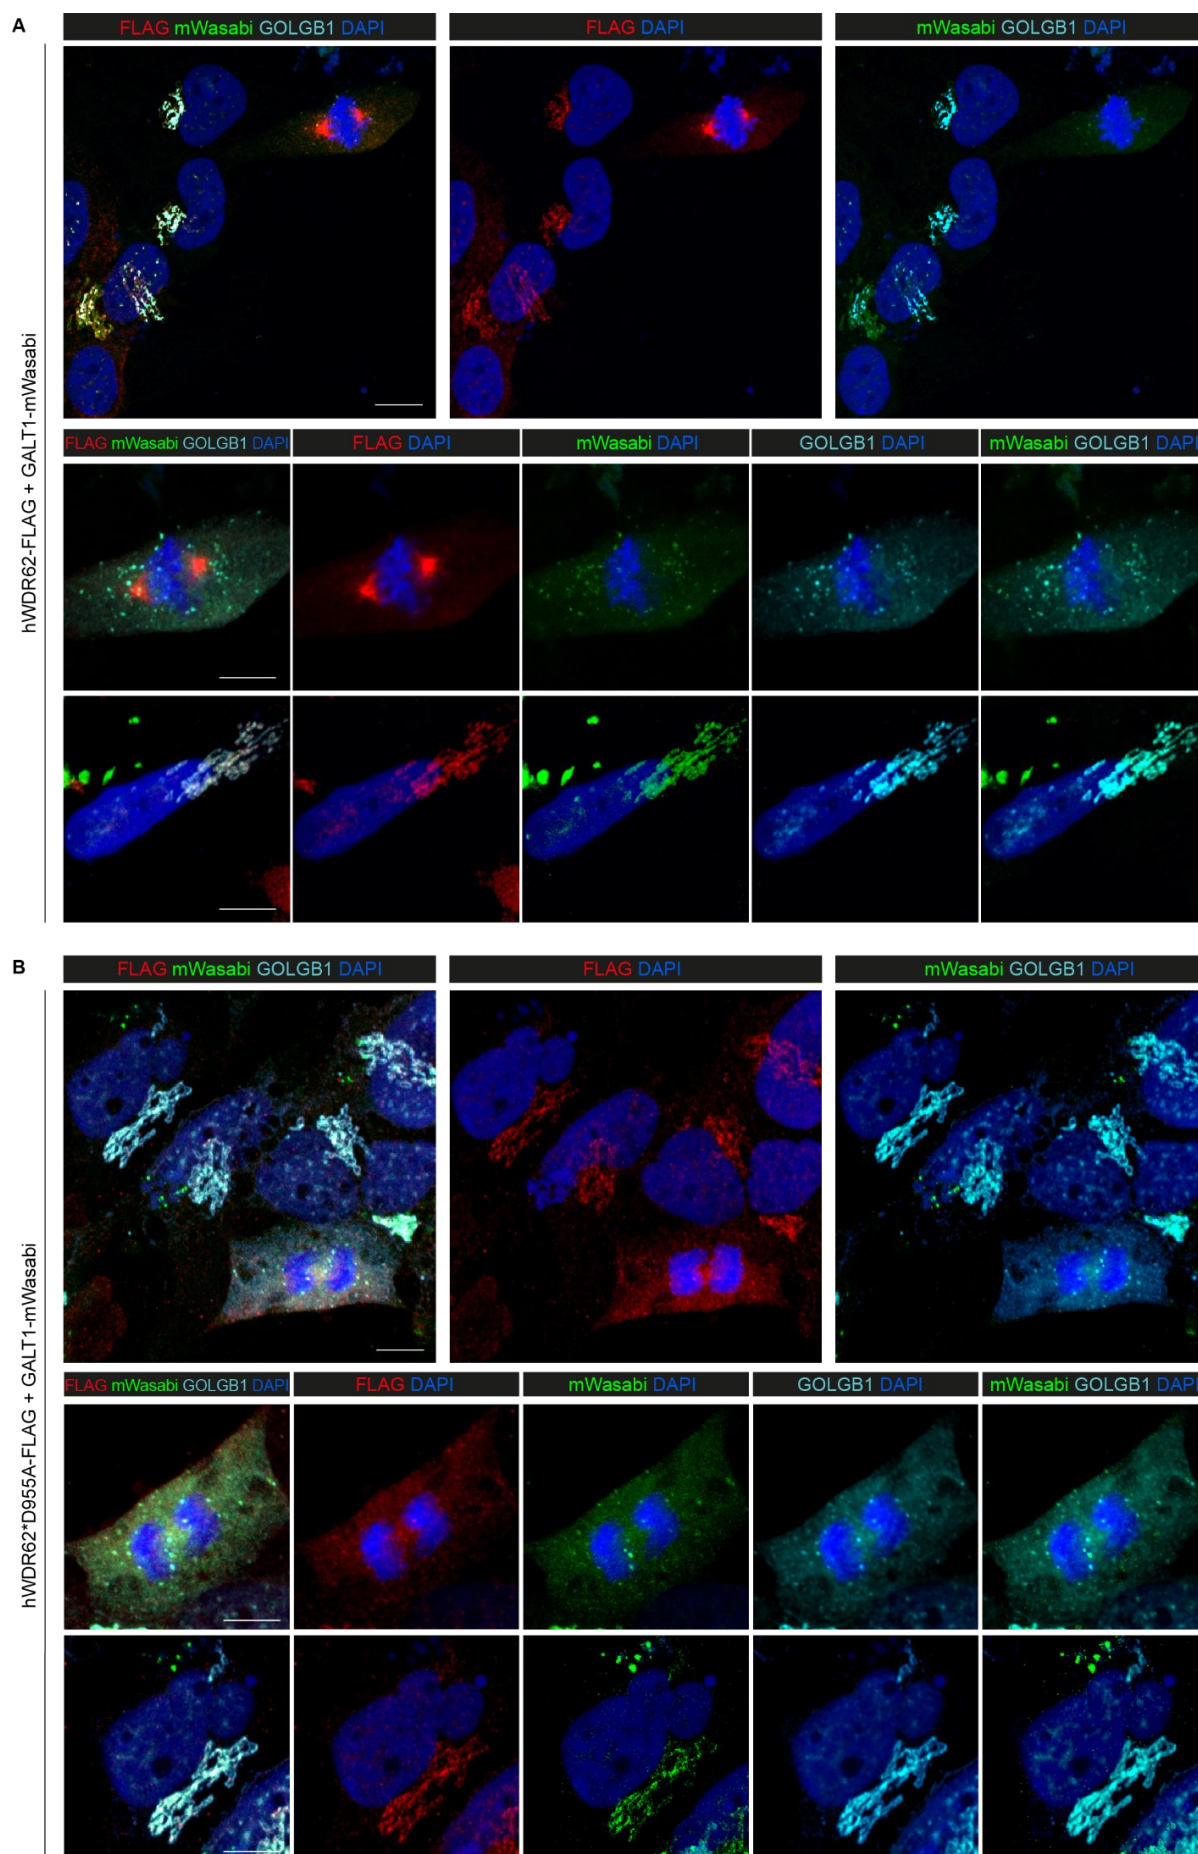

3 **Figure 3-figure supplement 4:** WDR62 localization to the Golgi apparatus during mitosis and interphase. A)  
4 CTRL iPS-NES cells were co-transfected with hWDR62-FLAG and GALT1-mWasabi. Confocal imaging for  
5 FLAG, mWasabi (a green fluorescent protein) and GOLGB1 (also known as Giantin). Magnification of specific  
6 subcellular compartments showing WDR62 localization during mitosis and interphase. B) CTRL iPS-NES cells  
7 were co-transfected with hWDR62\*D955AfsX112-FLAG and GALT1-mWasabi. Confocal analysis for FLAG,  
8 mWasabi, and GOLGB1. Magnification of specific subcellular compartments showing WDR62 localization  
9 during mitosis and interphase. The FLAG and mWasabi signals overlap in a manner similar to the endogenous  
10 WDR62/Golgi signals. Scale bar = 10  $\mu$ m in A, B.



1 **Figure 3-figure supplement 5**

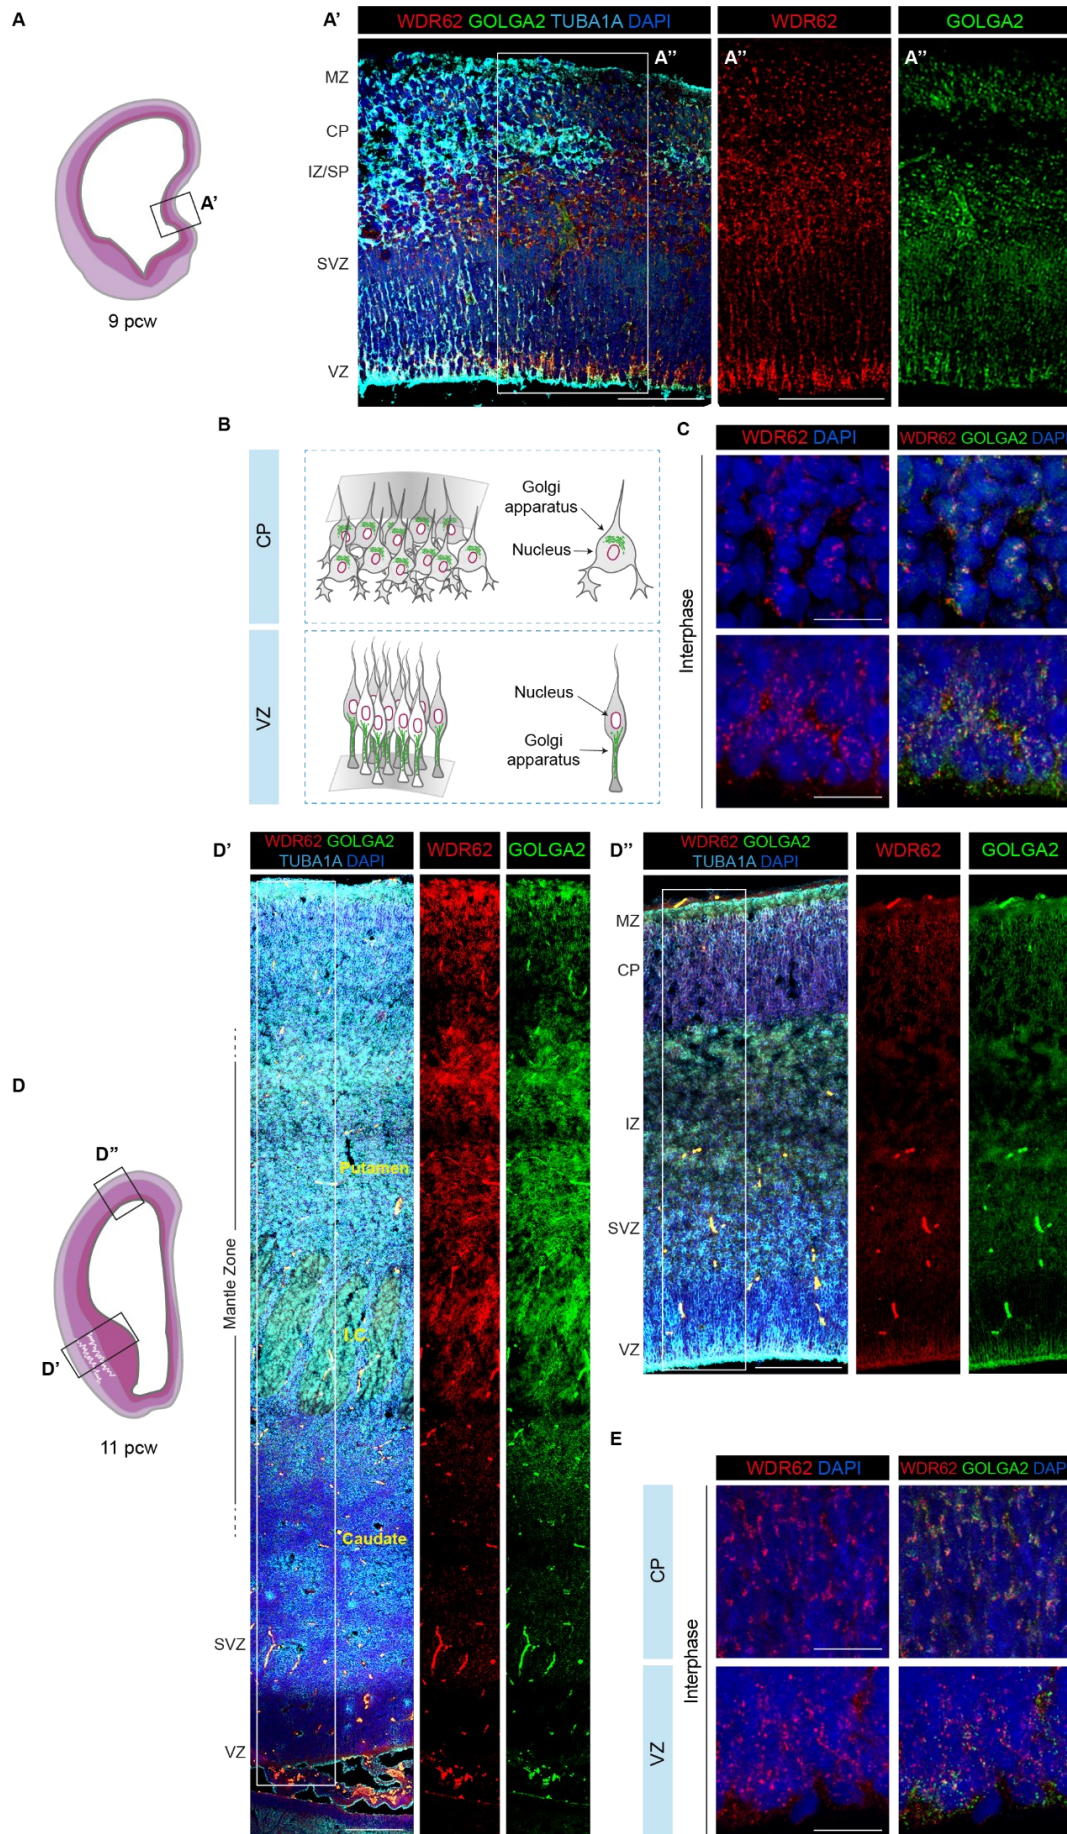

3 **Figure 3-figure supplement 5:** Dynamic expression pattern and subcellular localization of WDR62 in human  
4 telencephalon. A) Schematic illustration of a coronal hemisection of human telencephalon at 9 post-  
5 conceptional weeks (pcw). A') Representative immunofluorescence assay for WDR62, GOLGA2, and  
6 TUBA1A in the VZ of medial pallium. B) Schematic illustration of Golgi apparatus in NPCs and early post-  
7 mitotic neurons during cortical development. C) Representative magnified view of WDR62 and GOLGA2 signal  
8 distribution during interphase at CP and VZ at 9 pcw. In early post mitotic neurons at the CP, WDR62 shows  
9 a discrete perinuclear pattern and follows a diffuse-to-punctate pattern along NPC processes at the VZ,  
10 overlapping with GOLGA2. D) Schematic illustration of a coronal hemisection of human telencephalon at 11  
11 pcw. D', D'') Representative immunofluorescence assay for WDR62, GOLGA2, and TUBA1A in the developing  
12 basal ganglia (D') and neocortex (D''). E) Representative magnified views of WDR62 and GOLGA2 signal  
13 distribution during interphase at the CP and VZ at 11 pcw. WDR62 overlaps with GOLGA2 in post-mitotic  
14 neurons at the CP and NPC at the VZ, similar to the pattern observed at 9 pcw. Scale bar = 100  $\mu\text{m}$  in A', 5  
15  $\mu\text{m}$  in C, E and 100  $\mu\text{m}$  in D', D''.

16

17 MZ (Marginal Zone); CP (Cortical Plate); IZ/SP (Intermediate Zone/Subplate); SVZ (Sub-Ventricular Zone); VZ  
18 (Ventricular Zone); I.C. (Internal Capsule).



1 **Figure 4-figure supplement 1:**

2

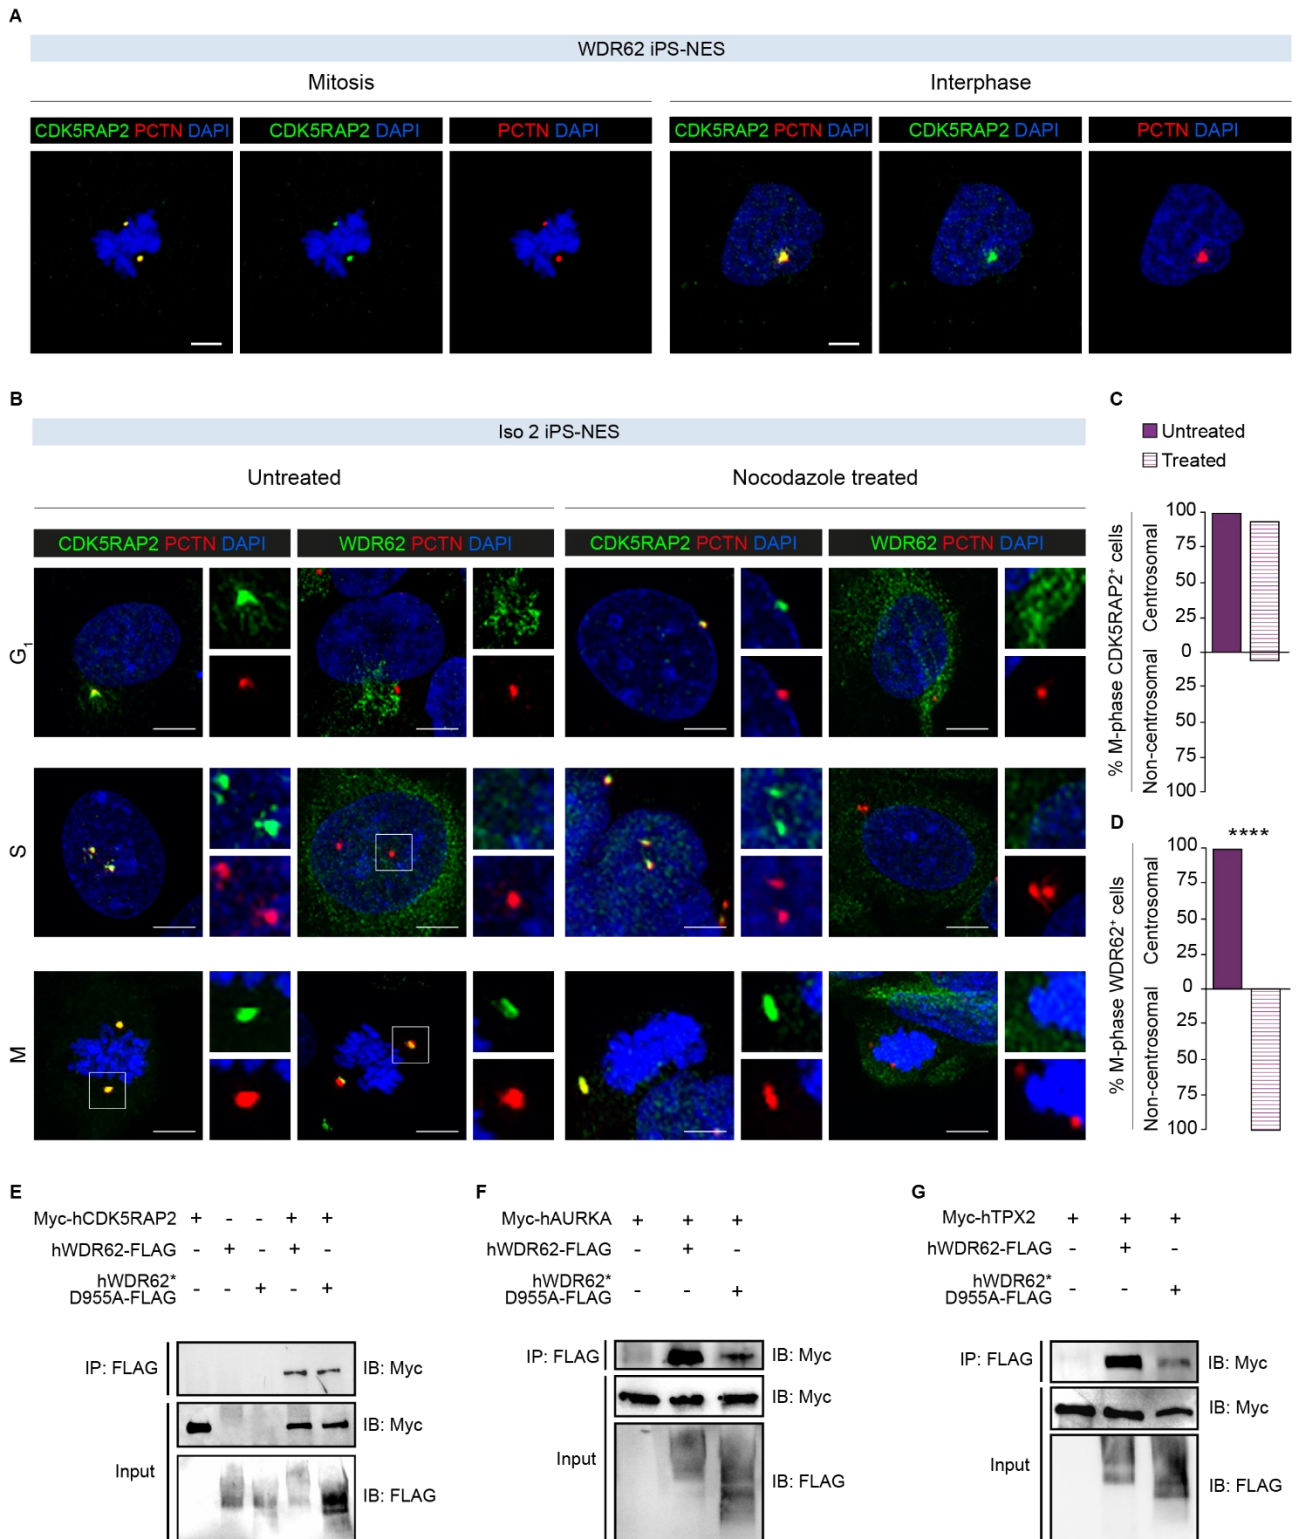

3

4

5 **Figure 4-figure supplement 1:** WDR62 interaction with CDK5RAP2, AURKA, and TPX2. A)

6 Immunofluorescence assay for CDK5RAP2 and PCTN in WDR62 iPS-NES cells during mitosis and interphase.

7 B) Representative immunofluorescence assay for CDK5RAP2, WDR62, and PCTN in nocodazole-treated (1.5

8  $\mu\text{g/ml}$  for 1 h) and untreated Iso iPS-NES cells during G<sub>1</sub>, S, and mitosis (M-phase). C) Quantitative analysis  
9 of CDK5RAP2 centrosomal localization during mitosis, which is unaltered by nocodazole. D) Quantitative  
10 analysis of WDR62 spindle pole localization during M-phase; nocodazole treatment results in a dispersed  
11 perinuclear signal. Data are shown as mean,  $p$ -value  $> 0.05$  (Chi-square test) and mean,  $p$ -value  $< 0.05$   
12 (Fisher's exact test), respectively (total cells, N = 46). E-G) WDR62 interacts with CDK5RAP2 (E), AURKA (F),  
13 and TPX2 (G). HEK293T cells were transfected with Myc-hCDK5RAP2, hAURKA, or hTPX2 and hWDR62-  
14 FLAG or WDR62 D955AfsX112-FLAG cDNA, as indicated. Cell lysates were immunoprecipitated with an  
15 antibody against the Myc-tag and immunoblotted with an antibody against FLAG. WDR62 interaction is  
16 detectable with all three partners. Scale bar = 5  $\mu\text{m}$  in A and 10  $\mu\text{m}$  in B.

17

18 **Figure 4-figure supplement 1-source data 1:** Raw data and annotated uncropped western blots from Figure  
19 4-figure supplement 1.

20

21 **Figure 4-figure supplement 1-source data 2:** Raw data and annotated uncropped western blots from Figure  
22 4-figure supplement 1.

23

24 **Figure 4-figure supplement 1-source data 3:** Raw data and annotated uncropped western blots from Figure  
25 4-figure supplement 1.
